# Supplementary material for: In-depth comparative proteomic analysis of yeast proteome using iTRAQ and SWATH based MS
Source: Royal Society of Chemistry journal article supplement (doi:10.1039/c5mb00234f), 2015-06-09
Supplement: c5mb00234f4.pdf [file c5mb00234f4.pdf]

# Supplementary figure 3

|             | Experiment 1                            | Experiment 2                           | Experiment 3                            |
|-------------|-----------------------------------------|----------------------------------------|-----------------------------------------|
| iTRAQ Label | Sample Name                             | Sample Name                            | Sample Name                             |
| 114         | Control Rep1                            | Cysteine Rep2                          | Cysteine Rep3                           |
| 115         | Cysteine Rep1                           | Control Rep2                           | Control Rep3                            |
| 116         | Technical replicate of<br>Control Rep1  | Tehnical replicate of<br>Cysteine Rep2 | Technical replicate of<br>Cysteine Rep3 |
| 117         | Technical replicate of<br>Cysteine Rep1 | Technical replicate of<br>Control Rep2 | Technical replicate of<br>Control Rep3  |
