# Supplementary material for: In-depth comparative proteomic analysis of yeast proteome using iTRAQ and SWATH based MS
Source: Royal Society of Chemistry journal article supplement (doi:10.1039/c5mb00234f), 2015-06-09
Supplement: c5mb00234f5.pdf [file c5mb00234f5.pdf]

Supplementary Information:

Supplementary Figure 1: Reproducibility in the TIC (Total ion chromatogram) of three technical replicates of both control and cysteine treated cells used in SWATH-MS analysis.

Supplementary Figure 2A: Inconsistency in retention time for any fragment ion across different runs; 2B: Nonspecific XIC ion interference for any specific peptide quantitation; 2C: Comparison of XICs ion intensity ratio with ion intensity ratios obtained from fragment ion library for any specific peptide; 2D: Representative XICs for a particular peptide which has been included in the study.

Supplementary Figure 3: iTRAQ labelling for different experiments

Supplementary Table 1: List of identified proteins at 1% protein global FDR using iTRAQ and ion library for SWATH-MS analysis.
