# Supplementary material for: In-depth comparative proteomic analysis of yeast proteome using iTRAQ and SWATH based MS
Source: Royal Society of Chemistry journal article supplement (doi:10.1039/c5mb00234f), 2015-06-09
Supplement: c5mb00234f6.xlsx [file c5mb00234f6.xlsx]

## Sheet: iTRAQ
Protein Name	Experiment I				Experiment II				Experiment III
	Unused score	% coverage	No. of peptides		Unused score	% coverage	No. of peptides		Unused	% Cov	Peptides(95%)
sp|P00359|G3P3_YEAST	206.31	97.59	663		231.82	94.88	856		209.69	94.6	745
sp|P06169|PDC1_YEAST	203.32	86.86	548		285.93	90.05	722		248.54	95.2	667
sp|P00925|ENO2_YEAST	200.72	96.34	633		283.17	93.36	832		249.79	94.5	772
sp|P07149|FAS1_YEAST	200.31	76.06	160		215.11	73.14	191		215.63	75.7	190
sp|P00549|KPYK1_YEAST	188.84	98.6	417		216.45	94.4	523		196.12	94.8	485
sp|P19097|FAS2_YEAST	177.91	77.05	146		181.31	71.81	150		194.39	80	177
sp|Q00955|ACAC_YEAST	175.07	70.94	119		184.79	67.71	128		199.93	74.2	138
sp|P14540|ALF_YEAST	163.13	93.59	561		194.46	92.48	555		176.71	92.2	506
sp|P16521|EF3A_YEAST	149.55	79.6	194		150.65	78.74	196		174.57	79.5	226
sp|P10591|HSP71_YEAST	143.67	79.13	247		196.72	80.84	333		148.79	78.4	264
sp|P07259|PYR1_YEAST	137.84	55.33	80		161.33	65.31	105		172.93	59.4	103
sp|P15108|HSC82_YEAST	132.24	66.67	140		154.07	68.37	210		148.71	65	182
sp|P32324|EF2_YEAST	129.72	88.36	162		145.66	82.78	221		136.64	82.5	209
sp|P00560|PGK_YEAST	125.55	95.19	300		139.01	91.83	292		135.58	91.4	284
sp|P22137|CLH_YEAST	122.12	75.8	77		129.72	70.72	76		128.07	72.8	85
sp|P17255|VATA_YEAST	121.87	87.21	97		118.13	75.16	105		99.44	69.9	94
sp|P16861|K6PF1_YEAST	115.92	83.59	91		127.41	84.3	121		121.02	74.6	109
sp|P09436|SYIC_YEAST	115.35	78.73	79		129.36	80.22	91		118.59	81.5	86
sp|P05694|METE_YEAST	114.52	79.66	189		128.35	84.62	243		120.53	83.4	215
sp|P33892|GCN1_YEAST	111.44	39.75	58		128.24	45.88	76		138.89	49	83
sp|P07264|LEUC_YEAST	110.78	79.72	144		135.07	74.84	216		123.46	76.3	185
sp|P03965|CARB_YEAST	105.16	76.74	73		122.06	70.93	107		104.86	69	85
sp|P11986|INO1_YEAST	102.82	91.37	148		113.42	87.05	194		96.87	87.6	174
sp|P07806|SYV_YEAST	98.03	62.41	67		119.49	73.37	80		110.15	70.4	73
sp|P25694|CDC48_YEAST	96.68	80.12	67		96.46	78.92	84		93.65	73.8	75
sp|P31539|HS104_YEAST	94.84	71.26	59		93.55	65.97	56		91.59	71.5	69
sp|P26637|SYLC_YEAST	91.81	76.7	65		109.75	71.47	76		107	77.5	73
sp|P02994|EF1A_YEAST	91.18	83.19	191		91.25	81.88	164		100.25	74.9	195
sp|P11484|HSP75_YEAST	91.03	78.14	126		106.59	80.91	168		105.97	81.1	188
sp|P07284|SYSC_YEAST	88.5	86.8	72		77.59	87.01	71		85.8	79.9	74
sp|P32589|HSP7F_YEAST	86.97	76.33	83		101.51	82.11	111		84.52	71.3	94
sp|P40825|SYA_YEAST	86.4	76.91	60		88.64	72.84	60		88.28	67.6	65
sp|P23254|TKT1_YEAST	82.38	77.79	95		80.87	76.47	79		66.27	80.9	76
sp|P39954|SAHH_YEAST	80.18	78.84	123		85.7	68.82	121		61.2	77.1	103
sp|P19414|ACON_YEAST	80.11	73.26	72		80.2	71.08	89		78.58	66.3	69
sp|P54115|ALDH6_YEAST	78.76	91.4	89		96.45	89.2	106		83.15	86.8	99
sp|P04806|HXKA_YEAST	78.24	86.39	84		92.29	82.06	124		77.46	80.4	90
sp|P05030|PMA1_YEAST	77.41	47.06	76		76.5	44.88	110		85.1	52	109
sp|P38720|6PGD1_YEAST	76.72	89.98	73		90.75	89.57	100		73.86	86.7	87
sp|P38891|BCA1_YEAST	76.48	86.51	60		68.28	87.02	73		72.06	86.3	67
sp|P38972|PUR4_YEAST	75.52	59.43	51		108.82	70.25	69		97.41	63.7	65
sp|P15180|SYKC_YEAST	75.45	74.11	57		82.43	71.57	67		83.48	78.3	69
sp|P11154|PYC1_YEAST	75.38	60.44	50		26.8	66.21	65		82.45	65.7	59
sp|P06168|ILV5_YEAST	74.6	84.81	145		86.95	77.97	166		70.71	86.6	176
sp|P08566|ARO1_YEAST	73.49	47.48	42		106.75	69.08	60		111.73	64.7	63
sp|P38088|SYG_YEAST	73.22	73.48	55		79.7	75.36	67		80.25	75.1	68
sp|P00330|ADH1_YEAST	72.76	93.1	144		87.37	93.1	151		77.96	82.5	138
sp|P38999|LYS9_YEAST	72.48	85.43	50		79.12	89.24	66		72.83	81.4	56
sp|P00931|TRP_YEAST	72.01	84.72	62		71.86	77.37	71		75.35	78.4	73
sp|P46655|SYEC_YEAST	70.19	70.48	47		78.16	72.6	53		73.74	73.7	50
sp|P00815|HIS2_YEAST	69.86	64.21	45		85.12	70.59	59		77.52	69.2	55
sp|P06738|PHSG_YEAST	69.45	67.74	48		88.62	79.49	60		93.15	82.8	61
sp|P04801|SYTC_YEAST	69.36	70.3	49		74.99	71.93	55		76.11	66.8	55
sp|P07245|C1TC_YEAST	68.88	64.8	45		81.24	74.1	50		77.17	69	54
sp|P22515|UBA1_YEAST	68.07	69.63	55		80.41	69.34	67		75.71	69.7	59
sp|P12709|G6PI_YEAST	67.75	84.3	132		83.6	82.85	187		75.75	87.9	167
sp|P32582|CBS_YEAST	66.86	74.16	59		67.35	81.85	79		63.46	81.1	78
sp|P32454|APE2_YEAST	66.66	65.13	41		82.76	66.28	52		72.35	62	49
sp|P06208|LEU1_YEAST	66.64	76.09	59		70.64	76.74	89		70.24	77.2	82
sp|P16862|K6PF2_YEAST	66.19	70.8	78		77.71	76.75	85		67.91	74.8	84
sp|P06105|SC160_YEAST	65.92	50.98	38		66.53	47.63	36		81.43	52.7	45
sp|P07702|LYS2_YEAST	65.77	53.3	42		100.44	70.26	65		89.37	63.6	56
sp|P0CS90|HSP77_YEAST	65.46	73.85	54		82.58	73.24	81		63.04	79.1	69
sp|Q12680|GLT1_YEAST	65.09	40.42	37		96.4	50.44	60		89.54	44.8	58
sp|P16120|THRC_YEAST	65.03	85.6	50		71.72	84.82	66		62.71	77.2	54
sp|P40069|IMB4_YEAST	64.39	52.56	56		81.67	65.41	67		78.37	70.6	60
sp|P07244|PUR2_YEAST	64.12	65.96	48		64.62	73.07	56		60.89	68.2	42
sp|Q01217|ARG56_YEAST	62.69	69.41	43		67.5	74.62	47		65.63	70.7	45
sp|P31688|TPS2_YEAST	61.25	62.05	35		41.59	47.77	26		73.29	69.1	45
sp|Q05506|SYRC_YEAST	60.98	75.78	36		73.47	78.58	44		73.44	76.9	43
sp|P39522|ILV3_YEAST	60.71	85.13	56		64.05	75.21	82		72.5	81.4	73
sp|P13663|DHAS_YEAST	60.62	90.68	74		59.17	87.4	76		57.6	81.9	70
sp|P17709|HXKG_YEAST	60.55	70	59		58.43	82.8	70		56.89	69.6	56
sp|P16140|VATB_YEAST	60.51	77.95	49		62.4	81.24	55		56.82	78.3	57
sp|P41940|MPG1_YEAST	60.34	83.38	62		67.42	76.73	77		54.78	88.1	73
sp|P38708|YHI0_YEAST	60.26	76.6	45		72.07	77.47	47		69.39	77.6	49
sp|P04802|SYDC_YEAST	60.19	71.63	34		65.66	69.66	39		59.88	70.2	34
sp|P32599|FIMB_YEAST	60.08	81.46	47		61.26	74.77	50		53.96	65.7	47
sp|P13188|SYQ_YEAST	59.96	65.27	33		71.93	70.46	42		59.8	62.3	37
sp|P10659|METK1_YEAST	59.36	83.25	42		29.74	85.34	48		27.24	84	47
sp|P38764|RPN1_YEAST	59.35	57.2	33		69.34	62.24	40		66.55	58.8	40
sp|P19882|HSP60_YEAST	59.03	67.13	44		69.55	71.68	67		56.11	71.3	54
sp|P07262|DHE4_YEAST	58.76	90.31	48		64.79	88.55	76		55.79	83.5	69
sp|P34760|TSA1_YEAST	57.88	87.76	74		86.5	91.84	113		60.88	93.4	90
sp|P38009|PUR92_YEAST	57.44	80.41	33		57.33	83.95	37		39.17	83.1	32
sp|P00942|TPIS_YEAST	57.24	87.1	156		83.88	91.53	257		65.3	90.3	224
sp|P38707|SYNC_YEAST	56.31	68.23	41		56.05	61.01	49		54.32	61.6	43
sp|P00360|G3P1_YEAST	56.02	88.25	303		62.71	93.98	394		48.56	90.4	335
sp|P37012|PGM2_YEAST	55.3	74.52	46		63.12	85.76	48		52.87	79.4	49
sp|P49089|ASNS1_YEAST	55.08	63.29	43		75.84	74.3	57		69.37	74.3	57
sp|P53090|ARO8_YEAST	54.79	81.8	48		51.81	85.6	51		62.89	83.6	60
sp|Q03690|CLU_YEAST	54.2	45.73	30		68.36	50.98	39		67.93	47.5	43
sp|P17967|PDI_YEAST	54.07	75.86	48		56.18	74.14	61		58.31	73.6	66
sp|P00830|ATPB_YEAST	54.06	82.39	40		65.03	84.93	49		60.79	82.4	53
sp|P15891|ABP1_YEAST	54	70.1	36		49.8	66.05	35		51.12	68.9	40
sp|P15705|STI1_YEAST	53.24	68.08	49		59.03	73.17	57		60.52	61.3	53
sp|P46367|ALDH4_YEAST	51.51	76.3	36		64.65	87.09	51		57.62	81.5	46
sp|P22768|ASSY_YEAST	51.48	76.43	71		66.21	77.62	89		58.42	71.9	74
sp|Q12122|HOSM_YEAST	51.2	75.91	35		50.11	77.95	38		54.3	74.3	44
sp|P38249|EIF3A_YEAST	51.06	56.85	29		54.54	53.63	33		59.86	62.2	39
sp|P41277|GPP1_YEAST	50.94	88.8	49		58.73	78.4	68		45.8	84.8	59
sp|P10081|IF4A_YEAST	50.87	82.78	50		61.16	81.27	69		56.79	83.8	71
sp|P07263|SYH_YEAST	50.56	69.6	31		56.25	65.02	38		63.82	70.5	38
sp|P39976|DLD3_YEAST	50.38	76.61	36		46.86	80.04	36		46.27	66.3	38
sp|P30624|LCF1_YEAST	50.1	59.14	30		52.19	65.57	31		48.04	64.3	25
sp|P04147|PABP_YEAST	49.2	75.04	41		56.34	76.95	68		46.8	68.1	48
sp|P07251|ATPA_YEAST	49.05	71.74	30		54.16	66.79	39		50.06	59.5	40
sp|P38625|GUAA_YEAST	48.98	79.43	30		51.18	72.38	33		58.32	76	38
sp|Q07551|KAR_YEAST	48.97	80.45	33		51.47	80.77	53		45.48	75.6	45
sp|Q04336|YM54_YEAST	48.64	44.76	26		61.93	55.7	33		55.92	50.4	31
sp|P37291|GLYC_YEAST	48.32	71	47		47.79	72.49	42		41.07	67.8	37
sp|P60010|ACT_YEAST	48.12	78.93	80		50.72	77.6	111		50.59	79.5	101
sp|P04807|HXKB_YEAST	48.06	83.74	56		54.06	84.57	86		49.2	85.4	69
sp|P00950|PMG1_YEAST	47.91	87.85	123		49.59	76.52	146		55.62	77.7	131
sp|P15019|TAL1_YEAST	47.78	76.12	38		56.74	77.01	49		54.21	78.2	47
sp|P04076|ARLY_YEAST	47.28	66.74	39		52.19	60.04	55		46.89	60.3	43
sp|P31116|DHOM_YEAST	47.17	84.12	42		57.86	84.68	56		55.59	81.9	51
sp|P49626|RL4B_YEAST	47.16	61.6	54		57.79	65.47	75		54.72	62.2	74
sp|P06115|CATT_YEAST	47.02	75.8	34		49.45	72.06	34		54	79.5	38
sp|P07267|CARP_YEAST	46.77	68.4	41		55.81	67.16	55		49.03	68.6	50
sp|P21954|IDHP_YEAST	46.7	62.85	32		52.18	70.79	35		58.57	76.9	45
sp|P53852|SYC_YEAST	46.61	65.97	30		67.24	69.1	40		63.7	69.4	40
sp|Q07478|SUB2_YEAST	46.55	71.97	43		50.04	76.46	48		50.56	72.4	53
sp|P54114|ALDH3_YEAST	46.38	76.88	29		56.24	76.48	35		47.63	74.1	35
sp|P15624|SYFB_YEAST	46.11	63.03	38		50.44	65.04	38		46.13	68.4	30
sp|P00817|IPYR_YEAST	45.94	81.88	98		53.57	82.23	79		44.91	80.1	75
sp|Q03104|MSC1_YEAST	45.77	64.13	29		45.11	59.06	34		49.89	62.4	36
sp|P54839|HMCS_YEAST	45.41	69.25	28		43.92	58.04	27		46.02	63.3	30
sp|P52910|ACS2_YEAST	45.33	55.49	28		48.73	57.25	31		50.19	58.1	36
sp|P43616|DUG1_YEAST	45.32	83.58	40		44.78	80.25	46		41.49	76.7	47
sp|P54838|DAK1_YEAST	44.74	64.73	36		48.75	67.47	40		52.81	73.1	46
sp|P23542|AATC_YEAST	44.58	81.82	36		41.8	80.14	35		40.67	82.5	35
sp|P32861|UGPA1_YEAST	44.58	69.74	50		45.42	75.55	55		43.3	69.3	57
sp|P38715|GRE3_YEAST	44.37	86.24	33		43.11	90.83	33		47.76	86.5	34
sp|Q12273|YO11B_YEAST	0	32.02	48		0.01	38.97	68		41.28	34.4	51
sp|P00958|SYMC_YEAST	44.22	61.12	31		58.46	66.58	37		55.09	71	39
sp|P32074|COPG_YEAST	44.09	48.98	24		44.87	46.63	29		49.6	51.4	31
sp|P34216|EDE1_YEAST	43.94	34.76	28		55.64	38.38	38		46.03	26.9	25
sp|P38295|MCFS2_YEAST	43.58	74.06	36		44.44	80.71	37		45.53	76.5	36
sp|P49723|RIR4_YEAST	43.49	74.78	35		43.11	75.65	38		39.85	75.1	37
sp|P29311|BMH1_YEAST	42.54	95.51	61		46.48	94.01	74		41.03	96.3	73
sp|P38427|TSL1_YEAST	42.47	42.81	32		45.1	42.99	31		52.28	45.4	33
sp|Q06142|IMB1_YEAST	42.47	45.76	26		36.43	48.2	26		38.1	44	26
sp|P14832|CYPH_YEAST	42.45	82.1	133		35.35	90.12	61		33.13	74.7	57
sp|P32565|RPN2_YEAST	42.32	37.67	23		42.01	43.17	26		48.78	50.7	29
sp|P36421|SYYC_YEAST	42.26	79.7	34		52.22	75.63	55		44.82	73.6	51
sp|P38968|SEC31_YEAST	42.17	40.46	23		48.17	38.26	28		46.46	39.8	26
sp|P34167|IF4B_YEAST	42.06	76.38	26		48.91	72.71	30		42.26	67	26
sp|P29547|EF1G1_YEAST	42.02	70.6	27		42.21	70.36	30		38.28	64.6	24
sp|P04840|VDAC1_YEAST	42.02	95.05	38		41.9	93.29	43		43.23	95.1	43
sp|P16474|GRP78_YEAST	41.95	50.29	29		57.36	64.52	42		61.5	52.1	48
sp|P38788|SSZ1_YEAST	41.38	71.93	33		48.8	81.04	40		44.99	71.9	34
sp|P38631|FKS1_YEAST	41.34	32.09	23		36.62	28.04	21		54.85	33.6	33
sp|P38011|GBLP_YEAST	40.82	89.97	52		45.53	94.67	76		43.7	93.4	68
sp|P47143|ADK_YEAST	40.42	86.47	66		49	82.94	91		46.94	87.9	86
sp|P47079|TCPQ_YEAST	40.26	66.2	25		48.02	71.3	28		48.99	73.9	28
sp|P40047|ALDH5_YEAST	39.87	77.12	26		42.44	75	35		42.72	73.9	32
sp|P41807|VATH_YEAST	39.22	67.78	29		45.91	67.99	31		49.01	72.4	34
sp|P23248|RS3A2_YEAST	39.21	85.1	33		42.67	77.65	40		44.94	67.8	43
sp|P39077|TCPG_YEAST	39.14	71.35	22		41.89	67.98	27		38.96	65.2	25
sp|P32497|EIF3C_YEAST	38.95	43.23	24		48.42	49.63	34		50.74	47.3	38
sp|P25443|RS2_YEAST	38.85	66.93	47		40.9	67.32	51		34.87	71.3	60
sp|P37302|APE3_YEAST	38.78	55.49	29		41.06	48.04	32		35.09	47.9	26
sp|P15625|SYFA_YEAST	38.73	72.17	30		46.82	73.16	38		39.22	73.4	36
sp|Q12118|SGT2_YEAST	38.36	83.24	34		40.88	80.35	43		48.89	90.8	41
sp|P80210|PURA_YEAST	38.18	66.74	27		41.97	69.75	28		33.11	67.4	23
sp|Q12363|WTM1_YEAST	38.15	75.51	39		41.24	75.06	31		38.65	74.1	31
sp|P11412|G6PD_YEAST	37.87	63.17	24		40.56	62.97	25		42.22	69.9	27
sp|P33734|HIS5_YEAST	37.55	60.87	21		58.74	81.52	36		56	75	29
sp|P50095|IMDH3_YEAST	37.37	65.58	29		47.16	76.86	39		46.46	75.5	40
sp|P17536|TPM1_YEAST	37.32	74.87	40		38.09	78.89	43		36.07	76.4	36
sp|Q12230|LSP1_YEAST	37.3	66.86	29		38.13	59.53	34		39.24	65.7	36
sp|P06634|DED1_YEAST	37.25	69.54	21		41.93	64.57	24		47.32	77	33
sp|Q00764|TPS1_YEAST	37.23	70.91	31		35.87	70.51	30		38.08	65.3	39
sp|P39730|IF2P_YEAST	37.18	47.5	21		44.56	53.39	27		51.19	53.6	31
sp|P00890|CISY1_YEAST	37.14	64.72	30		33.8	50.94	25		32.01	61.6	24
sp|P09624|DLDH_YEAST	37.08	77.56	21		30.2	57.11	20		32.22	51.9	20
sp|P32449|AROG_YEAST	37.02	75.14	44		40.27	70.81	46		35.93	68.7	41
sp|P14742|GFA1_YEAST	36.85	58.02	21		32.39	45.05	19		47.34	61.8	26
sp|P38791|DHYS_YEAST	36.79	71.06	21		43.09	78.29	25		35.39	69	25
sp|P29453|RL8B_YEAST	36.74	72.66	35		6	59.77	34		6	59	35
sp|P38115|ARA1_YEAST	36.63	82.27	25		36.89	77.62	33		38.74	82	33
sp|P46672|G4P1_YEAST	36.45	65.43	29		32.82	60.37	31		31.24	59	26
sp|P53912|YNN4_YEAST	36.13	75.27	28		30.2	81.38	26		33.27	81.7	28
sp|P07991|OAT_YEAST	36.03	76.42	26		35.15	78.07	22		38.7	75.5	23
sp|P41338|THIL_YEAST	36	73.37	26		39.35	77.89	34		38	76.1	31
sp|P17505|MDHM_YEAST	36	74.25	32		40.29	78.44	25		38.49	86.5	28
sp|P38934|BFR1_YEAST	35.93	67.45	21		33.29	61.49	20		33.06	61.5	21
sp|P49090|ASNS2_YEAST	35.73	67.31	42		41.21	77.8	54		36.76	72.9	46
sp|P38013|AHP1_YEAST	35.7	92.61	98		49.83	96.02	146		37.29	81.8	119
sp|P20967|ODO1_YEAST	35.6	39.25	21		35.49	41.32	19		42.47	43.4	28
sp|P40054|SERA_YEAST	35.24	65.03	29		42.14	72.49	37		34.03	62.5	28
sp|P30822|XPO1_YEAST	35.03	50.74	22		44.88	53.69	29		47.56	62.6	29
sp|P31373|CYS3_YEAST	35.03	76.9	52		34.77	82.99	40		36.59	75.6	49
sp|Q03558|OYE2_YEAST	34.94	79	32		38.06	78.5	43		39.59	74.8	40
sp|Q05911|PUR8_YEAST	34.93	60.17	22		34.6	50.83	20		31.45	60.2	24
sp|P22203|VATE_YEAST	34.93	72.96	29		33.37	78.11	36		31.07	78.1	32
sp|P39683|NPT1_YEAST	34.91	69	18		35.03	68.53	21		34.09	70.2	20
sp|P05750|RS3_YEAST	34.73	62.92	32		37.01	78.75	47		37.56	73.3	48
sp|P10592|HSP72_YEAST	34.68	79.5	224		34.59	79.5	326		34.11	78.1	261
sp|P37292|GLYM_YEAST	34.64	60.82	25		33.68	63.27	22		37.43	74.1	24
sp|P14126|RL3_YEAST	34.57	61.5	45		37.24	54.01	39		37.37	53	46
sp|P24280|SEC14_YEAST	34.48	75.33	22		36.71	83.55	20		34.3	89.1	19
sp|Q04728|ARGJ_YEAST	34.45	57.6	21		42.69	60.54	26		37.42	58.5	24
sp|P29952|MPI_YEAST	34.28	74.36	30		46.94	73.66	30		41.04	73.2	33
sp|P54113|PUR91_YEAST	34.22	71.4	29		45.68	76.14	36		56.27	76.7	33
sp|P33330|SERC_YEAST	34.19	79.24	25		36.52	77.72	30		43.35	86.3	29
sp|Q12074|SPEE_YEAST	34	88.74	22		35.06	90.44	26		37.03	89.4	35
sp|P07257|QCR2_YEAST	33.77	68.48	19		44.05	73.37	22		40.61	85.9	23
sp|P36008|EF1G2_YEAST	33.76	69.17	33		32.02	64.08	35		27.1	54.9	32
sp|P40531|GVP36_YEAST	33.43	88.34	30		34.86	87.73	31		32.09	80.1	30
sp|P39958|GDI1_YEAST	33.32	74.94	21		38.97	72.95	25		34.48	67	20
sp|P00924|ENO1_YEAST	33.3	94.97	474		41.23	89.02	677		37.61	90.9	619
sp|P10869|AK_YEAST	33.24	58.63	21		34.07	60.53	23		43.4	67.4	29
sp|P00899|TRPE_YEAST	33.02	73.57	22		37.74	67.26	25		42.15	73.2	26
sp|P06103|EIF3B_YEAST	32.91	54.52	28		45.01	57.4	30		41.47	54.1	27
sp|Q12213|RL7B_YEAST	32.67	72.54	50		32.86	67.21	35		25.82	70.5	36
sp|P46654|RSSA2_YEAST	32.38	88.89	51		32.45	84.13	43		26.35	86.9	46
sp|P00498|HIS1_YEAST	32.18	78.11	19		30.75	80.13	24		32.92	83.2	23
sp|P17649|GABAT_YEAST	31.94	71.97	18		45.01	77.28	25		37.05	68.4	24
sp|Q05016|YM71_YEAST	31.93	85.77	40		38.07	71.16	31		37.96	80.5	29
sp|Q04792|DCE_YEAST	31.88	55.9	26		37.65	51.45	25		39.43	55.2	29
sp|P14843|AROF_YEAST	31.87	80.81	28		36.12	76.76	30		34.64	73.2	20
sp|P21524|RIR1_YEAST	31.82	38.74	20		43.03	46.85	30		39.56	48.4	24
sp|P08524|FPPS_YEAST	31.78	71.02	25		31	77.27	30		30.62	74.2	26
sp|P39076|TCPB_YEAST	31.74	61.29	19		43.67	65.09	26		46.9	69.5	25
sp|P28272|PYRD_YEAST	31.72	78.66	44		38.78	78.34	80		36.02	87.3	74
sp|P32614|FRDS_YEAST	31.64	58.72	23		39.08	74.68	31		37.08	73.4	26
sp|P32481|IF2G_YEAST	31.64	43.64	17		37.23	55.22	23		33.66	50.7	20
sp|P53111|ARI1_YEAST	31.5	73.2	20		30.02	74.64	19		28.21	68	20
sp|P40413|TCPE_YEAST	31.38	63.7	22		31.74	64.77	20		32.42	61.6	21
sp|P40495|LYS12_YEAST	31.34	73.58	23		36.43	79.78	24		39.48	77.1	26
sp|P36016|LHS1_YEAST	31.29	36.89	19		35.74	46.42	24		32.4	41.2	23
sp|Q07653|HBT1_YEAST	31.22	39.96	21		21.9	32.12	14		25.16	41.1	16
sp|P38205|NCL1_YEAST	31.1	57.31	17		48.29	61.11	25		53.27	69.3	29
sp|P24783|DBP2_YEAST	31.04	64.84	20		30.28	52.56	20		33.52	64.7	20
sp|P19358|METK2_YEAST	30.94	88.54	77		66.21	86.2	89		58.36	85.9	82
sp|Q12109|SYWC_YEAST	30.91	68.98	17		32.23	67.59	20		27.69	67.4	16
sp|Q03103|ERO1_YEAST	30.89	48.13	19		27.85	44.58	19		34.57	46	25
sp|P32337|IMB3_YEAST	30.84	34.53	15		46.24	48.12	26		48.61	49.7	27
sp|P17555|CAP_YEAST	30.79	66.54	21		40.4	60.65	32		36.12	54.6	27
sp|P26321|RL5_YEAST	30.73	65.66	58		38.49	69.7	69		42.71	62.3	69
sp|P36013|MAOM_YEAST	30.61	61.29	23		42.23	73.24	23		40.49	74.4	27
sp|P41810|COPB_YEAST	30.6	41.73	21		38.02	34.12	22		38.2	43.7	25
sp|P18544|ARGD_YEAST	30.57	69.98	20		38.67	73.29	32		32.54	66.4	24
sp|P00445|SODC_YEAST	30.32	92.86	85		27.91	99.35	64		30.39	87	59
sp|P20051|PYRC_YEAST	30.32	70.88	21		28.68	62.64	18		33.47	67.9	19
sp|P12612|TCPA_YEAST	30.14	60.47	15		32.66	62.97	18		36.42	67.1	24
sp|P54885|PROA_YEAST	30.12	69.74	19		33.37	72.81	21		33.44	71.1	23
sp|P23301|IF5A1_YEAST	30.05	81.53	43		39.39	87.26	48		36.56	77.1	48
sp|P07342|ILVB_YEAST	29.98	52.84	18		37.23	49.64	24		38.94	47.3	25
sp|P39935|IF4F1_YEAST	29.95	55.88	23		30.44	41.81	19		34.5	44.8	26
sp|P53128|MTHR2_YEAST	29.89	62.5	20		34.16	69.33	21		38.59	67.5	24
sp|P39676|FHP_YEAST	29.82	66.92	16		26.53	73.68	17		24.24	59.4	14
sp|P28777|AROC_YEAST	29.57	79.52	19		28.04	56.12	22		31.09	71.5	24
sp|P37303|GLY1_YEAST	29.51	71.83	24		31.41	78.55	26		32.24	84	27
sp|P0CX36|RS4B_YEAST	29.43	71.65	30		32.09	58.62	32		27.65	57.9	32
sp|P07283|PMM_YEAST	29.43	85.43	18		33.72	88.58	29		30.53	79.5	24
sp|P07170|KAD2_YEAST	29.39	79.28	37		38.87	66.67	36		34.49	76.1	42
sp|Q00055|GPD1_YEAST	29.23	78.52	26		34.11	83.89	29		31.18	71.4	25
sp|P04050|RPB1_YEAST	29.16	32.72	16		43.03	32.83	26		45.27	33.5	26
sp|P32527|ZUO1_YEAST	29.05	64.67	16		34.1	55.2	20		37.34	59.6	21
sp|Q08245|ZEO1_YEAST	29.05	71.68	33		24.09	70.8	38		22.3	61.1	34
sp|P38219|OLA1_YEAST	28.95	72.08	21		39.23	68.53	26		42.82	79.4	28
sp|Q08972|NEW1_YEAST	28.84	47.41	17		40.25	38.63	24		39.1	37.7	23
sp|P53598|SUCA_YEAST	28.8	79.64	18		32.12	83.59	22		30.04	82.4	18
sp|P25087|ERG6_YEAST	28.74	61.1	19		35.97	68.41	22		35.39	74.9	24
sp|P18899|DDR48_YEAST	28.67	60.47	123		38	62.79	189		40.16	64.2	185
sp|Q12460|NOP56_YEAST	28.32	56.35	21		41.64	74.6	27		38.59	67.1	29
sp|P53839|GOR1_YEAST	28.26	84.29	21		18.69	72.57	11		26.95	76.3	17
sp|Q12458|YPR1_YEAST	28.23	67.63	20		32.85	69.87	24		33.78	77.2	19
sp|P11745|RNA1_YEAST	28.2	63.88	16		39.64	74.45	26		41.71	74.9	26
sp|P15992|HSP26_YEAST	28.17	76.64	25		36.13	80.37	46		38.62	72.4	43
sp|P0CX38|RS6B_YEAST	28.14	66.53	19		30.86	59.75	29		35.69	60.6	32
sp|P26783|RS5_YEAST	28.01	67.56	50		30.61	67.11	71		29.44	77.8	64
sp|P02557|TBB_YEAST	28	57.99	27		30.51	49.02	29		29.83	63.7	32
sp|P14904|AMPL_YEAST	27.94	64.2	19		34.58	68.09	21		30.26	56	19
sp|P53252|PIL1_YEAST	27.78	64.01	23		28.31	69.03	29		27.84	58.7	40
sp|P16649|TUP1_YEAST	27.58	40.11	14		35.09	51.05	22		28.61	46.6	17
sp|P07256|QCR1_YEAST	27.44	64.33	21		39.18	69.58	30		33.17	71.6	29
sp|Q01532|BLH1_YEAST	27.43	63.15	19		35.19	74.74	21		34.51	59.8	24
sp|P43593|UBP6_YEAST	27.32	51.5	15		27.85	62.53	18		30.18	56.3	19
sp|P53008|CWH41_YEAST	27.3	44.66	14		30.49	36.73	17		23.31	40.8	13
sp|P23615|SPT6_YEAST	27.05	29.98	16		28.82	33.49	19		26.69	31	18
sp|P09938|RIR2_YEAST	27.01	57.64	21		32.13	64.91	27		28.18	60.2	18
sp|P0CX44|RL1B_YEAST	26.99	49.31	26		25.89	52.53	25		27.04	48.4	30
sp|P40024|ARB1_YEAST	26.93	45.08	14		40.76	57.7	23		43.81	60	25
sp|P42943|TCPH_YEAST	26.77	49.27	15		39.67	65.64	25		39.19	62.9	24
sp|P41921|GSHR_YEAST	26.67	70.6	19		26.61	66.46	16		28.68	67.1	18
sp|P31383|2AAA_YEAST	26.56	64.88	20		34.44	64.09	27		34.75	58	26
sp|Q03161|YMY9_YEAST	26.54	70.71	16		35.54	79.12	22		30.51	83.8	20
sp|P15454|KGUA_YEAST	26.5	77.54	18		30.43	81.28	24		24.54	83.4	19
sp|P49367|LYS4_YEAST	26.49	52.53	15		33.73	58.01	18		29.98	46.3	18
sp|P27472|GYS2_YEAST	26.34	46.95	15		28.19	35.04	16		33.89	45.3	21
sp|P20449|DBP5_YEAST	26.3	64.73	17		25.5	60.79	15		29.15	62.9	17
sp|P29509|TRXB1_YEAST	26.22	81.5	22		33.88	88.09	31		28	83.1	26
sp|Q04869|YM94_YEAST	26.22	72.21	25		30.38	84.81	25		35.43	79.9	30
sp|P47912|LCF4_YEAST	26.15	41.35	16		25.72	36.46	16		30.23	43.5	22
sp|P05755|RS9B_YEAST	26.11	63.08	25		26.34	53.85	24		26.49	53.3	23
sp|P22943|HSP12_YEAST	26.09	89.91	59		24.65	74.31	76		24.31	80.7	91
sp|Q08977|YP260_YEAST	26.08	50.27	13		28.69	59.53	16		21.48	57.5	13
sp|P38795|NADE_YEAST	26.02	37.39	17		28.88	34.31	18		35.66	43.8	23
sp|P16603|NCPR_YEAST	26	35.31	13		38.25	55.57	24		36.87	53.3	22
sp|P38777|FSH1_YEAST	26	70.37	18		29.17	80.66	17		30.46	73.3	17
sp|P13298|PYRE_YEAST	25.91	70.8	20		21.73	81.86	17		23.46	73.5	23
sp|P11075|SEC7_YEAST	25.89	27.73	14		36.78	28.32	22		52.66	35.5	31
sp|P18239|ADT2_YEAST	25.86	61.01	20		32.11	66.35	29		35.44	61.6	27
sp|P16550|APA1_YEAST	25.84	81.62	17		27.69	87.54	17		28	85.4	16
sp|P36060|MCR1_YEAST	25.8	83.11	18		21.7	75.5	17		20.79	61.3	17
sp|P39533|ACON2_YEAST	25.74	46.13	14		31.88	44.99	20		36.52	55.1	22
sp|P53278|YG3A_YEAST	25.72	38.6	15		26.07	37.01	14		25.57	40.4	14
sp|P40327|PRS4_YEAST	25.57	51.72	15		23.59	46	16		27.48	52	15
sp|Q12068|GRE2_YEAST	25.53	70.18	18		29.4	61.11	20		35.98	69.6	24
sp|P25567|SRO9_YEAST	25.49	49.31	16		26.16	54.84	17		25.6	45.6	18
sp|P48589|RS12_YEAST	25.38	74.13	27		25.26	81.12	32		24.21	74.1	32
sp|P08417|FUMH_YEAST	25.02	47.95	15		31.37	52.46	20		27.73	53.5	19
sp|P40212|RL13B_YEAST	24.93	71.36	17		33.75	61.31	30		28.36	62.8	23
sp|P09733|TBA1_YEAST	24.88	60.85	19		31.64	63.76	24		34.08	71.6	25
sp|Q12154|GET3_YEAST	24.88	74.01	13		25.49	61.86	19		26.06	67.5	21
sp|P25491|MAS5_YEAST	24.81	58.92	15		28.94	60.64	19		32.06	66.3	17
sp|P31412|VATC_YEAST	24.72	65.82	19		33.55	64.03	24		34.03	67.1	21
sp|P22202|HSP74_YEAST	24.71	64.8	82		42.52	74.14	124		41.54	68.4	85
sp|Q05905|HRI1_YEAST	24.52	76.23	22		29.89	92.62	27		28.59	81.6	29
sp|Q02326|RL6A_YEAST	24.45	64.77	16		6.27	69.89	17		21.84	58.5	15
sp|P36114|YKR18_YEAST	24.32	37.52	12		32.75	30.62	16		27	36.7	15
sp|P39101|CAJ1_YEAST	24.23	61.89	12		20.04	57.8	11		19.2	47.6	13
sp|P12945|NAT1_YEAST	24.19	40.05	12		22.96	38.99	14		30.1	43	19
sp|P02406|RL28_YEAST	24.19	61.74	19		20.42	63.09	14		21.1	67.8	17
sp|P0CX46|RL2B_YEAST	24.13	59.84	23		24.27	59.84	27		24.03	42.5	23
sp|P47018|MTC1_YEAST	24.11	57.32	13		28.96	49.37	19		25.93	51.5	14
sp|Q04175|SXM1_YEAST	24.1	32.2	18		32.56	31.89	20		30.32	33.2	18
sp|P32473|ODPB_YEAST	24.1	76.23	12		24.15	72.4	14		25.86	71.9	19
sp|P21243|PSA1_YEAST	24.09	79.76	20		28.92	75	24		25.77	74.6	22
sp|P53303|ZPR1_YEAST	24.08	40.95	13		30.09	54.12	16		27.97	53.3	17
sp|P47120|DOHH_YEAST	24.06	62.46	16		29.76	71.69	23		30.05	72.9	21
sp|P20606|SAR1_YEAST	24	90.53	19		26	83.16	26		24.93	83.2	22
sp|P33298|PRS6B_YEAST	23.85	50.93	12		22.21	64.72	18		21.81	60.3	15
sp|P32471|EF1B_YEAST	23.82	65.05	46		26.04	63.11	59		26.58	69.9	47
sp|P38787|PANE_YEAST	23.64	66.75	16		33.7	65.96	22		29.96	55.9	20
sp|P26786|RS7A_YEAST	23.63	62.11	24		28.59	66.84	28		26.16	71.1	31
sp|P38431|IF5_YEAST	23.63	62.22	17		25.65	59.51	22		25.99	65.4	22
sp|P00729|CBPY_YEAST	23.58	43.61	23		27.65	47.56	30		26.72	36.1	27
sp|P32263|P5CR_YEAST	23.56	86.01	22		26.01	86.71	25		25.57	88.5	25
sp|P15873|PCNA_YEAST	23.47	65.12	12		24.36	69.38	15		22.88	66.7	14
sp|Q02821|IMA1_YEAST	23.4	43.91	14		27.43	59.41	19		26.14	51.5	18
sp|P32368|SAC1_YEAST	23.36	50.56	13		23	42.05	14		25.75	55.2	15
sp|P23641|MPCP_YEAST	23.26	67.52	22		40.11	84.89	39		33.32	91.3	28
sp|P23776|EXG1_YEAST	23.24	52.23	18		27.42	58.48	27		32.02	58.5	26
sp|P27614|CBPS_YEAST	23.11	39.41	13		22.7	35.42	15		22.85	37.7	13
sp|P32377|MVD1_YEAST	23.09	54.29	19		26.15	62.12	20		28.24	69.4	19
sp|P53622|COPA_YEAST	23.05	35.22	16		38.09	42.63	20		37.45	45.1	25
sp|Q04894|ADH6_YEAST	22.9	75.56	20		30.43	72.78	20		28.67	74.2	18
sp|P41811|COPB2_YEAST	22.85	49.38	13		28.33	42.63	15		32.12	51	20
sp|P0CX56|RS18B_YEAST	22.76	80.14	31		20.01	76.03	36		16.03	63.7	38
sp|P54783|ALO_YEAST	22.75	38.4	12		35.05	51.52	23		28.33	42.8	19
sp|P47169|MET5_YEAST	22.69	31.62	11		45.58	41.61	25		28.2	29.8	15
sp|P41805|RL10_YEAST	22.53	57.01	33		22.37	53.85	40		17.32	43	35
sp|Q04947|RTN1_YEAST	22.41	51.86	16		27.62	53.22	22		26.28	67.1	21
sp|P39986|ATC6_YEAST	22.4	30.78	15		33.44	45.02	18		30.97	43.2	17
sp|P25293|NAP1_YEAST	22.28	56.12	12		34.6	64.03	23		31.41	62.4	22
sp|P39015|STM1_YEAST	22.21	71.06	18		18.34	64.84	25		15.74	50.6	13
sp|P35691|TCTP_YEAST	22.19	82.63	22		27.98	89.22	50		20.01	80.8	35
sp|P25375|PRTD_YEAST	22.14	42.42	11		34	46.35	20		34.19	52.1	20
sp|P43535|GCN20_YEAST	22.14	46.54	15		31.57	58.51	19		27.01	63.6	20
sp|P53228|TAL2_YEAST	22.08	61.56	14		29.36	74.47	18		26.2	73.9	17
sp|P53691|PPID_YEAST	22.06	59.3	23		29.23	73.05	26		25.98	70.6	27
sp|P39079|TCPZ_YEAST	22.06	46.89	11		31.9	64.65	19		28.04	68.5	18
sp|P35719|MRP8_YEAST	22.06	79.45	13		25.55	79	17		23.92	79.9	17
sp|P53184|PNC1_YEAST	22.06	71.3	22		21.08	80.09	26		23.26	66.7	27
sp|P05759|RS27A_YEAST	22.02	69.08	20		23.15	70.39	24		20.01	68.4	22
sp|P28241|IDH2_YEAST	22.01	73.44	14		24.18	60.7	16		23.64	68	15
sp|Q12335|PST2_YEAST	22	88.89	19		20.79	94.95	27		20.61	89.4	24
sp|P53981|YNB0_YEAST	21.93	74.69	16		27.58	73.44	21		20.44	69.7	15
sp|P34223|UBX1_YEAST	21.88	65.25	14		25.97	75.18	20		20.27	59.1	14
sp|P32179|MET22_YEAST	21.74	59.94	13		18.03	46.5	10		20.89	61.9	12
sp|P33307|CSE1_YEAST	21.54	41.35	13		22.81	35.73	15		20.09	34.9	12
sp|P00431|CCPR_YEAST	21.48	64.27	11		27.21	72.58	17		20.23	68.1	11
sp|Q05050|EIS1_YEAST	21.47	36.18	13		19.78	40.45	13		21.04	36.9	15
sp|P32379|PSA5_YEAST	21.4	75.77	14		21.71	76.54	15		19.99	81.2	17
sp|P43123|UAP1_YEAST	21.38	69.6	13		32.56	59.54	19		29.01	72.5	21
sp|P14127|RS17B_YEAST	21.37	58.09	19		20.03	63.97	23		24.06	64.7	21
sp|P32288|GLNA_YEAST	21.2	66.22	20		22.34	60.81	22		18.27	59.7	21
sp|Q04432|HSP31_YEAST	21.09	71.73	12		25.58	79.32	17		24.44	77.2	17
sp|P22146|GAS1_YEAST	21.07	41.86	19		25.41	41.14	24		19.88	28.3	21
sp|P43590|YFH6_YEAST	20.96	40.19	14		22.88	55.51	15		26.36	55.9	15
sp|P23180|AIM17_YEAST	20.95	42.58	11		22.09	61.72	13		17.69	52	11
sp|Q12499|NOP58_YEAST	20.91	48.53	13		24	45.99	19		26.15	59.7	16
sp|P33416|HSP78_YEAST	20.89	45.62	11		23	40.57	14		24.03	44.4	14
sp|Q06252|YL179_YEAST	20.87	70.65	16		27.04	72.64	23		16.07	69.7	14
sp|P14306|CPYI_YEAST	20.72	87.67	19		25.7	91.78	20		27.39	85.8	18
sp|P09232|PRTB_YEAST	20.58	28.66	15		25.79	31.81	17		14.57	36.2	14
sp|P38845|CRP1_YEAST	20.5	49.89	14		19.32	52.04	14		20.47	52.7	12
sp|P14065|GCY1_YEAST	20.45	68.59	14		22.29	71.47	19		22.04	69.9	13
sp|P38858|SOL3_YEAST	20.42	73.49	15		21.76	71.49	15		21.9	80.7	17
sp|P53312|SUCB_YEAST	20.41	59.48	12		25.82	52.46	17		29.14	70.5	21
sp|P38998|LYS1_YEAST	20.25	65.68	18		25.16	70.78	18		27.32	67	21
sp|P0CX54|RL12B_YEAST	20.15	75.76	20		21.99	63.03	27		23.29	70.9	33
sp|Q06523|YP148_YEAST	20.09	58.16	11		28.52	53.1	15		23.41	59.3	13
sp|P53141|MLC1_YEAST	20.08	86.58	15		24.03	84.56	17		23.76	79.9	15
sp|P47176|BCA2_YEAST	20.07	79.26	15		32	64.36	23		24.72	66.2	18
sp|Q01662|MAP1_YEAST	20.03	57.36	14		13.54	40.83	12		18.34	60	10
sp|P53081|GTPC1_YEAST	20.03	67.71	11		18.71	64.93	12		14.19	48.3	10
sp|P33315|TKT2_YEAST	20.02	49.63	15		22.58	50.66	15		21.61	36.4	12
sp|P0C0W9|RL11A_YEAST	20.02	72.41	21		0	64.94	24		21.56	69	23
sp|P47096|3HAO_YEAST	20.02	83.62	13		20.37	86.44	21		18.77	81.4	17
sp|P05150|OTC_YEAST	20.01	59.17	12		23.88	66.57	16		25.1	66.6	17
sp|P01120|RAS2_YEAST	20.01	63.98	16		20.09	63.66	13		18	52.8	12
sp|P38217|IMB2_YEAST	20	27.89	10		30.14	43.46	18		16.41	28.1	10
sp|Q08225|DPP3_YEAST	19.9	56.82	13		21.84	53.87	16		24.8	61.7	15
sp|P31382|PMT2_YEAST	19.86	27.93	11		14.18	26.75	8		19.01	24.2	14
sp|P26784|RL16A_YEAST	19.8	52.76	13		19.13	51.76	13		11.71	37.2	11
sp|Q04178|HPRT_YEAST	19.75	84.62	13		22.05	86.88	11		19.52	76.5	11
sp|Q03148|SNZ1_YEAST	19.7	77.1	12		15.47	62.96	11		14.77	78.5	9
sp|P40185|MMF1_YEAST	19.68	88.28	21		20.03	82.07	26		19.15	92.4	24
sp|P32590|HSP79_YEAST	19.62	59.31	22		28.27	59.16	29		33.85	57	33
sp|P00812|ARGI_YEAST	19.6	66.67	13		12.55	46.85	8		15.11	54.4	9
sp|P53920|NM111_YEAST	19.6	27.58	11		14.62	23.97	11		20.66	32.6	14
sp|Q08179|MDM38_YEAST	19.59	47.12	12		24.94	51.66	15		22.95	52.2	15
sp|P25294|SIS1_YEAST	19.49	46.88	13		28.28	47.44	15		29.59	53.7	17
sp|P40217|EIF3I_YEAST	19.48	64.27	12		33.06	77.52	19		30.31	76.4	18
sp|P0CX48|RS11B_YEAST	19.36	68.59	14		22.21	74.36	13		22.37	71.8	15
sp|P00937|TRPG_YEAST	19.3	65.29	12		30.5	67.98	22		26.84	65.5	18
sp|Q10740|LKHA4_YEAST	19.21	38.15	12		27.5	46.5	18		30.91	41.4	19
sp|P0C2H7|RL27B_YEAST	19.19	58.82	24		14.46	59.56	14		12.46	55.9	15
sp|P07258|CARA_YEAST	19.13	61.31	13		21.16	46.47	15		24.25	61.6	14
sp|Q99258|RIB3_YEAST	19.11	88.46	15		22	73.08	16		20.27	63.5	13
sp|Q12447|PAA1_YEAST	19.09	73.3	11		19.78	74.35	12		21.3	75.9	12
sp|P34227|PRX1_YEAST	19.05	64.37	9		21.46	69.73	14		21.8	69.7	11
sp|P41920|YRB1_YEAST	19.02	75.62	18		22.37	57.71	17		16.24	59.7	12
sp|P0CX85|RL35B_YEAST	18.98	58.33	11		18.06	48.33	12		15.08	49.2	11
sp|Q07505|DLHH_YEAST	18.89	76.19	12		21.12	72.89	15		24.05	87.6	17
sp|P51401|RL9B_YEAST	18.83	66.49	19		2	61.78	19		17.84	67.5	15
sp|Q06151|DCPS_YEAST	18.81	62.86	21		26.71	65.71	24		22.13	57.1	17
sp|P15646|FBRL_YEAST	18.78	68.81	10		19.79	63.61	10		24.74	75.5	17
sp|P37262|SOL2_YEAST	18.65	73.02	12		16	53.02	8		16.01	51.4	10
sp|P19881|PNPP_YEAST	18.6	66.03	9		19.48	62.5	13		18.94	59	11
sp|P15703|BGL2_YEAST	18.56	39.94	12		18.17	42.49	10		17.52	45.1	12
sp|P46990|RL17B_YEAST	18.49	72.28	24		16.01	57.07	20		14.12	64.1	20
sp|P06367|RS14A_YEAST	0	72.99	17		0	64.96	32		19.5	76.6	27
sp|P22217|TRX1_YEAST	18.47	81.55	12		22.02	91.26	19		22.28	87.4	17
sp|Q12211|PUS1_YEAST	18.44	41.18	13		26.93	60.66	15		20.33	43.8	11
sp|P40093|YEY6_YEAST	18.26	64.5	12		21.09	45.86	11		14.7	39.1	9
sp|Q12250|RPN5_YEAST	18.19	49.66	10		25.18	45.39	14		22	42	13
sp|Q12496|YO098_YEAST	18.16	26.52	12		27.74	36.93	17		19.3	38.4	14
sp|P16622|HEMH_YEAST	18.15	66.92	11		31.86	76.08	22		21.64	72.5	15
sp|Q08985|SAM4_YEAST	18.12	63.69	11		22.09	63.69	12		18.03	52	10
sp|P32327|PYC2_YEAST	18.09	57.29	55		87.52	68.05	65		30.26	67.9	55
sp|P0CX83|RL19B_YEAST	18.09	70.37	12		10.16	36.51	11		12.02	54	13
sp|Q01560|NOP3_YEAST	18.04	38.65	12		17.69	44.69	12		16.03	43.2	14
sp|P32835|GSP1_YEAST	18.03	78.54	12		21.35	73.06	28		18.02	71.2	27
sp|P38075|PDX3_YEAST	18.03	74.56	10		22.06	70.61	12		19.75	61	12
sp|P38993|FET3_YEAST	18.01	29.09	13		16.84	22.96	15		12	20.6	9
sp|Q08601|MCA1_YEAST	18.01	40.97	10		14	32.18	11		19.86	42.4	11
sp|P14020|DPM1_YEAST	18	64.79	10		22.03	61.42	13		18.94	55.4	12
sp|P32563|VPH1_YEAST	18	36.43	9		30.54	37.62	15		28.59	30.6	14
sp|P0CX52|RS16B_YEAST	18	48.95	14		18.84	57.34	20		13.81	49.7	16
sp|P38174|MAP2_YEAST	17.99	61.76	12		19.07	43.23	11		15.74	50.1	10
sp|P28274|URA7_YEAST	17.87	48.36	13		23.01	56.65	20		24.86	59.8	17
sp|P38701|RS20_YEAST	17.87	66.94	16		12.64	47.11	17		18.86	49.6	29
sp|P32775|GLGB_YEAST	17.83	36.22	12		23.79	41.05	16		21.81	37.2	13
sp|P32860|NFU1_YEAST	17.79	65.63	9		17.82	56.25	9		17.56	64.5	10
sp|Q06494|PLR1_YEAST	17.75	69.57	10		24.06	64.64	16		23.78	67.5	18
sp|P47068|BBC1_YEAST	17.74	25.32	10		18.19	31.81	9		16.82	27.7	11
sp|P10964|RPA1_YEAST	17.73	28.06	11		38.2	33.59	27		40.47	42.1	28
sp|P18562|UPP_YEAST	17.66	50.93	11		20	80.56	15		14.47	56	9
sp|P28834|IDH1_YEAST	17.65	53.89	16		28	66.94	19		25.53	58.3	18
sp|P32366|VA0D_YEAST	17.65	59.71	13		21.33	62.03	13		25.07	77.4	15
sp|P06101|CDC37_YEAST	17.61	54.15	11		29.09	43.48	19		20.81	42.5	14
sp|Q03195|RLI1_YEAST	17.47	35.69	12		28.4	49.67	19		25.7	44.7	17
sp|P39111|VATF_YEAST	17.43	93.22	15		8.56	81.36	10		13.67	80.5	9
sp|P07281|RS19B_YEAST	17.34	59.72	14		17.15	71.53	18		14.13	68.1	18
sp|P38737|ECM29_YEAST	17.24	29.39	10		11.7	19.97	9		15.95	20.1	9
sp|Q12480|ETFA_YEAST	17.24	62.79	13		18.04	68.6	11		23.78	75.9	15
sp|P48836|VATG_YEAST	17.23	60.53	12		15.94	55.26	9		19.84	56.1	11
sp|P38879|NACA_YEAST	17.2	60.34	20		21.04	76.44	25		18.15	70.1	20
sp|P12385|ERF1_YEAST	17.13	50.11	10		24.27	44.85	13		31.66	57.2	17
sp|P35844|KES1_YEAST	17.09	58.53	12		27.81	53	16		24.7	56.5	14
sp|P20459|IF2A_YEAST	17.05	50.99	10		27.67	67.76	19		23.14	71.7	14
sp|P46680|AIP1_YEAST	16.94	43.09	10		23.74	53.5	15		26.65	52.9	19
sp|Q08412|CUE5_YEAST	16.92	56.2	11		17.62	63.02	9		18.73	45.3	11
sp|Q12449|AHA1_YEAST	16.88	54.29	13		20.97	51.43	15		25.51	49.7	16
sp|P32598|PP12_YEAST	16.82	60.26	11		23.67	75.32	15		25.22	68	17
sp|P33297|PRS6A_YEAST	16.78	35.25	10		30.16	60.14	16		23.71	65.2	13
sp|P50861|RIB4_YEAST	16.77	88.17	29		19.69	87.57	20		19.64	80.5	18
sp|P00358|G3P2_YEAST	16.69	93.98	378		20.59	91.27	517		25.56	93.4	439
sp|P39517|DHH1_YEAST	16.62	33.79	9		9.66	38.54	9		16.27	29.6	10
sp|P27476|NSR1_YEAST	16.49	55.07	11		32.29	64.98	22		19.74	59.9	15
sp|P53731|ARPC2_YEAST	16.49	38.01	10		13.84	45.61	8		30	58.2	18
sp|P40106|GPP2_YEAST	16.45	82.4	34		18.16	82.8	35		16.54	80.8	32
sp|Q01855|RS15_YEAST	16.45	73.94	30		17.82	65.49	34		14.65	65.5	36
sp|Q03280|TOM1_YEAST	16.42	20.07	11		26.82	28.27	15		17.78	25.4	13
sp|P39078|TCPD_YEAST	16.38	52.46	9		21.97	59.09	15		23.6	52.1	16
sp|P27616|PUR7_YEAST	16.36	53.92	8		25.1	74.18	14		20.34	73.2	12
sp|P40302|PSA6_YEAST	16.27	67.09	11		20.64	82.91	14		18.1	68.8	11
sp|P0CX32|RS24B_YEAST	16.26	79.26	13		14.86	48.89	14		16.05	53.3	12
sp|Q04409|EMI2_YEAST	16.23	39.8	10		24.7	55.6	16		17.54	41.2	16
sp|Q06440|CORO_YEAST	16.19	34.25	11		9.59	28.11	5		16.3	31.5	9
sp|P14922|CYC8_YEAST	16.17	27.64	12		26	38.61	16		23.55	42.4	16
sp|P15496|IDI1_YEAST	16.17	76.39	20		22.45	87.85	20		18.72	79.9	18
sp|P36046|MIA40_YEAST	16.13	55.33	11		14.96	46.15	9		8.92	63.8	9
sp|P49017|COQ5_YEAST	16.1	59.93	10		20.13	61.56	14		15.94	69.7	11
sp|Q12265|KPR5_YEAST	16.08	44.56	9		22.5	63.91	12		23.32	54.4	14
sp|P39966|PP2C2_YEAST	16.06	33.62	10		22.79	38.15	12		21.7	49.8	14
sp|P05373|HEM2_YEAST	16.06	52.34	10		26.28	59.36	15		22.73	60.5	15
sp|P05317|RLA0_YEAST	16.05	39.1	18		18.37	42.31	24		16.06	30.5	23
sp|P21734|UBC1_YEAST	16.04	75.35	11		16.03	75.81	12		17.86	77.2	13
sp|P16387|ODPA_YEAST	16.04	48.57	8		24.42	66.43	15		20.84	53.1	16
sp|P23292|KC12_YEAST	16.04	30.95	11		8.01	30.95	6		13.74	46.7	7
sp|P46969|RPE_YEAST	16.03	81.93	12		18	83.19	12		17.51	83.6	14
sp|P07213|TOM70_YEAST	16.03	32.74	9		33.83	52.03	21		25.3	53.8	20
sp|Q04067|EIF3G_YEAST	16.02	46.35	11		14.04	55.84	11		16	39.4	11
sp|P36018|YPT52_YEAST	16.02	55.13	9		19.2	60.26	12		11.43	63.7	9
sp|P25349|YCP4_YEAST	16.02	65.99	12		14.13	62.75	8		14.17	56.3	12
sp|P0CX40|RS8B_YEAST	16.01	65	21		19.29	52.5	30		20.53	56	34
sp|P53909|ADE_YEAST	16.01	49.28	8		16.5	48.7	10		17.9	47.3	10
sp|P19146|ARF2_YEAST	16.01	70.72	12		6	86.19	15		16.01	72.4	14
sp|P25605|ILV6_YEAST	16	74.11	12		7.15	33.98	4		8.93	46.3	6
sp|P07560|SEC4_YEAST	16	47.91	8		14.02	65.58	9		18.01	61.4	9
sp|Q99312|ISN1_YEAST	16	53.33	8		14.48	44	10		13.4	43.6	10
sp|P39968|VAC8_YEAST	16	33.56	8		16.82	36.16	10		19.06	47.1	12
sp|P38616|YGP1_YEAST	16	39.27	12		24.98	42.94	24		14.76	50.6	15
sp|P36010|NDK_YEAST	16	69.28	9		18	66.67	9		22.05	76.5	11
sp|P32485|HOG1_YEAST	15.97	33.56	8		23.91	43.91	13		20.79	52.4	14
sp|P25343|RV161_YEAST	15.95	71.7	10		21.47	66.04	15		16.09	63	10
sp|P32588|PUB1_YEAST	15.92	39.51	12		22.58	49.67	14		15.27	42.6	14
sp|Q04062|RPN9_YEAST	15.88	42.75	8		22.84	55.22	15		19.45	47.3	11
sp|P38986|ASPG1_YEAST	15.86	49.34	9		13.24	34.12	10		10.89	30.2	8
sp|P31787|ACBP_YEAST	15.8	93.1	14		21.35	91.95	26		17.4	90.8	20
sp|P25037|UBP1_YEAST	15.75	31.52	8		10.01	29.91	5		11.17	24.6	8
sp|P38628|AGM1_YEAST	15.74	54.22	8		21.39	38.6	14		16.58	50.5	8
sp|P40037|HMF1_YEAST	15.7	97.67	12		14.27	92.25	13		16	89.9	16
sp|P40363|SFGH_YEAST	15.62	54.85	10		11.03	65.22	11		16.09	49.5	10
sp|P50094|IMDH4_YEAST	15.54	55.53	22		15.12	65.46	24		16.02	63	28
sp|P40414|TPM2_YEAST	15.49	57.14	9		21.5	60.87	17		14.36	65.2	10
sp|P38077|ATPG_YEAST	15.47	61.41	11		18.01	62.7	10		18.01	58.5	10
sp|P40075|SCS2_YEAST	15.42	48.77	13		21.65	52.87	16		14.51	47.1	14
sp|P15303|SEC23_YEAST	15.4	26.43	10		29.5	47.92	18		32.14	46.1	17
sp|P40582|GST1_YEAST	15.4	50.43	11		18.53	55.56	14		19.52	46.6	13
sp|P33299|PRS7_YEAST	15.37	61.03	11		18.67	53.96	11		21.66	53.3	14
sp|P41818|GLC8_YEAST	15.36	56.33	11		15.9	54.59	12		16.91	59	12
sp|P0CX50|RL18B_YEAST	15.32	73.66	11		9.3	40.86	11		12.95	41.9	13
sp|P05756|RS13_YEAST	15.3	70.2	11		19.04	70.2	18		18.57	60.9	16
sp|Q06705|CSR1_YEAST	15.27	56.86	8		14.19	52.45	8		20.3	49.3	12
sp|P30657|PSB7_YEAST	15.25	63.91	9		17.05	69.17	10		14.98	64.3	10
sp|P38694|MSC7_YEAST	15.2	43.48	9		15.23	41.3	9		19.03	38.2	11
sp|P32558|SPT16_YEAST	15.18	28.5	10		31.2	37.68	18		33.6	40.2	21
sp|P15565|TRM1_YEAST	15.13	39.47	8		17.77	45.61	10		23.31	42.3	13
sp|P22147|XRN1_YEAST	15.07	34.82	10		23.02	37.17	17		22.44	45.2	15
sp|P53235|EIF2A_YEAST	15.04	34.74	10		20.27	36.29	13		21.16	38.5	11
sp|P13517|CAPZB_YEAST	15.03	44.6	11		24.47	62.37	16		19.78	69	12
sp|P49954|NIT3_YEAST	14.95	66.32	8		10.79	49.83	7		12.06	52.9	7
sp|Q06385|VPS74_YEAST	14.88	55.36	10		21.52	62.9	12		20.02	72.5	12
sp|P32891|DLD1_YEAST	14.86	37.48	10		25.5	49.91	14		17.81	43.4	11
sp|P10080|SSBP1_YEAST	14.76	68.37	9		22.17	67.69	16		20.2	65.7	13
sp|P12904|AAKG_YEAST	14.76	45.34	12		15.06	45.03	9		19.79	59.9	16
sp|P36136|SHB17_YEAST	14.76	60.15	12		15.12	70.85	12		19.62	59.8	15
sp|Q86ZR7|YKD3A_YEAST	14.54	70.76	9		18.06	81.78	13		18.71	79.2	12
sp|P35197|GCS1_YEAST	14.49	62.22	10		20.66	71.59	16		22.85	72.4	20
sp|Q06489|MTNA_YEAST	14.49	41.85	7		19.13	58.88	12		20.51	49.6	11
sp|P50107|LGUL_YEAST	14.39	46.01	8		19.06	52.45	10		16.19	52.2	8
sp|P08518|RPB2_YEAST	14.37	26.06	11		23.4	26.63	19		23.29	25.7	15
sp|P32469|DPH5_YEAST	14.36	49	9		16	59.33	16		19.28	59.7	12
sp|P32486|KRE6_YEAST	14.34	20.56	7		18.25	28.33	11		18.11	25.8	11
sp|P06787|CALM_YEAST	14.31	84.35	15		14	84.35	20		14.36	89.8	16
sp|P40303|PSA4_YEAST	14.3	76.77	10		18.02	64.17	11		16.01	55.5	10
sp|P32499|NUP2_YEAST	14.27	45.14	12		17.55	42.22	13		17.27	46	12
sp|P32939|YPT7_YEAST	14.25	58.65	7		18.77	81.25	10		18.09	74	11
sp|P07277|KIME_YEAST	14.18	33.41	11		19.64	60.95	12		19.25	38.6	11
sp|P32895|KPR1_YEAST	14.16	40.28	9		22.51	45.9	13		16.16	48.5	10
sp|P20081|FKBP_YEAST	14.15	77.19	20		18.03	83.33	26		16.34	84.2	20
sp|Q03862|ARX1_YEAST	14.14	25.97	7		24.74	50.25	12		17.55	42.8	11
sp|Q05775|EIF3J_YEAST	14.13	52.83	8		20.45	55.85	13		19.54	47.9	11
sp|P53319|6PGD2_YEAST	14.12	68.29	32		19.53	60.16	44		14.92	59.8	36
sp|P16547|OM45_YEAST	14.09	50.64	8		22.13	60.56	14		14.99	64.4	9
sp|P38886|RPN10_YEAST	14.09	40.67	9		16	41.04	8		18.09	49.6	11
sp|P02829|HSP82_YEAST	14.07	65.16	116		17.99	65.02	165		18.74	62.2	140
sp|Q12019|MDN1_YEAST	14.06	15.58	8		21.18	22.02	15		37.52	22.7	22
sp|P17423|KHSE_YEAST	14.06	56.3	11		19.95	67.79	12		17.42	54.3	12
sp|P32472|FKBP2_YEAST	14.06	76.3	11		15.68	76.3	9		14.99	80.7	12
sp|P46683|YAR1_YEAST	14.04	71.5	9		15	87.5	9		14.8	80	8
sp|P50086|PSD10_YEAST	14.04	49.56	8		12.84	48.68	8		15.84	62.7	10
sp|Q02642|NACB1_YEAST	14.03	79.62	35		14.11	73.89	32		12.98	88.5	31
sp|P32628|RAD23_YEAST	14.02	37.69	8		16	37.94	8		17.39	49.3	10
sp|P25719|CYPC_YEAST	14.01	74.73	20		14.01	67.03	18		7.91	48.4	15
sp|Q03048|COFI_YEAST	14	88.11	14		17.1	73.43	29		13.66	86	27
sp|P35732|DEF1_YEAST	14	24.53	21		15.88	23.98	19		12.26	25.2	22
sp|P05748|RL15A_YEAST	14	40.2	19		16.06	51.96	21		14.46	37.8	22
sp|P40471|AYR1_YEAST	14	42.76	8		16.89	56.57	11		16.89	46.8	10
sp|P36105|RL14A_YEAST	14	45.65	9		3.04	60.87	10		13.73	47.8	13
sp|P53250|TWF1_YEAST	13.97	48.19	10		13.45	46.08	8		12.23	44	8
sp|P21242|PSA7_YEAST	13.96	47.22	7		15.74	51.74	9		16	41.7	9
sp|P47117|ARP3_YEAST	13.96	65.03	11		20.55	67.04	14		20.18	54.8	12
sp|P38260|FES1_YEAST	13.95	36.9	10		19.04	62.07	12		17	51.7	11
sp|P36015|YKT6_YEAST	13.94	62	11		18.56	69.5	15		18.9	85.5	13
sp|Q08641|AB140_YEAST	13.93	37.58	10		20.22	38.54	14		9.78	24.4	7
sp|P38197|YBD6_YEAST	13.93	61.48	8		19.78	68.48	10		14.04	59.9	7
sp|Q3E7Y3|RS22B_YEAST	13.82	79.23	21		13.52	71.54	24		12.52	61.5	23
sp|Q12434|GDIR_YEAST	13.8	68.81	7		14.43	66.83	8		10	55.5	5
sp|P0CX24|RL20B_YEAST	13.79	54.65	15		15.09	61.63	14		15.62	57.6	22
sp|Q05515|SVF1_YEAST	13.79	43.04	8		16.57	45.95	10		15.89	50.5	12
sp|P09457|ATPO_YEAST	13.66	58.96	8		18.44	65.09	12		16.47	57.1	9
sp|Q05979|KYNU_YEAST	13.62	36.42	9		15.2	39.29	10		17.96	37.1	13
sp|P24521|ERG8_YEAST	13.6	56.1	7		20.78	64.97	12		14.35	45	8
sp|P36047|SDS22_YEAST	13.47	53.85	10		19.95	63.61	13		18.91	61	14
sp|P38623|RCK2_YEAST	13.44	32.13	8		10.16	24.75	7		10.02	29.8	5
sp|P07260|IF4E_YEAST	13.38	56.81	18		18.29	83.1	18		20.38	82.6	21
sp|Q08647|PUS7_YEAST	13.38	40.68	8		15.25	40.38	12		14.06	37	7
sp|P47160|ENT3_YEAST	13.33	38.48	8		13.15	30.15	10		16.02	29.2	9
sp|P29704|FDFT_YEAST	13.33	36.71	10		24.08	54.28	13		22.94	41.4	14
sp|P33775|PMT1_YEAST	13.32	25.46	8		10.92	18.12	7		19.25	26.4	11
sp|P05318|RLA1_YEAST	13.2	43.4	22		23.08	43.4	26		21.42	48.1	31
sp|Q12123|DCS2_YEAST	13.18	53.54	10		20.28	60.91	12		12.09	47.9	11
sp|P32566|SMI1_YEAST	13.17	41.19	8		8.02	32.28	5		8.01	18.8	6
sp|Q08723|RPN8_YEAST	13.17	44.67	11		19.45	58.58	13		18.28	70.1	11
sp|P40053|AIM9_YEAST	13.13	42.58	8		17.21	48.96	9		14.47	47.1	11
sp|P37898|AAP1_YEAST	13.11	31.43	12		18.55	31.66	16		17.33	33.3	14
sp|P89886|TMA20_YEAST	13.08	76.24	8		16.03	72.38	8		15.85	75.7	8
sp|Q12377|RPN6_YEAST	13.06	39.4	7		18.75	49.54	12		17.03	48.6	13
sp|P40517|YRB2_YEAST	13	41.9	7		12.82	54.13	8		6.23	48.9	4
sp|P32496|RPN12_YEAST	12.99	47.45	9		18.72	59.12	12		16.01	59.9	9
sp|P32474|EUG1_YEAST	12.9	42.94	9		14.44	36.36	8		15.73	38.5	9
sp|P33401|PGM1_YEAST	12.87	37.37	13		14.24	59.12	14		14.02	45.3	11
sp|P43597|YFI6_YEAST	12.87	25.06	11		13.67	33.58	7		11.5	28.5	7
sp|P17891|CLC1_YEAST	12.86	40.77	7		9.17	43.35	8		12.81	47.6	9
sp|P38235|YBQ3_YEAST	12.84	45.53	7		19.08	62.01	11		8.91	46.1	7
sp|Q07716|AIM6_YEAST	12.74	44.62	8		12.21	47.18	8		11.62	42.6	7
sp|P38426|TPS3_YEAST	12.56	33.68	9		26.04	33.87	15		23.08	37.2	17
sp|P23724|PSB6_YEAST	12.56	48.55	9		14.03	58.92	8		16	69.7	9
sp|P33399|LHP1_YEAST	12.52	60.73	10		20.59	62.18	14		20.68	71.3	12
sp|P39926|SSO2_YEAST	12.46	49.15	9		17.26	46.78	11		14.41	42.7	8
sp|P35176|CYPD_YEAST	12.45	70.22	16		13.94	64.44	22		15.13	72	19
sp|P0CT04|IPB2_YEAST	12.44	74.67	15		7.88	73.33	6		7.27	78.7	5
sp|P23638|PSA3_YEAST	12.43	51.94	8		22	68.6	12		17.24	71.3	11
sp|P51601|GCH1_YEAST	12.39	66.26	7		12.56	71.19	9		12.13	59.3	6
sp|P27692|SPT5_YEAST	12.37	30.2	8		12.6	28.6	9		17.14	26.3	10
sp|P46681|DLD2_YEAST	12.28	53.4	9		12.91	37.55	9		13.38	33	8
sp|P36139|PET10_YEAST	12.24	52.3	7		18.88	60.07	13		17.87	48.1	10
sp|P49435|APT1_YEAST	12.22	58.29	10		16.81	62.57	14		12.48	49.7	9
sp|P01123|YPT1_YEAST	12.17	66.5	13		19.58	72.33	15		12	57.8	12
sp|P28273|OPLA_YEAST	12.16	31.26	7		7.62	16.87	5		4.72	18.5	4
sp|Q05022|RRP5_YEAST	12.15	23.37	6		17.24	26.84	10		21.78	21.5	14
sp|Q03940|RUVB1_YEAST	12.14	36.93	6		20.05	46.65	10		24.4	50.8	14
sp|Q01939|PRS8_YEAST	12.1	47.9	9		17.75	59.26	11		18.16	47.2	11
sp|P32319|VPS10_YEAST	12.1	17.1	8		22.1	28.37	12		15.34	28.7	11
sp|P38523|GRPE_YEAST	12.1	50.44	11		14.4	70.18	11		12.23	54	9
sp|Q08686|THTR_YEAST	12.1	36.84	9		13.75	55.26	9		8.12	51.3	5
sp|P54860|UFD2_YEAST	12.08	22.37	8		25.07	41.21	14		18.22	32	11
sp|P38817|GGA2_YEAST	12.08	36.41	9		20.89	41.03	12		18.12	34.2	10
sp|P32602|SEC17_YEAST	12.06	50	8		14.22	46.92	10		16.9	53.4	13
sp|Q08971|YP225_YEAST	12.04	57.53	7		14.33	80.82	8		16.01	75.3	11
sp|P19524|MYO2_YEAST	12.04	26.49	7		14.31	33.86	9		15.16	21	8
sp|P38988|GGC1_YEAST	12.04	46	8		16.03	61.33	9		17.25	66	10
sp|P38145|RISA_YEAST	12.04	50.42	7		17.56	52.1	12		12.69	53.8	9
sp|Q07451|YET3_YEAST	12.03	24.63	7		10.71	33.99	7		12.04	24.6	8
sp|P53334|SCW4_YEAST	12.03	31.61	8		14.9	40.67	10		14	33.4	7
sp|P51996|YPT32_YEAST	12.02	54.95	8		4	54.95	8		1.59	47.8	8
sp|P22133|MDHC_YEAST	12.02	46.42	6		10.03	29.44	5		14	43.5	7
sp|P40509|COPE_YEAST	12.02	45.61	6		16	54.05	8		16	57.4	9
sp|P22803|TRX2_YEAST	12.01	87.5	17		16.02	81.73	27		12.25	93.3	28
sp|P05453|ERF3_YEAST	12.01	31.09	6		11.27	26.57	7		14.44	40	9
sp|P14907|NSP1_YEAST	12.01	29.77	6		12.98	30.5	10		18.31	45.4	12
sp|P51534|SHE4_YEAST	12.01	26.74	7		10.17	25.86	5		9.89	29.9	6
sp|P11353|HEM6_YEAST	12	34.76	11		11.86	48.78	6		11.7	39.3	6
sp|P00447|SODM_YEAST	12	68.24	7		14.22	86.27	7		10.23	85.4	7
sp|P05745|RL36A_YEAST	12	68	11		11.18	58	17		12	60	16
sp|Q02784|GLRX5_YEAST	12	74	6		14	76.67	8		14.39	80	9
sp|Q00245|RHO3_YEAST	12	46.32	6		15.92	61.9	8		12.26	42.9	9
sp|P32911|SUI1_YEAST	12	82.41	6		14.12	80.56	12		10.31	71.3	11
sp|P25369|LSB5_YEAST	12	42.66	8		16	48.87	10		14	40.7	7
sp|P25373|GLRX1_YEAST	12	71.82	10		13.66	83.64	15		11.92	70	13
sp|P05375|PEM2_YEAST	12	54.37	7		12	43.2	6		12	59.2	9
sp|P48510|DSK2_YEAST	11.97	42.63	8		11.89	47.99	10		8.25	26.5	7
sp|P32386|YBT1_YEAST	11.96	27.81	9		19.92	21.55	12		10.05	23.5	8
sp|Q12306|SMT3_YEAST	11.92	78.22	9		8.01	78.22	8		6.05	69.3	7
sp|P32316|ACH1_YEAST	11.89	37.45	7		16.27	46.01	8		20.91	55.1	13
sp|P32476|ERG1_YEAST	11.87	48.19	7		11.77	44.15	7		12.23	40.5	7
sp|P40159|YNU8_YEAST	11.82	61.31	23		21.33	75.88	24		17.31	71.9	25
sp|P02992|EFTU_YEAST	11.78	38.22	6		14	29.75	7		16.35	45.3	11
sp|P40581|GPX3_YEAST	11.74	58.9	6		14.22	68.71	9		14	66.9	9
sp|Q05584|GLO2_YEAST	11.74	56.93	8		12.52	52.92	10		13.93	49.3	7
sp|P0CX42|RL23B_YEAST	11.72	81.02	11		16.01	74.45	16		20.1	83.9	17
sp|P07703|RPAC1_YEAST	11.66	34.93	6		17.44	70.15	11		13.56	57.9	8
sp|P05319|RLA2_YEAST	11.59	54.72	11		12.04	54.72	19		10.48	52.8	18
sp|P24031|PPA3_YEAST	11.56	27.41	6		15.53	35.97	10		12	23.1	7
sp|P14743|NMT_YEAST	11.56	30.11	7		22.89	58.46	15		23.38	58.2	12
sp|P48164|RS7B_YEAST	11.38	60.53	12		14.46	60.53	15		12.03	69.5	13
sp|P28707|SBA1_YEAST	11.37	46.3	6		10	28.24	7		7.1	35.7	6
sp|P38248|ECM33_YEAST	11.36	15.62	9		12.98	15.62	17		11.47	18.2	16
sp|P32898|CYM1_YEAST	11.35	29.52	6		4.03	18.6	3		9.39	27.2	5
sp|P47123|MOG1_YEAST	11.32	52.75	6		18.08	76.15	11		16.59	79.8	10
sp|P34221|PP2C3_YEAST	11.31	35.68	9		13.99	36.32	10		16	35.5	10
sp|P52553|PFD6_YEAST	11.31	75.44	7		14.02	78.07	8		11.12	70.2	6
sp|P14906|SEC63_YEAST	11.26	16.59	6		6.04	21.72	4		13.85	31.4	8
sp|P09064|IF2B_YEAST	11.22	64.21	8		18.31	63.86	12		15.26	55.4	10
sp|P53549|PRS10_YEAST	11.21	35.93	7		14.76	51.03	10		24.57	54.2	14
sp|P17695|GLRX2_YEAST	11.19	51.05	8		12	67.83	12		8.28	50.4	12
sp|Q12314|YO021_YEAST	11.07	46.01	7		16.19	75.59	11		16.46	52.1	8
sp|Q06625|GDE_YEAST	11.03	23.18	8		26.24	30.08	15		24.25	29.3	16
sp|Q12178|FCY1_YEAST	11.02	65.82	8		9.01	74.05	7		10.25	61.4	9
sp|Q12159|YRA1_YEAST	10.98	72.12	8		14.7	74.78	10		12.35	58.9	7
sp|P0CX30|RS23B_YEAST	10.95	62.07	11		12.02	48.28	12		8	35.2	10
sp|P38804|SDO1L_YEAST	10.9	66.67	9		12.02	65.77	11		12.4	51.4	10
sp|P38069|MNN2_YEAST	10.82	37.35	9		27.18	59.13	19		25.86	48.6	15
sp|P52893|ALAM_YEAST	10.8	41.55	6		27.09	52.7	16		25.15	48.5	13
sp|P32178|CHMU_YEAST	10.62	46.48	6		8.98	46.88	5		11.66	68	8
sp|P53834|HCH1_YEAST	10.59	74.51	6		14.66	71.24	10		16.96	83	9
sp|P53860|PDR16_YEAST	10.57	54.7	6		12.01	41.03	7		17.73	55	9
sp|P39004|HXT7_YEAST	10.52	20.18	7		8.09	26.32	5		13.04	30.4	7
sp|Q99383|HRP1_YEAST	10.52	44.94	6		16.02	45.51	10		13.72	31.1	7
sp|P40580|BZRD_YEAST	10.52	70.34	6		9.54	46.39	5		7.33	41.4	6
sp|P15700|KCY_YEAST	10.48	59.31	7		16.02	60.29	11		13.01	59.3	9
sp|P19262|ODO2_YEAST	10.46	37.8	6		10.46	34.34	6		14.02	55.7	8
sp|P40518|ARPC5_YEAST	10.46	72.08	6		14	72.73	9		10.14	55.8	6
sp|P23639|PSA2_YEAST	10.37	53.6	8		10.23	44.4	9		13.69	63.2	11
sp|Q04371|YMR7_YEAST	10.35	61.7	10		26.32	54.26	16		21.48	58.7	14
sp|P40459|PANC_YEAST	10.33	46.28	7		12.02	46.28	6		10.02	49.8	5
sp|P33322|CBF5_YEAST	10.22	40.17	5		15.5	47.83	10		17.56	44.5	11
sp|P0C2H9|RL31B_YEAST	10.22	39.82	9		10.18	61.06	8		12.21	57.5	11
sp|P43569|CAF16_YEAST	10.2	38.41	5		9.73	44.98	6		12	35.6	7
sp|Q3E754|RS21B_YEAST	10.2	60.92	13		13.24	79.31	18		10.17	60.9	22
sp|O14467|MBF1_YEAST	10.19	58.94	9		10.63	59.6	12		6.24	59.6	8
sp|P27810|KTR1_YEAST	10.19	35.37	5		10.03	20.36	5		14.4	37.4	7
sp|P40506|PPCS_YEAST	10.17	49.32	7		8.04	38.9	4		8.72	43.6	7
sp|P38199|HEK2_YEAST	10.13	35.7	6		10.4	32.81	7		10.23	33.3	5
sp|Q04493|PFD5_YEAST	10.13	52.76	7		7.58	40.49	6		10.5	52.2	7
sp|P36775|LONM_YEAST	10.12	38.22	7		18.38	38.83	11		18.69	35.2	11
sp|P47044|YJF5_YEAST	10.1	57.96	6		14.02	64.9	9		12.17	53.1	9
sp|P39714|BDH1_YEAST	10.08	46.86	6		11.78	41.36	8		11.51	38.5	6
sp|P07278|KAPR_YEAST	10.06	38.94	5		6.32	31.25	5		10.4	30.1	6
sp|P54861|DNM1_YEAST	10.05	19.55	5		16.29	32.23	8		15.37	31.3	10
sp|P22023|KRE5_YEAST	10.05	22.78	7		14.1	32.23	7		10.6	18.5	7
sp|P20485|KICH_YEAST	10.05	28.35	6		12.61	30.76	7		14.54	40.4	9
sp|P02400|RLA4_YEAST	10.05	100	19		16.62	85.45	24		13.51	88.2	26
sp|P07246|ADH3_YEAST	10.04	44.8	26		13.96	58.67	17		12.39	54.1	16
sp|P34160|NCBP1_YEAST	10.04	15.8	5		19.06	38.68	12		21.34	32.3	11
sp|P33327|DHE2_YEAST	10.04	24.27	5		11.17	22.99	6		13.01	31.1	10
sp|P41911|GPD2_YEAST	10.03	42.5	9		20.81	58.41	12		14.06	52.7	9
sp|Q12166|LEU9_YEAST	10.02	57.95	20		14.02	52.32	25		8.01	64.4	23
sp|P32381|ARP2_YEAST	10.02	30.18	6		8.92	40.41	6		19.85	50.1	11
sp|P25555|GBP2_YEAST	10.02	36.07	5		8.19	43.09	6		8.37	27.2	5
sp|Q03262|PGM3_YEAST	10.02	26.69	6		18.16	34.89	12		15.24	40.4	9
sp|P42938|TDA10_YEAST	10.02	41.72	5		20.02	58.28	14		15.14	47.6	8
sp|P09440|C1TM_YEAST	10.01	25.74	8		8.38	31.38	7		11.13	29.6	10
sp|Q05029|BCH1_YEAST	10.01	21.41	6		21.66	41.02	12		10.5	33.7	7
sp|P10614|CP51_YEAST	10.01	31.13	5		12.39	36.6	7		16.56	42.6	9
sp|Q12754|RRP12_YEAST	10.01	13.03	6		14.05	20.44	9		17.69	21.4	12
sp|Q02892|NOG1_YEAST	10.01	31.99	5		9.94	29.68	6		7.68	35.6	4
sp|Q12189|RPIA_YEAST	10.01	59.69	6		10.29	50.78	6		14.17	47.3	7
sp|Q12464|RUVB2_YEAST	10.01	33.55	5		10.06	45.86	6		11.96	44.4	7
sp|P38821|DNPEP_YEAST	10.01	36.94	5		12.03	35.51	6		6.04	31.8	4
sp|P25296|CANB_YEAST	10.01	81.71	7		11.26	76.57	9		10.42	84	8
sp|P47008|SFH5_YEAST	10.01	32.65	5		11.92	61.9	9		9.11	48.6	6
sp|P42940|ETFB_YEAST	10.01	33.33	6		18.09	48.28	10		9.87	56.3	8
sp|P04456|RL25_YEAST	10.01	45.77	13		14.06	53.52	19		13.28	52.1	19
sp|Q03835|GLRX3_YEAST	10	30.18	5		12.41	35.44	8		12.5	33.3	10
sp|P24000|RL24B_YEAST	10	34.84	5		12.02	41.94	8		12.01	39.4	8
sp|Q12513|TMA17_YEAST	10	44.67	8		10.04	60.67	10		10	50	7
sp|P38755|OSH7_YEAST	10	25.63	6		14.12	36.38	8		15.58	42.3	9
sp|P32790|SLA1_YEAST	10	20.5	6		4.03	11.01	2		10.73	27.5	8
sp|P39721|AIM2_YEAST	10	73.98	10		6.55	29.67	6		8.21	39.8	5
sp|P39990|SNU13_YEAST	10	80.95	12		12	81.75	14		12	75.4	11
sp|P47089|DENR_YEAST	10	62.12	7		6.78	49.49	5		4.01	29.3	4
sp|P38264|PHO88_YEAST	10	63.83	9		8.02	50	8		9.83	62.8	11
sp|Q12746|PGA3_YEAST	10	37.18	5		4.99	28.21	4		5.4	36.9	5
sp|Q08193|GAS5_YEAST	10	25.83	6		14	26.03	13		10.56	26.5	8
sp|P43582|WWM1_YEAST	10	45.02	11		11.3	53.08	11		11.68	38.9	9
sp|P38288|TOS1_YEAST	10	29.89	6		10.53	28.79	7		8.87	23.1	6
sp|Q12125|GET4_YEAST	10	27.24	6		9.19	35.58	5		11.37	36.2	7
sp|P19454|CSK22_YEAST	9.96	41.59	5		12.04	34.51	6		10.04	38.4	6
sp|Q12354|APTH1_YEAST	9.96	57.71	5		10.08	78.41	5		8	43.2	4
sp|P38353|SSH1_YEAST	9.83	30.41	7		8.53	28.57	5		8.52	23.3	5
sp|P33202|UFD4_YEAST	9.82	20.5	6		14.93	18.14	8		14.14	17.5	8
sp|P25574|EMC1_YEAST	9.78	17.24	5		6.58	25.13	5		10.86	28.8	7
sp|P38116|ARL1_YEAST	9.75	65.03	6		17.1	73.22	12		14.44	50.3	8
sp|P38910|CH10_YEAST	9.74	71.7	8		12	61.32	10		11.9	68.9	11
sp|Q04344|HNT1_YEAST	9.72	58.86	6		9.36	48.1	6		8.01	53.2	7
sp|P21576|VPS1_YEAST	9.7	29.69	7		12.04	25.28	8		19.98	40.2	12
sp|P22141|PSB4_YEAST	9.69	49.49	7		6.99	42.93	5		10.05	53	7
sp|P38113|ADH5_YEAST	9.6	40.17	17		6.42	44.16	10		7.89	39.3	9
sp|Q06146|YL257_YEAST	9.58	51.4	7		14.16	58.26	9		12.17	56.7	8
sp|P00427|COX6_YEAST	9.49	55.41	6		14.51	77.7	8		7.8	57.4	4
sp|P07172|HIS8_YEAST	9.46	32.47	5		19.91	49.35	13		18	42.1	9
sp|P32771|FADH_YEAST	9.43	26.94	5		14.88	41.97	8		8.28	31.1	4
sp|P30656|PSB5_YEAST	9.34	32.06	5		14	51.57	9		16	50.2	10
sp|Q01476|UBP2_YEAST	9.27	42.53	7		15	26.49	9		11.74	21.2	6
sp|P0CX26|RL43B_YEAST	9.27	43.48	7		10.52	43.48	8		6.77	56.5	7
sp|P32445|RIM1_YEAST	9.21	68.89	9		10.34	63.7	9		6.42	57	6
sp|P14120|RL30_YEAST	9.18	70.48	11		11.06	68.57	15		8.97	57.1	15
sp|P21304|PWP1_YEAST	9.17	42.88	5		13.94	41.32	8		18.02	34.2	9
sp|Q08822|ETFD_YEAST	9.16	44.06	6		8.2	29.48	5		9.83	27.1	5
sp|P05739|RL6B_YEAST	9.15	56.82	15		21.4	82.95	18		6	51.1	13
sp|P43621|COPD_YEAST	9.15	28.57	9		9.89	29.85	8		9.86	41.8	9
sp|Q03640|TCB3_YEAST	9.1	27.96	6		9.14	25.44	6		12.64	29.6	9
sp|P54000|SUB1_YEAST	9.1	50.68	5		4.06	25.34	2		4.43	27.4	3
sp|P32466|HXT3_YEAST	9	34.74	6		12	19.22	7		10.03	23.6	6
sp|P06780|RHO1_YEAST	8.92	50.24	5		14	57.42	8		14.22	71.3	10
sp|P32340|NDI1_YEAST	8.87	37.43	5		8.02	24.95	5		20.02	45	11
sp|Q02046|MTD1_YEAST	8.84	42.19	5		2.26	35.31	2		4.36	36.6	3
sp|P36037|DOA1_YEAST	8.81	24.62	5		12.93	30.21	10		10.83	25	6
sp|P21264|PUR6_YEAST	8.78	32.05	6		13.54	38.53	8		18.25	38.4	9
sp|Q08220|GSHB_YEAST	8.78	28.31	7		18.55	56.21	12		22.63	50.1	15
sp|P42941|SERB_YEAST	8.77	39.16	7		14.1	45.63	8		12.68	47.3	7
sp|P48363|PFD3_YEAST	8.73	49.75	5		11.22	69.35	9		14	80.9	10
sp|P23644|TOM40_YEAST	8.63	39.53	6		12.21	34.63	9		18.33	48.1	12
sp|P23594|PP2A1_YEAST	8.63	37.4	6		17.68	62.33	10		3.16	51	8
sp|P52918|MSN5_YEAST	8.61	17.16	5		14.37	25.98	8		14.78	27	8
sp|P53145|LSG1_YEAST	8.59	27.66	5		4.61	27.5	3		8.03	30.5	4
sp|Q12486|YOR31_YEAST	8.57	46.33	5		13.47	51.83	7		10.98	58.3	6
sp|P28495|CAPZA_YEAST	8.56	56.34	7		12.38	55.22	9		18.15	57.8	12
sp|P40019|CHZ1_YEAST	8.55	75.82	6		8.01	67.97	4		8.06	60.8	5
sp|P04046|PUR1_YEAST	8.54	35.69	5		19.1	47.84	12		17.12	43.9	10
sp|P23291|KC11_YEAST	8.53	40.15	11		11.07	32.9	6		7.91	28.6	5
sp|P09950|HEM1_YEAST	8.52	32.85	6		9.93	37.04	9		16.04	37.4	8
sp|Q12305|RDL1_YEAST	8.51	89.93	11		16.36	68.35	13		18.59	89.9	14
sp|P38281|APD1_YEAST	8.46	55.06	5		13.87	66.77	8		13.6	51.6	7
sp|P39743|RV167_YEAST	8.45	30.71	6		15.41	41.08	11		19.62	35.5	12
sp|P47137|YJ66_YEAST	8.45	64.18	7		18.04	70.21	10		15.21	68.4	10
sp|P38081|YBQ6_YEAST	8.36	38.92	4		4.25	23.55	3		8.77	40.7	6
sp|P89105|CTR9_YEAST	8.32	33.24	4		7.46	24.42	6		12.04	27.3	7
sp|P32621|GDA1_YEAST	8.23	18.15	4		12.34	34.17	6		11.32	26.6	7
sp|P54837|TMEDA_YEAST	8.22	50.24	5		14.92	72.04	8		14	52.1	7
sp|P53265|YG2W_YEAST	8.21	30.5	4		16.1	51.75	8		11.02	45	6
sp|P38071|ETR1_YEAST	8.21	33.42	5		19.23	54.47	10		13.88	47.9	10
sp|P32356|TREA_YEAST	8.21	33.02	5		23.91	54.19	14		20.93	43.5	12
sp|P12695|ODP2_YEAST	8.2	32.37	5		18.07	30.5	11		14.56	29.3	8
sp|P38624|PSB1_YEAST	8.2	80.93	7		7.97	62.79	5		8.72	74	8
sp|Q06685|VIP1_YEAST	8.19	32.11	5		11.63	30.8	7		15.97	35.4	9
sp|O43137|YB085_YEAST	8.19	38.82	7		6	30.59	3		6.21	43.5	4
sp|P40563|AIM21_YEAST	8.18	31.37	6		12.03	30.78	7		9.8	32.7	6
sp|P15274|AMPD_YEAST	8.17	30	6		4.41	21.11	3		6.12	17.4	5
sp|Q12443|RTN2_YEAST	8.17	21.88	5		4.97	37.91	4		11.84	32.6	7
sp|P52489|KPYK2_YEAST	8.1	45.65	23		8.05	42.89	28		9.83	38.7	24
sp|P21269|CCA1_YEAST	8.1	33.52	6		8.99	37.55	5		6.46	34.1	4
sp|P11491|PPB_YEAST	8.07	29.51	5		4.02	25.09	3		10	21.7	5
sp|Q3E7X9|RS28A_YEAST	8.07	47.76	7		6	41.79	6		8	47.8	8
sp|P30605|ITR1_YEAST	8.05	28.6	4		13.58	23.46	7		11.75	20.2	6
sp|P40202|CCS1_YEAST	8.05	61.04	5		10	50.2	6		10	49	7
sp|P40462|TM108_YEAST	8.04	30.13	5		18.17	25.48	10		18.96	28	9
sp|P53152|MMS2_YEAST	8.04	67.88	6		8.11	48.18	4		9.68	47.5	5
sp|Q04491|SEC13_YEAST	8.04	36.03	5		15.2	41.08	9		11.06	46.8	7
sp|P38912|IF1A_YEAST	8.03	37.25	6		10.36	47.71	6		8.01	36.6	5
sp|P40016|RPN3_YEAST	8.03	37.28	4		14.45	36.9	10		17	47.8	12
sp|P15790|CSK21_YEAST	8.03	41.67	6		4.02	19.89	2		4	20.4	3
sp|Q01976|ADPP_YEAST	8.03	41.56	5		8.88	56.71	7		8.1	61.5	5
sp|P40481|HPM1_YEAST	8.03	27.32	4		2.01	15.12	1		6.01	32.9	3
sp|Q03655|GAS3_YEAST	8.03	16.98	5		12.51	42.56	9		12.02	27.5	7
sp|P47039|BNA3_YEAST	8.02	33.78	6		15.44	50.9	11		10.01	58.8	9
sp|P53261|PESC_YEAST	8.02	31.74	4		9.57	30.74	7		11.85	38	7
sp|Q07381|TSR1_YEAST	8.02	28.93	4		6.02	21.7	3		6.18	14.5	4
sp|P26785|RL16B_YEAST	8.01	40.91	12		14.6	53.03	13		16	28.8	9
sp|P07274|PROF_YEAST	8.01	90.48	15		10	83.33	21		12.01	80.2	19
sp|P20434|RPAB1_YEAST	8.01	58.14	4		5.27	49.3	4		6.68	56.3	5
sp|P32332|OAC1_YEAST	8.01	39.2	6		16.01	44.44	12		14.06	42.3	10
sp|P38765|YHI9_YEAST	8.01	40.14	6		14.2	58.84	9		9.23	45.2	8
sp|P39931|SS120_YEAST	8.01	29.91	4		15.09	47.01	8		6.33	27.4	4
sp|P40150|HSP76_YEAST	8	78.14	126		10	80.59	174		8.55	80.9	179
sp|P48570|HOSC_YEAST	8	78.5	30		8.08	73.13	34		12.05	78.7	42
sp|P33442|RS3A1_YEAST	8	77.25	32		6.9	82.75	37		6.04	67.5	42
sp|P36017|VPS21_YEAST	8	30.95	5		10	48.1	7		14	49.5	7
sp|P47165|XPT1_YEAST	8	54.07	6		9.8	49.76	6		14	55.5	9
sp|P38234|RFS1_YEAST	8	40.48	5		14.94	51.9	11		12.01	47.6	8
sp|P38758|TDA3_YEAST	8	27.92	5		13.32	29.25	8		10.01	27.5	5
sp|P07347|ARD1_YEAST	8	33.61	4		10	31.09	5		8.04	37.4	5
sp|P38286|MKAR_YEAST	8	30.55	4		6.26	39.19	5		10	40.6	6
sp|P40010|NUG1_YEAST	8	23.27	4		6	17.69	3		10.01	25	6
sp|P27466|KCC1_YEAST	8	17.49	4		8.01	24.66	5		6.76	29.2	4
sp|Q06624|RHC31_YEAST	8	48.41	4		7.9	34.01	4		8.01	26.2	4
sp|Q03629|YMH9_YEAST	8	52.24	4		10.95	82.09	6		13.25	70.7	8
sp|P43609|RSC8_YEAST	8	26.93	4		12.02	40.93	6		8.02	25.3	4
sp|Q12285|MDY2_YEAST	8	59.91	4		8	38.21	4		8.65	55.2	5
sp|P38836|ECM14_YEAST	8	33.95	4		9.5	32.79	8		12	33.5	7
sp|P39726|GCSH_YEAST	8	41.76	7		7.76	34.71	8		6	30	4
sp|P50946|OCA1_YEAST	8	26.47	5		6.98	36.55	4		6.01	43.3	3
sp|P38698|PPX1_YEAST	8	38.54	4		20.45	34.26	11		17.04	53.2	10
sp|Q04304|YMY0_YEAST	8	39.65	5		10.09	53.3	8		13.83	60.8	12
sp|P36156|GTO2_YEAST	8	41.35	5		6.27	38.92	5		14.18	46.5	8
sp|Q12040|YO283_YEAST	8	51.74	4		6.61	56.52	5		12.02	55.2	6
sp|P25631|YCU1_YEAST	8	49.55	4		16	67.12	8		15.09	57.2	8
sp|P52286|SKP1_YEAST	8	42.78	4		10	60.31	6		6.02	38.7	5
sp|Q12497|FMP16_YEAST	8	61.29	4		5.58	58.06	3		4.02	45.2	2
sp|P32610|VATD_YEAST	8	49.61	6		11.63	62.11	10		14.65	65.6	12
sp|P32897|TIM23_YEAST	8	45.5	8		11.39	54.5	9		10	37.4	7
sp|P12962|CAF20_YEAST	8	47.2	5		6	51.55	3		8	58.4	6
sp|Q3E841|YN034_YEAST	8	65.31	4		8.67	80.61	6		8	74.5	5
sp|P87108|TIM10_YEAST	8	63.44	4		8	60.22	5		10	75.3	6
sp|P25451|PSB3_YEAST	8	34.15	6		10.07	43.9	6		8	30.2	5
sp|P35195|ECM15_YEAST	8	72.12	9		2.27	72.12	2		4	57.7	3
sp|P02309|H4_YEAST	8	40.78	4		10	54.37	5		10	45.6	5
sp|P43588|RPN11_YEAST	7.92	57.19	4		10	39.22	6		8.18	43.1	5
sp|P38773|DOG2_YEAST	7.9	50.41	4		10.82	43.9	6		14.91	80.1	9
sp|Q08199|SIL1_YEAST	7.89	28.5	5		11.73	37.29	8		13.58	38.7	7
sp|P46151|MTHR1_YEAST	7.85	23.29	4		12.18	32.27	6		17.81	24.1	9
sp|P47119|ITPA_YEAST	7.85	49.75	4		14	64.47	12		12.03	57.9	10
sp|Q04951|SCW10_YEAST	7.77	19.28	4		14	24.94	7		9.92	30.3	5
sp|Q07418|PEX19_YEAST	7.74	40.35	4		8.81	41.81	8		4.92	42.1	7
sp|P32353|ERG3_YEAST	7.74	24.38	4		8.71	24.38	7		8.44	32.6	6
sp|P39936|IF4F2_YEAST	7.66	23.96	5		9.92	22.76	7		8.36	17.6	7
sp|P42942|YG4I_YEAST	7.66	32.36	4		9.03	33.09	7		10.03	40.9	5
sp|P16467|PDC5_YEAST	7.62	67.85	129		14.13	61.63	182		11.75	51.3	163
sp|P40469|MET18_YEAST	7.57	18.41	4		5.42	19.28	4		8.96	16.5	5
sp|Q3E792|RS25A_YEAST	7.57	52.78	5		6	42.59	4		2.84	22.2	3
sp|P28789|HEM3_YEAST	7.51	44.04	5		7.48	24.77	4		9.24	36.7	6
sp|P11938|RAP1_YEAST	7.5	26.48	8		14.05	40.63	9		15.24	36	13
sp|P36069|PMU1_YEAST	7.5	32.88	7		10.02	46.44	8		12.04	54.6	7
sp|P09734|TBA3_YEAST	7.46	46.52	12		12.47	53.71	15		7	46.1	11
sp|P27809|KRE2_YEAST	7.41	32.81	6		24.41	45.48	13		20.07	43.2	11
sp|P33331|NTF2_YEAST	7.31	66.4	16		21.89	81.6	29		16	81.6	27
sp|Q06338|BCP1_YEAST	7.3	34.98	5		4.88	44.88	6		9.04	40.3	5
sp|P32643|TMT1_YEAST	7.24	27.42	5		15.32	62.54	11		23.78	68.9	13
sp|Q07688|YPD1_YEAST	7.21	53.89	5		5.92	57.49	5		4.53	62.9	6
sp|P40513|MAM33_YEAST	7.05	47.74	4		8.02	42.48	6		8.01	27.4	5
sp|P33767|OSTB_YEAST	7.01	25.58	4		10.02	29.3	5		11.84	34.2	7
sp|P07285|TRPD_YEAST	7.01	37.89	6		12.84	43.16	8		12.04	33.7	7
sp|P52911|EXG2_YEAST	7	19.22	4		8	32.74	4		9.11	26.5	5
sp|P38689|KPR3_YEAST	6.94	41.87	4		8.01	42.19	5		14.08	61.3	10
sp|P53066|YGZ2_YEAST	6.92	39.23	6		13.72	62.98	10		10	37	7
sp|P40510|SER33_YEAST	6.85	55.86	20		9.09	60.55	23		8.56	51.2	15
sp|P40482|SEC24_YEAST	6.82	23.11	4		21.54	33.26	11		24.39	29.9	13
sp|P26755|RFA3_YEAST	6.81	55.74	4		4.39	46.72	3		5.96	41	5
sp|P53200|AML1_YEAST	6.8	30.24	5		6.37	29.84	4		10.05	31.1	7
sp|P10823|GPA2_YEAST	6.79	29.84	4		6.06	20.94	3		4.32	33.9	3
sp|P35189|TAF14_YEAST	6.76	56.15	5		7.85	56.15	6		7.57	63.5	5
sp|P38861|NMD3_YEAST	6.72	23.55	4		9.54	25.68	6		13.9	32.4	8
sp|P39940|RSP5_YEAST	6.65	30.28	4		10.12	31.03	6		10.24	35.9	7
sp|P38756|YHG3_YEAST	6.64	26.57	4		6.38	18.18	4		2	19.8	1
sp|P04037|COX4_YEAST	6.54	48.39	4		8.42	68.39	6		8.57	62.6	6
sp|Q05874|NNT1_YEAST	6.53	34.1	5		6.58	52.87	5		8	34.5	4
sp|Q12114|CHS5_YEAST	6.5	25.48	4		11.97	17.29	7		18.78	32.2	11
sp|Q04066|KFA_YEAST	6.49	23.37	4		4	13.41	2		7.52	31.8	5
sp|P40991|NOP2_YEAST	6.47	18.93	5		4.05	24.76	4		5.54	26.5	3
sp|P40483|YIK8_YEAST	6.47	28.45	4		4.56	20.26	5		6.05	19.7	5
sp|P19073|CDC42_YEAST	6.41	48.69	4		6	43.46	4		8.02	42.9	4
sp|P05374|CHO2_YEAST	6.4	21.17	4		8.02	17.26	4		11.65	26.7	7
sp|Q12044|RCN2_YEAST	6.36	46.04	6		10.37	61.13	7		12.36	64.2	8
sp|P52490|UBC13_YEAST	6.36	47.71	3		8.78	42.48	6		7.3	49	5
sp|P00927|THDH_YEAST	6.35	35.59	5		8	31.94	5		15.7	38.4	11
sp|P46984|GON7_YEAST	6.31	54.47	5		8	62.6	7		5.47	60.2	4
sp|P17883|SKI3_YEAST	6.3	18.78	4		5.73	26.4	3		2.39	25.4	3
sp|Q12165|ATPD_YEAST	6.3	63.75	6		11.23	73.12	8		8.24	60	8
sp|P25386|USO1_YEAST	6.29	26.7	3		7.46	27.43	5		5.64	26.3	5
sp|P25039|EFGM_YEAST	6.29	23.65	5		13.7	36.53	10		2.31	13.9	2
sp|Q04120|TSA2_YEAST	6.27	54.59	9		10.52	62.24	16		8.24	57.1	14
sp|Q03532|HAS1_YEAST	6.27	41.39	3		8.13	30.3	4		8.65	41.2	5
sp|P15436|DPOD_YEAST	6.26	14.49	3		2.01	14.86	1		4.55	14.2	3
sp|P43585|VTC2_YEAST	6.26	17.03	4		11.61	27.9	8		15.32	24.8	11
sp|P54964|ORN_YEAST	6.23	39.41	4		8.01	44.61	4		6.06	28.3	4
sp|Q04225|RRB1_YEAST	6.22	15.85	4		4	12.52	2		8.51	27.2	6
sp|Q04697|GSF2_YEAST	6.2	21.34	5		5.57	31.02	4		6.7	19.9	6
sp|Q04013|YHM2_YEAST	6.19	35.99	4		9.62	39.17	6		10.09	38.9	6
sp|P32528|DUR1_YEAST	6.16	21.42	4		10.59	19.24	8		14.05	28.5	7
sp|P32521|PAN1_YEAST	6.16	17.84	4		18.21	18.58	11		8.23	20.1	6
sp|P28625|YIM1_YEAST	6.16	32.6	4		11.44	41.92	6		14.82	61.1	10
sp|P08536|MET3_YEAST	6.14	41.1	4		11.53	42.47	6		5.33	38.4	3
sp|P46970|NMD5_YEAST	6.12	24.14	4		10.02	16.03	5		9.92	19.3	5
sp|P08679|CISY2_YEAST	6.1	55.65	8		7.93	47.83	9		12.04	35	9
sp|P23201|SPA2_YEAST	6.09	26.13	4		4.96	27.42	4		5.61	23.7	3
sp|P32608|RTG2_YEAST	6.09	32.14	4		12.28	35.37	8		11.12	44.1	7
sp|P38250|IST2_YEAST	6.09	27.59	4		4.09	21.67	3		8.09	25.7	8
sp|P25040|TSR4_YEAST	6.09	33.82	5		8.17	31.13	4		5.11	21.8	4
sp|P53044|UFD1_YEAST	6.09	31.02	4		10.02	35.46	5		11.37	36	6
sp|P46784|RS10B_YEAST	0	61.9	11		0	50.48	17		7.22	64.8	14
sp|P02293|H2B1_YEAST	6.08	35.11	7		0	29.77	8		6.41	36.6	8
sp|P21965|MCK1_YEAST	6.07	30.67	5		6.86	32.27	5		11.79	59.2	10
sp|P05744|RL33A_YEAST	6.07	38.32	4		2	38.32	6		2	48.6	6
sp|P41056|RL33B_YEAST	0	38.32	4		7.86	38.32	5		4.54	48.6	4
sp|P32767|KA122_YEAST	6.06	20.54	3		8.49	21.37	5		9.9	20.7	7
sp|P38840|ARO9_YEAST	6.05	43.66	5		10.47	23	7		10.19	27.3	7
sp|P32802|TMN1_YEAST	6.05	10.64	3		2.28	16.79	2		2.23	16.9	3
sp|P28321|MGLL_YEAST	6.04	51.12	3		4.22	30.99	2		6.59	48.9	4
sp|P47075|VTC4_YEAST	6.04	35.92	3		5.76	34.95	4		8.99	29	6
sp|P53164|NPY1_YEAST	6.04	24.74	3		2	11.46	2		6	10.9	3
sp|P46988|PFD1_YEAST	6.04	59.63	3		5.7	47.71	5		4.01	43.1	4
sp|P36049|EBP2_YEAST	6.03	29.04	3		2.81	30.91	3		5.78	23.2	4
sp|Q04636|POB3_YEAST	6.03	42.39	3		10.02	39.31	6		8.97	36.8	7
sp|Q03254|FCP1_YEAST	6.03	21.58	3		4.52	22.81	3		6.14	26.1	4
sp|P40856|SA185_YEAST	6.03	22.87	3		6.01	14.56	3		4.03	17.7	2
sp|P47047|MTR4_YEAST	6.03	23.67	3		4.19	30.66	3		11.72	35.5	7
sp|P40564|DJP1_YEAST	6.03	33.33	3		12	37.04	6		12.71	40.5	8
sp|P22213|SLY1_YEAST	6.03	25.98	3		6.02	25.23	3		8.25	31.4	5
sp|Q06682|UBX5_YEAST	6.03	13.8	4		6.37	37.2	4		4.71	18.8	3
sp|P38349|UBX7_YEAST	6.02	32.57	3		5.35	38.99	5		5.15	36.2	4
sp|P14741|EI2BA_YEAST	6.02	43.93	4		6.53	31.15	5		5.15	24.6	3
sp|P38348|HSM3_YEAST	6.02	39.58	4		10	26.67	6		7.16	25.6	7
sp|P38061|RL32_YEAST	6.02	51.54	5		7.32	30.77	11		7.02	40	9
sp|Q06143|DIC1_YEAST	6.02	36.91	4		10.47	51.68	6		8.11	38.6	5
sp|Q12029|FSF1_YEAST	6.02	40.06	4		4.46	31.5	3		4.55	46.2	3
sp|P26754|RFA2_YEAST	6.02	31.14	4		4.3	38.46	4		7.26	39.9	5
sp|Q05359|ERP1_YEAST	6.01	32.88	3		6.08	39.27	4		4	37	2
sp|Q07527|TRM3_YEAST	6.01	27.02	3		8.57	18.38	5		7.16	27.2	6
sp|P43583|BLM10_YEAST	6.01	17.45	3		4.08	16.24	3		10.07	15.3	5
sp|Q08162|RRP44_YEAST	6.01	24.78	3		6.02	23.98	3		12.49	24.3	8
sp|P21182|DCAM_YEAST	6.01	30.81	3		6.04	37.88	4		10.03	24.8	5
sp|P25644|PAT1_YEAST	6.01	24.25	3		8.06	25.75	4		12.16	30.3	6
sp|P40215|NDH1_YEAST	6.01	26.79	3		11.87	34.46	7		6.07	24.6	4
sp|P32447|ASF1_YEAST	6.01	36.56	3		6.43	22.94	4		4	12.5	2
sp|P42935|ELP2_YEAST	6.01	14.85	3		6.14	20.18	3		4.02	21.5	3
sp|P28007|GAR1_YEAST	6.01	51.22	3		4.01	53.66	3		6	47.3	3
sp|P40533|TED1_YEAST	6.01	22.41	3		6.03	15.01	3		5.52	18.4	3
sp|P47173|YJ9J_YEAST	6.01	20.76	3		10.01	36.26	5		6	35.1	4
sp|P38225|FAT1_YEAST	6.01	14.5	3		11.97	29.15	6		8.67	24.1	7
sp|P53615|CAN_YEAST	6.01	32.58	3		10	57.92	6		8.33	64.3	6
sp|P10622|RLA3_YEAST	6.01	42.45	7		8	42.45	10		7.62	33	11
sp|P11076|ARF1_YEAST	6	70.72	13		18.2	83.98	17		6	72.4	17
sp|P38711|RS27B_YEAST	6	62.2	7		8	73.17	10		8.01	62.2	7
sp|P30952|MASY_YEAST	6	28.52	3		7.7	18.41	4		8.36	39	4
sp|P38237|UBP14_YEAST	6	13.44	3		10.03	17.54	5		4.02	9.9	3
sp|Q02196|KAPS_YEAST	6	45.05	3		8.08	44.55	4		6.01	48	3
sp|Q06706|ELP1_YEAST	6	12.38	3		10.56	20.16	6		10.09	22.2	5
sp|P06785|TYSY_YEAST	6	63.82	3		8.68	50.33	5		8.27	69.4	6
sp|P29478|SEC65_YEAST	6	54.21	3		7.47	43.22	4		4	37.4	2
sp|P46971|PMT4_YEAST	6	12.2	4		4	16.54	2		5.81	11.6	4
sp|P32501|EI2BE_YEAST	6	18.68	3		10.01	33.01	5		12.01	26.3	7
sp|O13563|RPN13_YEAST	6	73.08	4		4.72	82.05	4		6.4	82.7	7
sp|P53849|GIS2_YEAST	6	50.98	8		6	40.52	7		6	36	9
sp|P53192|GET1_YEAST	6	29.79	3		6.16	29.79	4		8.01	44.7	4
sp|P20049|TYR1_YEAST	6	13.5	3		3.26	26.11	3		8	18.8	5
sp|P16370|RPB3_YEAST	6	25.16	4		10.01	33.65	6		12.4	51.9	7
sp|P53332|COAD_YEAST	6	32.79	3		5.93	33.11	4		4.01	41	2
sp|P40005|PFD2_YEAST	6	72.97	3		3.48	41.44	3		3.93	51.4	3
sp|P38340|NTM1_YEAST	6	46.98	3		8.04	71.55	5		6	47.4	3
sp|P53929|YNK8_YEAST	6	44.07	3		13.08	53.7	7		14.4	54.1	7
sp|P47818|CCC1_YEAST	6	47.52	3		8	41.61	5		9.71	31.4	5
sp|P04912|H2A2_YEAST	0	71.21	3		4	28.03	3		6.63	50.8	6
sp|P39938|RS26A_YEAST	0	52.94	7		6.01	49.58	6		6.85	50.4	6
sp|P16965|STF2_YEAST	6	83.33	6		4.93	95.24	5		4.66	89.3	5
sp|Q05778|POC1_YEAST	6	34.78	3		6.27	59.42	3		7.38	30.8	4
sp|Q03034|FDC1_YEAST	6	16.5	4		6.1	30.62	3		12.67	37.8	8
sp|P38345|FMP21_YEAST	6	33.33	3		4.48	43.48	3		6.69	46.4	5
sp|Q06497|ANT1_YEAST	6	29.27	3		8.02	36.28	4		8	38.1	4
sp|Q05521|DPP1_YEAST	6	17.99	3		2	10.38	1		2	17.3	1
sp|Q02767|VPS28_YEAST	6	22.31	3		6	29.34	4		6.02	26.5	3
sp|P39929|SNF7_YEAST	6	30	6		6.11	45	7		8.32	38.8	9
sp|P38131|KTR4_YEAST	6	13.36	4		14.99	53.02	9		10	31.9	6
sp|P33317|DUT_YEAST	6	34.69	3		7.12	30.61	4		8.44	40.1	5
sp|P32774|T2AG_YEAST	6	45.08	4		4.01	47.54	3		8.97	77.1	6
sp|P28000|RPAC2_YEAST	6	41.55	3		12	73.24	6		6.15	57.8	4
sp|P15731|UBC4_YEAST	6	40.54	7		8.37	43.92	15		8.06	37.8	11
sp|P38109|YBY9_YEAST	6	13.19	5		6	20.28	4		4.01	12.2	2
sp|P32804|ZRT1_YEAST	6	15.43	3		4.01	11.97	2		9.93	21.5	5
sp|P39010|AKR1_YEAST	5.87	16.75	3		10.12	26.83	5		13.55	19.5	8
sp|P0CX34|RS30B_YEAST	5.81	63.49	5		4.11	38.1	3		4.07	33.3	3
sp|P20486|CKS1_YEAST	5.8	44.67	4		2.1	36	2		1.72	38.7	2
sp|P25623|SYP1_YEAST	5.79	19.43	5		7.65	17.7	5		8.02	14.1	8
sp|P49167|RL38_YEAST	5.76	75.64	4		9.96	50	8		10.57	51.3	8
sp|Q12234|RUD3_YEAST	5.75	41.74	3		4	36.98	2		2	15.9	1
sp|P49095|GCSP_YEAST	5.75	22.15	4		5.04	23.4	7		7.27	26.8	5
sp|P53617|NRD1_YEAST	5.68	12.87	3		8.01	18.78	5		3.65	18.4	4
sp|P32915|SC61A_YEAST	5.6	23.75	3		6	16.67	4		6.03	18.1	4
sp|P48606|TBCA_YEAST	5.48	70.75	5		8.28	66.04	7		11.64	63.2	7
sp|Q12055|KAD6_YEAST	5.47	23.35	3		3.92	28.43	2		4.83	40.6	4
sp|P32191|GPDM_YEAST	5.46	43.91	3		24.35	51.77	13		13.72	37.6	9
sp|Q06169|PEX30_YEAST	5.45	28.3	3		4	19.31	2		4.5	15.3	3
sp|Q06010|STE23_YEAST	5.43	21.32	4		14.1	18.5	8		14.88	30.5	9
sp|P20424|SRP54_YEAST	5.42	22.18	5		7.65	27.73	4		7.3	25	5
sp|P05749|RL22A_YEAST	5.4	47.11	6		5.59	65.29	8		5.58	61.2	7
sp|P38221|CDS1_YEAST	5.39	11.6	3		4.12	26.26	2		2.6	7.4	2
sp|P27637|BUD14_YEAST	5.38	21.86	3		3.08	29.06	3		5.03	24.4	3
sp|P22336|RFA1_YEAST	5.37	21.74	5		13.88	32.05	7		9.71	26.3	7
sp|P38074|HMT1_YEAST	5.36	30.46	3		12.46	38.51	7		6.99	45.7	4
sp|Q04338|VTI1_YEAST	5.34	44.7	3		2.71	52.07	2		6.99	64.1	4
sp|Q05881|YL287_YEAST	5.33	32.11	5		6.2	36.34	4		4.89	33.2	3
sp|Q12500|AVL9_YEAST	5.32	24.61	3		7.92	20.16	6		8.01	28.3	5
sp|Q06103|RPN7_YEAST	5.3	41.03	3		14.22	44.99	9		11.73	42.4	9
sp|P32803|EMP24_YEAST	5.29	40.89	3		6.74	55.67	5		8.47	52.7	5
sp|Q12532|TAE2_YEAST	5.29	6.358	3		4.78	22.35	3		6.01	20.2	6
sp|Q12463|TRM11_YEAST	5.26	24.94	3		4.95	26.33	3		4.02	18.9	2
sp|Q12000|TMA46_YEAST	5.17	44.35	3		2.02	43.19	1		4.75	31	3
sp|P34730|BMH2_YEAST	5.13	76.92	47		4.91	75.46	59		4	76.6	59
sp|Q04439|MYO5_YEAST	5.11	36.01	5		6.37	18.95	5		2.63	24.1	2
sp|Q12156|AIM7_YEAST	5.05	48.32	3		2.71	20.13	2		3.6	17.5	2
sp|P36160|RPF2_YEAST	4.98	28.78	3		4.69	22.38	3		4.01	43.3	2
sp|P07275|PUT2_YEAST	4.97	29.39	4		16.77	49.22	10		20.92	41.9	11
sp|P53900|PFD4_YEAST	4.86	60.47	3		11.03	68.99	7		11.55	51.2	7
sp|Q99321|DDP1_YEAST	4.85	51.6	4		8.01	43.09	4		10.09	54.8	6
sp|Q06608|PDXH_YEAST	4.82	38	5		10	69	7		8	66	5
sp|Q12512|ZPS1_YEAST	4.81	42.57	4		6.01	29.72	3		6	36.6	3
sp|Q12452|ERG27_YEAST	4.8	35.16	4		15.17	50.72	9		14.83	55	11
sp|P20435|RPAB2_YEAST	4.8	43.87	4		4	58.71	2		4	38.1	3
sp|P20447|DBP3_YEAST	4.79	41.11	4		6.03	19.89	4		6.02	24.7	4
sp|Q03497|STE20_YEAST	4.79	31.2	3		6.01	32.59	4		7	18.4	6
sp|P38138|GLU2A_YEAST	4.78	12.37	3		10.33	19.5	7		6.48	20.8	4
sp|P47133|EMC2_YEAST	4.78	31.16	3		5.88	27.05	3		5.83	18.8	3
sp|P38328|ARPC1_YEAST	4.75	16.41	3		8.02	32.29	5		8	43	4
sp|Q12402|YOP1_YEAST	4.74	17.22	3		4.25	22.22	3		2.47	15.6	3
sp|P40970|LCB2_YEAST	4.72	30.48	4		6.85	42.07	5		12.02	32.8	6
sp|Q03771|YD161_YEAST	4.71	42.12	3		11.34	35.92	6		7.53	27.7	4
sp|P20604|PP11_YEAST	4.69	15.76	3		8.49	45.34	8		4.4	24.8	3
sp|P38067|UGA2_YEAST	4.68	42.45	4		11.27	28.77	8		9.26	37.8	7
sp|P36024|SIS2_YEAST	4.67	33.99	4		6.02	31.14	4		4.69	34	4
sp|P0CX81|MTCU2_YEAST	4.65	52.46	6		4	39.34	7		3.92	41	6
sp|P40579|YIV5_YEAST	4.62	24.02	4		8.17	26.38	6		10	42.5	5
sp|P32477|GSH1_YEAST	4.58	25.22	3		4.55	20.94	5		8.17	19.5	6
sp|P06782|SNF1_YEAST	4.57	32.07	4		11.15	29.54	6		12.08	26.4	9
sp|Q06336|GGA1_YEAST	4.49	16.34	3		6.35	50.27	5		6.13	28.2	3
sp|Q99189|MTR10_YEAST	4.49	21.09	3		3.81	18.83	3		8.04	21.4	4
sp|P43555|EMP47_YEAST	4.47	25.39	3		3.52	27.19	4		9.35	25.8	6
sp|P35180|TOM20_YEAST	4.47	40.98	3		8.77	35.52	5		8.03	51.9	5
sp|P40474|QDR2_YEAST	4.46	22.88	3		4.01	13.28	3		2.5	22.1	2
sp|P25043|PSB2_YEAST	4.46	27.2	3		4.82	37.55	6		4.59	52.5	4
sp|P38793|TRM5_YEAST	4.44	27.05	3		6.99	22.85	4		6	12.8	3
sp|P53633|PRA1_YEAST	4.38	30.11	3		8	24.43	5		6.45	29.6	4
sp|P17106|CBF1_YEAST	4.36	36.47	3		6.97	25.93	4		6.65	29.6	5
sp|Q12009|TRMB_YEAST	4.34	26.22	2		8.31	22.38	5		4.71	27.6	3
sp|P04161|PUR3_YEAST	4.34	51.87	3		9.07	44.86	6		8	52.3	4
sp|P48015|GCST_YEAST	4.33	27.75	3		10.81	47	7		15.27	54.3	9
sp|P10127|ADH4_YEAST	4.32	28.27	5		4.57	27.75	5		7.13	33.3	5
sp|P20107|ZRC1_YEAST	4.31	21.49	3		2	10.63	1		2	10.4	1
sp|P53959|COG6_YEAST	4.3	32.78	3		4.19	22.17	3		5.56	27.7	3
sp|P53883|NOP13_YEAST	4.3	52.36	3		5.42	28.54	4		8.45	45.7	6
sp|P53163|MNP1_YEAST	4.28	40.21	4		4.03	40.21	2		4.66	52.6	3
sp|Q12017|PLP2_YEAST	4.27	31.82	2		4.21	40.91	3		4	17.8	2
sp|Q07938|MTAP_YEAST	4.27	24.63	2		4.46	16.02	4		7.53	19.3	4
sp|P53078|SDT1_YEAST	4.24	20	2		8.02	33.57	4		6.34	26.1	4
sp|Q12242|RUP1_YEAST	4.23	18.63	4		6.02	26.53	4		6	10.4	3
sp|P38314|SDS24_YEAST	4.22	15.18	5		8.86	39.66	10		9.82	29	7
sp|P32347|DCUP_YEAST	4.22	45.03	3		13.41	40.61	10		11.87	42.5	8
sp|P38626|NCB5R_YEAST	4.21	24.65	3		12.05	45.42	6		10.02	54.6	5
sp|P53199|ERG26_YEAST	4.21	23.21	3		9.05	50.14	7		6.04	38.7	3
sp|P22138|RPA2_YEAST	4.2	25.77	2		18.83	40.48	13		17.52	31.2	12
sp|P38325|OM14_YEAST	4.2	38.81	2		4.63	58.21	5		4.27	43.3	3
sp|P07273|TFS2_YEAST	4.18	33.98	3		4.02	45.95	2		6.05	29.1	3
sp|P40545|HIS4_YEAST	4.16	43.3	3		7.35	51.72	5		2.5	33	3
sp|Q03219|YM44_YEAST	4.14	32.48	2		10.04	44.53	5		6.01	25.9	3
sp|P53885|MDG1_YEAST	4.13	30.6	2		8.41	26.78	5		8.44	35.3	4
sp|P39007|STT3_YEAST	4.11	15.6	4		4.02	16.3	3		6.04	13.4	3
sp|P09032|EI2BG_YEAST	4.11	38.24	2		2.01	12.11	2		4.08	24.4	3
sp|P38130|KTR3_YEAST	4.1	21.29	3		2.87	40.1	2		4.16	31.9	2
sp|P53299|TIM13_YEAST	4.1	64.76	4		4.4	74.29	5		6	49.5	4
sp|P32505|NAB2_YEAST	4.09	20.76	2		9.54	31.05	5		4.1	19.1	2
sp|Q06053|DUS3_YEAST	4.08	33.08	2		3.74	22.75	2		3.11	20.2	2
sp|P50109|PSP2_YEAST	4.08	27.99	2		11.82	32.04	7		14.28	42.3	10
sp|P50108|MNN10_YEAST	4.06	35.11	3		4	10.94	2		6.01	30	3
sp|P24276|SSD1_YEAST	4.05	24.8	2		11.72	29.44	7		6.08	25.5	3
sp|Q12329|HSP42_YEAST	4.05	27.2	4		2	18.93	1		2.48	14.4	2
sp|P39729|RBG1_YEAST	4.05	33.33	2		4	23.04	2		6	29.8	3
sp|P45978|SCD6_YEAST	4.05	23.21	2		4.01	41.26	2		2.92	9.5	2
sp|P46669|RPA43_YEAST	4.05	27.3	3		4.29	30.98	3		4.35	39	3
sp|P25367|RNQ1_YEAST	4.05	20.25	3		4	23.21	2		6.1	28.9	4
sp|Q08954|YP199_YEAST	4.05	19.58	4		2.34	23.75	2		6.7	30.4	4
sp|P47771|ALDH2_YEAST	4.04	65.81	19		4.33	73.32	22		5.8	58.3	23
sp|P00331|ADH2_YEAST	4.04	83.33	39		4.32	62.93	51		2	57.2	48
sp|P32502|EI2BB_YEAST	4.04	26.25	2		2.02	32.81	1		4.28	39.6	2
sp|P39692|MET10_YEAST	4.03	17.49	2		21.76	23.57	12		17.96	24.8	11
sp|P36041|EAP1_YEAST	4.03	19.15	3		6.38	26.11	4		7.42	34	7
sp|Q12341|HAT1_YEAST	4.03	20.05	4		6.01	20.86	3		4	12.6	3
sp|P04650|RL39_YEAST	4.03	21.57	5		2	47.06	2		2.19	41.2	2
sp|Q12514|NOT5_YEAST	4.02	30	2		2	15.71	1		2.01	26.1	1
sp|P52488|UBA2_YEAST	4.02	24.06	2		4.03	27.67	2		16.13	41.7	8
sp|P43603|LSB3_YEAST	4.02	21.57	3		6.02	21.35	3		6	25.1	3
sp|P15424|MS116_YEAST	4.02	21.99	2		2.01	31.63	1		2.02	43.5	1
sp|P32465|HXT1_YEAST	4.02	18.6	3		4.1	10.7	2		4	10.4	4
sp|P34217|PIN4_YEAST	4.02	11.68	3		4	13.32	3		4.01	11.8	2
sp|P16451|ODPX_YEAST	4.02	12.2	2		6.1	28.54	3		6.03	36.8	3
sp|Q12091|DAP1_YEAST	4.02	40.13	3		4.04	40.13	2		2.04	34.2	3
sp|P17076|RL8A_YEAST	4.01	72.66	32		36.8	68.36	32		31.2	59.8	34
sp|P32419|MDHP_YEAST	4.01	34.4	3		6	27.41	3		10.96	47.2	6
sp|P23337|GYS1_YEAST	4.01	33.33	3		4.65	24.01	6		6.02	28.7	7
sp|Q04632|COG8_YEAST	4.01	22.08	2		10.05	29.82	5		6.03	33.9	3
sp|Q06697|CDC73_YEAST	4.01	23.16	2		2.09	29.77	2		2.01	12.2	1
sp|P42842|EMW1_YEAST	4.01	30.86	2		10.17	36.39	6		7.96	27.9	4
sp|P53741|BRE5_YEAST	4.01	39.81	2		5.45	38.06	4		5.63	38.8	4
sp|P48365|GYP7_YEAST	4.01	22.39	2		2	15.15	1		2	9.8	1
sp|P38932|VPS45_YEAST	4.01	20.45	2		2.01	15.94	1		2.12	24.8	1
sp|Q12427|STB3_YEAST	4.01	25.93	2		3.68	27.49	2		2.01	24.6	1
sp|P40319|ELO3_YEAST	4.01	18.84	2		6	11.01	4		8.25	21.2	5
sp|P31384|CCR4_YEAST	4.01	15.89	2		2	13.38	1		1.86	26.9	2
sp|P32591|SWI3_YEAST	4.01	22.67	2		2	18.55	1		4.54	29	3
sp|Q07807|PUF3_YEAST	4.01	19.45	2		4.04	20.71	2		2	19.2	1
sp|P11792|SCH9_YEAST	4.01	13.59	2		6.02	11.41	3		5.81	9.2	4
sp|Q04458|HFD1_YEAST	4.01	21.24	2		4.01	20.3	2		0.28	7.1	1
sp|P53962|YND5_YEAST	4.01	41.9	2		2.49	40.36	2		3.34	43.4	3
sp|P43577|GNA1_YEAST	4.01	56.6	2		8.1	47.17	5		6.01	41.5	3
sp|P35178|RRP1_YEAST	4.01	37.77	3		4	33.45	3		4.03	32.4	3
sp|P53045|MSMO_YEAST	4.01	21.04	2		4	15.53	2		6	34.3	3
sp|P40959|MVP1_YEAST	4.01	18	2		2.01	20.74	1		4.81	24.1	4
sp|P39742|SEC72_YEAST	4.01	35.75	2		4.05	38.34	3		5.62	40.4	3
sp|P11633|NHP6B_YEAST	4.01	51.52	2		2	48.48	2		6	31.3	3
sp|Q3E772|YG169_YEAST	4.01	52.17	2		4.01	43.48	3		5.66	59.8	4
sp|Q12355|PST1_YEAST	4.01	12.84	2		4	28.38	2		2	20.5	1
sp|Q05788|PNPH_YEAST	4.01	18.33	3		10	26.69	6		10.59	48.9	6
sp|P61830|H3_YEAST	4.01	38.97	2		2	31.62	4		2	41.2	6
sp|P00128|QCR7_YEAST	4.01	44.09	2		4	46.46	2		7.27	64.6	4
sp|P53276|UTP8_YEAST	4.01	9.116	4		6	25.11	3		6.01	32.5	3
sp|P10664|RL4A_YEAST	4	61.6	54		4	65.47	75		4	62.2	74
sp|P38555|YPT31_YEAST	4	75.34	7		11.85	78.03	8		10.3	59.6	7
sp|P01119|RAS1_YEAST	4	36.89	4		2	47.25	4		4	35.3	3
sp|Q12220|UTP12_YEAST	4	20.78	2		4.02	20.15	2		4.05	21.9	2
sp|P05626|ATPF_YEAST	4	49.18	2		4	20.9	3		6	29.1	3
sp|Q12191|BUG1_YEAST	4	37.54	2		1.25	16.72	1		2	32.8	1
sp|Q12387|NAA25_YEAST	4	24.25	2		4.01	11.56	2		3.63	10.8	2
sp|Q04201|CUE4_YEAST	4	27.35	3		2	27.35	1		2	23.9	1
sp|P06104|UBC2_YEAST	4	33.14	3		6	44.77	5		6.02	48.8	7
sp|P12754|EI2BD_YEAST	4	23.5	2		2.88	9.831	2		2.02	16.1	1
sp|Q04410|GRH1_YEAST	4	18.82	3		7.62	15.32	4		11.39	28.8	7
sp|P50276|MUP1_YEAST	4	10.98	3		2	4.007	1		2	14.6	1
sp|Q99316|MPD2_YEAST	4	49.82	2		5.82	26.71	3		4.03	32.1	3
sp|P53326|YG5L_YEAST	4	15.83	2		6.03	18.97	3		8.02	16.6	4
sp|P53297|PBP1_YEAST	4	13.3	3		2.03	28.25	1		0.79	21.5	2
sp|P34163|TGL1_YEAST	4	22.45	3		7.43	28.47	4		1.66	10.8	1
sp|P38333|ENP1_YEAST	4	17.81	2		8.02	25.88	4		6.01	18	3
sp|P38079|YRO2_YEAST	4	19.19	3		2	9.593	3		6	18.3	3
sp|Q07589|YD144_YEAST	4	23.6	2		6	14.04	3		7.45	22.5	4
sp|Q03880|PKR1_YEAST	4	34.43	2		2	27.87	1		2.02	38.5	1
sp|P11632|NHP6A_YEAST	4	65.59	2		6	46.24	3		2.01	48.4	2
sp|P46956|PHO86_YEAST	4	15.11	2		6	29.26	3		4	13.5	2
sp|P38930|CSK2C_YEAST	4	36.43	2		5.8	47.67	4		5.45	58.1	4
sp|P38825|TOM71_YEAST	4	22.07	2		5.03	25.35	4		6	26.5	3
sp|P53172|SDS23_YEAST	4	25.24	2		4	11.2	3		4	22.2	3
sp|Q06451|TPO3_YEAST	4	15.76	2		4	14.31	2		4	7.9	2
sp|P49957|TRM9_YEAST	4	22.94	2		6.4	35.48	4		3.93	23.7	2
sp|P38238|TRM7_YEAST	4	22.26	2		0.31	10.65	1		2	25.2	1
sp|Q96VH5|MOS1_YEAST	4	53.61	2		4	52.58	2		4	70.1	2
sp|P40043|RGI1_YEAST	4	37.27	2		4	68.32	3		4.01	41.6	2
sp|P40040|THO1_YEAST	4	43.12	2		6	44.5	3		4.14	54.6	3
sp|P40008|FMP52_YEAST	4	32.47	4		10.02	33.33	6		9.24	52.4	6
sp|P38139|LDH1_YEAST	4	21.33	2		2.01	16.8	1		2.21	18.9	3
sp|P27999|RPB9_YEAST	4	45.08	2		2	34.43	1		2	12.3	1
sp|P14682|UBC3_YEAST	4	15.93	2		2.99	14.92	2		2.04	16.6	2
sp|Q12349|ATP14_YEAST	4	47.58	2		4.77	69.35	5		6	47.6	5
sp|Q07540|FRDA_YEAST	4	36.78	3		4.01	36.21	2		6	36.2	3
sp|Q06689|YL413_YEAST	4	8.889	2		4	8.148	2		5.91	19.3	3
sp|Q06672|TSR2_YEAST	4	8.293	2		2.04	12.2	1		2	13.7	1
sp|P53897|IGO1_YEAST	4	32.74	2		2.39	21.43	2		2	47.6	1
sp|P49334|TOM22_YEAST	4	46.05	2		6.01	36.84	3		8	66.5	6
sp|P46992|YJR1_YEAST	4	15.4	2		6.51	18.69	7		6	20.5	4
sp|P35202|THI80_YEAST	4	20.69	2		5.25	28.84	5		2	27.6	2
sp|P25515|VATL1_YEAST	4	38.12	2		4	31.87	3		4	40.6	2
sp|Q12127|CCW12_YEAST	4	16.54	2		0	12.78	2		4	28.6	2
sp|Q04767|TVP18_YEAST	4	19.76	2		6	20.36	3		4	19.8	2
sp|P87262|RL34A_YEAST	4	23.97	3		3.52	27.27	4		2.82	45.5	2
sp|P53738|TR112_YEAST	4	15.56	2		2.37	22.22	2		3.3	31.9	3
sp|P40165|NNRE_YEAST	4	14.23	2		4	21.14	2		7.66	41.1	4
sp|P25659|YCW6_YEAST	4	11.6	2		8	25.2	4		6	23.6	3
sp|P08456|PSS_YEAST	4	21.74	3		3.29	17.39	4		6.22	22.5	5
sp|Q03559|YM8V_YEAST	4	27.92	2		6.98	74.11	6		6.1	43.2	5
sp|P80967|TOM5_YEAST	4	30	2		6.01	80	3		4.3	70	3
sp|P35127|UBL1_YEAST	4	11.44	2		4.18	32.63	3		6.78	48.7	4
sp|P32842|VATL2_YEAST	4	32.32	2		2	10.98	1		2	11	1
sp|P32352|ERG2_YEAST	4	11.71	3		6	19.37	5		6	41.9	6
sp|P29703|FNTA_YEAST	4	11.71	2		6.01	21.2	3		6.04	27.5	3
sp|P00127|QCR6_YEAST	4	31.97	5		2.24	26.53	2		2	35.4	1
sp|O60200|MDM35_YEAST	4	43.02	2		0.44	29.07	1		1.74	16.3	1
sp|O13547|CCW14_YEAST	4	15.97	4		2	25.21	4		4	23.5	6
sp|P33328|SNC2_YEAST	3.93	45.22	2		4	33.91	2		4	32.2	2
sp|P54781|ERG5_YEAST	3.92	26.39	3		2.01	19.33	1		4.01	33.6	2
sp|Q05567|SGPL_YEAST	3.9	20.54	4		8.02	25.13	4		7.34	24.5	6
sp|P33338|SLA2_YEAST	3.86	22.11	2		4.6	21.28	4		7.04	22.1	5
sp|P53177|TYW3_YEAST	3.86	31.14	2		3.93	48.35	2		2	40.7	1
sp|Q06406|LSM6_YEAST	3.86	48.84	2		4	59.3	2		6.26	82.6	3
sp|P32583|SRP40_YEAST	3.85	15.76	2		4.02	16.5	2		5.66	13.3	3
sp|P53890|BNI5_YEAST	3.79	22.77	3		4.19	21.88	2		1.83	38.2	2
sp|Q12494|KCS1_YEAST	3.79	13.9	2		1.09	17.14	1		6.05	23.2	6
sp|Q00816|REG1_YEAST	3.78	11.93	2		5.1	19.53	4		6.43	17.2	4
sp|Q08421|ETT1_YEAST	3.78	21.6	2		4.65	29.37	3		10.21	31.3	6
sp|P36076|CAB3_YEAST	3.77	20.67	2		2	16.81	1		2.01	13.1	1
sp|Q12207|NCE2_YEAST	3.77	24.28	3		4	24.28	3		2	19.1	3
sp|P38841|YHT8_YEAST	3.77	32.46	2		2.03	21.05	1		1.74	9.6	1
sp|Q03774|TRM82_YEAST	3.75	18.69	3		6.2	39.86	4		13.2	46.9	9
sp|P36051|MCD4_YEAST	3.72	5.223	2		2.81	7.073	2		4.01	12.7	2
sp|P53043|PPT1_YEAST	3.69	42.3	3		11.7	48.34	11		9.77	38.4	5
sp|P32457|CDC3_YEAST	3.68	35	2		7.56	28.27	4		4.3	19	3
sp|P39727|ERV46_YEAST	3.68	23.86	2		4	17.11	2		4	27	2
sp|Q92317|NCB2_YEAST	3.68	45.89	2		4.48	46.58	4		4	49.3	3
sp|Q01519|COX12_YEAST	3.67	63.86	3		4	57.83	3		4	39.8	2
sp|P39993|GEA2_YEAST	3.66	22.76	2		2.04	15.63	1		3.35	14.1	2
sp|P32867|SSO1_YEAST	3.62	52.41	5		5.25	25.52	3		5.55	27.2	3
sp|O13297|CET1_YEAST	3.56	28.42	4		8.59	31.33	5		6.92	23.7	4
sp|P53859|CSL4_YEAST	3.54	14.04	2		2.01	34.59	2		2	7.9	1
sp|P43619|NADC_YEAST	3.5	26.1	3		11.53	53.56	9		7.82	37.6	5
sp|P32579|SUA5_YEAST	3.48	24.41	2		2	14.08	1		0.24	7.7	1
sp|P38853|KEL1_YEAST	3.47	18.47	3		9.42	37.8	6		11.02	31.9	9
sp|P33755|NPL4_YEAST	3.45	30.34	2		6.05	25.69	3		6.08	25.7	4
sp|P10507|MPPB_YEAST	3.44	31.39	2		3.86	44.59	2		2.01	18	1
sp|P38911|FKBP3_YEAST	3.42	25.3	3		6.02	18.98	3		3.67	24.6	3
sp|Q99385|VCX1_YEAST	3.4	13.87	3		3.32	11.92	2		3.55	11.9	2
sp|P53893|RIA1_YEAST	3.38	16.4	2		4.02	21.98	2		2.67	14.9	2
sp|Q12008|PMG2_YEAST	3.37	27.65	3		2.5	40.19	2		7.17	47.3	5
sp|P19812|UBR1_YEAST	3.35	10.51	2		4.01	17.54	2		2	10.6	1
sp|P00572|KTHY_YEAST	3.33	38.89	2		2	21.3	1		2	30.1	2
sp|P25358|ELO2_YEAST	3.32	12.1	2		2	19.88	1		0.51	7.2	1
sp|P38636|ATX1_YEAST	3.27	82.19	2		4.09	68.49	2		4.07	58.9	2
sp|P13586|ATC1_YEAST	3.26	21.37	5		7.85	20.74	4		13.13	28.4	10
sp|P40364|MPM1_YEAST	3.23	23.02	2		4	26.19	2		4.01	19.1	2
sp|Q99394|TRS33_YEAST	3.23	12.31	2		4	17.16	2		2	12.7	2
sp|P32495|NHP2_YEAST	3.22	32.05	3		0.74	41.03	3		7.25	48.1	4
sp|Q04430|PANK_YEAST	3.22	12.26	2		4	24.52	2		3.71	31.3	3
sp|P43561|FET5_YEAST	3.21	13.34	3		5.64	17.2	6		4.88	13.7	4
sp|P40472|SIM1_YEAST	3.12	8.824	2		4	5.462	2		6	7.8	3
sp|Q3E764|TMA7_YEAST	3.09	60.94	3		2.02	34.38	1		2.13	42.2	2
sp|P30902|ATP7_YEAST	3.08	44.83	4		8.84	51.15	5		2.67	23	2
sp|P36123|SA190_YEAST	3.07	11.23	2		13.23	17.91	7		7.5	24.5	6
sp|Q08742|RDL2_YEAST	3.07	36.24	2		4	39.6	2		3.03	45.6	2
sp|Q12277|RRP42_YEAST	3.06	31.32	2		4.1	22.26	3		3.61	32.1	3
sp|P50623|UBC9_YEAST	3.06	22.29	2		4.07	37.58	2		4	40.1	2
sp|P39104|PIK1_YEAST	3.02	25.05	2		2.02	18.2	1		3.85	18.4	2
sp|P32468|CDC12_YEAST	3	23.34	2		2.01	22.11	1		4.01	16.5	2
sp|P38902|RPB11_YEAST	3	37.5	2		5.88	55	4		3.07	32.5	3
sp|P39105|PLB1_YEAST	2.95	13.25	3		6.21	17.02	5		2.02	15.1	3
sp|P40893|REE1_YEAST	2.89	41.92	2		8.15	48.99	5		4.37	52.5	4
sp|P08539|GPA1_YEAST	2.85	31.99	2		6.02	53.81	3		2.11	30.9	2
sp|P22579|SIN3_YEAST	2.77	17.77	2		10.03	19.4	5		5.88	16.2	4
sp|Q04773|YMW4_YEAST	2.77	29.66	4		5.64	40.69	4		5.52	32.4	4
sp|Q05933|ARPC3_YEAST	2.75	48.88	2		10.23	71.35	6		11.34	77	7
sp|P47001|CIS3_YEAST	2.73	6.608	3		4.01	15.42	3		4	6.6	3
sp|Q06106|MRD1_YEAST	2.68	23.56	2		2.05	28.75	1		0.67	20.9	2
sp|Q05948|YL225_YEAST	2.68	33.42	2		6.04	39.07	3		4.22	30.2	3
sp|P53095|DSD1_YEAST	2.68	26.64	4		2.08	25.7	1		4.01	21	4
sp|Q05031|DFG5_YEAST	2.6	14.19	2		5.66	24.45	3		4	28.8	2
sp|Q08925|MRN1_YEAST	2.57	19.28	2		3.86	16.5	2		2.46	14.4	2
sp|Q03529|SCS7_YEAST	2.54	18.23	3		2	19.01	1		4.01	21.6	2
sp|Q07897|CMS1_YEAST	2.53	49.48	3		3.86	27.84	2		2.03	51.9	1
sp|P21306|ATP5E_YEAST	2.53	93.55	2		12.52	85.48	7		8.56	85.5	6
sp|P38732|EFM1_YEAST	2.43	26.15	2		4	16.92	2		6	18.1	3
sp|P54070|KTR6_YEAST	2.39	16.59	2		6.02	36.1	3		5.13	33.9	3
sp|P53133|YGL7_YEAST	2.37	26.79	2		2.07	33.96	1		2.44	35.1	2
sp|Q06677|SWA2_YEAST	2.34	30.69	2		2	18.11	1		4.02	19.3	2
sp|P40098|FMP10_YEAST	2.32	28.28	2		2.01	49.59	1		3.62	43.9	2
sp|P01094|IPA3_YEAST	2.3	89.71	2		3.32	75	2		2	55.9	1
sp|P35184|SQT1_YEAST	2.28	17.4	2		6.88	24.36	4		4.22	12.3	3
sp|P34248|YKK0_YEAST	2.27	16.35	2		5.09	10.39	3		5.1	12.1	4
sp|P50896|PSP1_YEAST	2.24	9.631	2		4.15	20.57	2		2.2	13.2	2
sp|Q03496|TR732_YEAST	2.23	16.76	3		4.04	16.48	3		9.76	25.1	8
sp|P09880|TRNL_YEAST	2.23	19.59	2		2.05	26.72	2		3.77	27	3
sp|Q03973|HMO1_YEAST	2.23	24.8	2		2	15.85	1		4.01	24.8	2
sp|P38230|QOR_YEAST	2.2	25.75	2		4.01	18.56	2		2.01	41	1
sp|P48582|BRO1_YEAST	2.19	25.59	2		6.05	20.02	3		4.06	29.6	4
sp|P38688|SRP72_YEAST	2.19	20.94	1		4.56	17.66	3		3.5	20	2
sp|P39013|END3_YEAST	2.19	45.27	1		6.05	40.11	5		5.78	25.2	5
sp|P36132|KAE1_YEAST	2.18	19.95	1		2.02	26.42	2		10.02	48.2	5
sp|P38137|FAT2_YEAST	2.18	18.6	1		3.01	24.68	3		8.01	33	4
sp|P12688|YPK1_YEAST	2.17	11.76	2		8.01	22.06	4		11.59	29.3	9
sp|P47103|CYP7_YEAST	2.16	20.36	2		5.93	27.23	4		4.03	35.1	2
sp|P48813|GNP1_YEAST	2.15	13.88	2		4	11.61	3		3.05	15.7	2
sp|P33201|MRT4_YEAST	2.14	36.02	1		2	8.475	1		5.68	38.6	3
sp|Q3E793|YA044_YEAST	2.14	61.82	3		2.1	60.91	2		2.23	80.9	2
sp|P33302|PDR5_YEAST	2.12	11.78	1		2.47	18.27	2		5.61	17.8	3
sp|P36154|AIM29_YEAST	2.11	65.81	2		3.14	59.35	2		2.25	44.5	2
sp|P33418|XPOT_YEAST	2.11	14.36	1		6.47	24.45	4		5.26	17.1	3
sp|P35179|SC61G_YEAST	2.08	35	1		2.02	46.25	1		1.07	27.5	1
sp|P32626|ENOPH_YEAST	2.08	16.74	1		5.44	34.36	4		7.03	35.2	5
sp|Q12408|NPC2_YEAST	2.08	21.39	2		8.55	61.27	5		9.31	44.5	6
sp|Q03281|HEH2_YEAST	2.07	25.79	2		2	16.59	2		4.38	21.1	3
sp|P42945|UTP10_YEAST	2.07	14.36	1		1.37	10.06	1		2.02	14.5	1
sp|P50101|UBP15_YEAST	2.06	18.7	2		6.02	20	3		3.4	24.4	3
sp|P32864|RAEP_YEAST	2.06	17.58	1		2.35	9.95	2		5.67	15.4	3
sp|P36135|UTH1_YEAST	2.06	16.44	2		6.9	26.85	5		2.25	12.6	4
sp|P54858|DOS2_YEAST	2.05	30.97	2		2	28.39	1		2.03	16.8	2
sp|P18962|DAP2_YEAST	2.05	6.846	1		6.19	28.12	4		6.02	18.1	3
sp|P45818|ROK1_YEAST	2.05	37.06	2		2.02	25	2		6.03	18.1	4
sp|Q06505|IWS1_YEAST	2.04	21.71	1		6.02	30.49	3		8.93	37.1	5
sp|Q12466|TCB1_YEAST	2.04	16.78	2		2.22	14.42	1		6.22	21.2	5
sp|P38339|RGD1_YEAST	2.04	23.27	2		2.03	16.37	1		2.01	16.5	1
sp|Q6Q546|HUB1_YEAST	2.04	56.16	3		3.03	28.77	3		4	39.7	3
sp|Q04603|DPB4_YEAST	2.04	22.45	1		4.52	45.41	3		5.6	42.4	4
sp|Q07648|DTD_YEAST	2.03	18.67	2		2.01	10	1		3.01	31.3	2
sp|P35845|OSH1_YEAST	2.03	13.72	1		3.22	12.37	2		1.62	13.4	2
sp|P38922|HRB1_YEAST	2.03	38.11	2		2	35.24	2		2.01	26.4	1
sp|P53925|YNL5_YEAST	2.03	14.91	1		7.01	36.02	4		8	25.2	6
sp|Q02776|TIM50_YEAST	2.03	19.75	1		11.52	32.98	8		8.95	21.6	6
sp|P18759|SEC18_YEAST	2.03	7.916	1		3.29	29.16	3		8.97	29.3	6
sp|P33204|ARPC4_YEAST	2.03	34.5	1		2.58	22.81	2		6.12	33.3	3
sp|P43639|CSK2B_YEAST	2.03	15.83	1		2	6.835	1		4.02	17.6	2
sp|P04449|RL24A_YEAST	2.02	32.26	5		4	36.77	8		3.92	31.6	8
sp|P39538|UBP12_YEAST	2.02	23.68	1		2.12	24.88	1		2.04	20.2	2
sp|Q12113|YO21B_YEAST	2.02	12.94	1		0	18.31	4		2.01	22.4	5
sp|P38811|TRA1_YEAST	2.02	21.39	1		2.28	14.85	2		2.35	10.8	2
sp|Q04585|YDR09_YEAST	2.02	19.86	1		4.01	19.72	2		4.01	23.1	2
sp|P47077|NOP9_YEAST	2.02	18.02	1		1.44	14.41	1		1.54	22.1	2
sp|P33334|PRP8_YEAST	2.02	14.84	1		2.02	12.47	1		2.01	10.6	1
sp|P32604|F26_YEAST	2.02	34.07	1		2.02	30.97	1		4.01	21.5	2
sp|P53331|REXO1_YEAST	2.02	26.76	1		2.22	31.1	2		2.03	20.4	2
sp|Q03362|YD476_YEAST	2.02	15.63	1		2	25.89	1		2	31.3	1
sp|Q12745|SEC39_YEAST	2.02	13.96	1		4	15.51	2		6.01	19	3
sp|Q12400|TRM10_YEAST	2.02	27.65	1		2.03	22.53	1		2.02	18.8	1
sp|P53919|NAF1_YEAST	2.02	21.75	1		2	14.43	1		2	15.2	1
sp|P38920|MLH1_YEAST	2.02	7.672	1		2	14.04	1		2.04	19.9	1
sp|Q12284|ERV2_YEAST	2.02	46.43	1		2	6.633	1		2.01	17.4	1
sp|P38985|SRP14_YEAST	2.02	24.66	1		2.27	50	2		2	11	1
sp|P32642|GLRX4_YEAST	2.01	27.46	3		2	34.84	4		4.25	29.5	5
sp|P46985|MNN11_YEAST	2.01	35.31	2		2	16.35	1		2.1	22	2
sp|P37254|PABS_YEAST	2.01	16.65	2		2.02	13.72	2		4.05	16	3
sp|P25847|MSH2_YEAST	2.01	16.7	1		2.05	18.46	1		4.04	19	2
sp|P36148|GPT2_YEAST	2.01	18.57	1		4.02	25.71	2		4.01	18.3	2
sp|Q06096|COG4_YEAST	2.01	20.21	1		2.05	14.29	1		3.83	13.4	2
sp|P38809|YHP7_YEAST	2.01	25.68	1		2.01	42.9	1		1.53	39.3	1
sp|P40012|PPOX_YEAST	2.01	20.78	1		4.01	28.94	2		2.01	8.9	1
sp|P42826|XKS1_YEAST	2.01	20.17	1		4.8	26	4		3.47	25.8	4
sp|Q04119|PPN1_YEAST	2.01	9.347	1		2	17.8	1		1.26	14.1	1
sp|P43612|SA155_YEAST	2.01	11.68	1		4.01	17.76	2		10.05	18.7	6
sp|Q07623|NOP6_YEAST	2.01	35.11	1		2.04	53.33	1		2	20.4	1
sp|P36000|AP1B1_YEAST	2.01	9.504	1		2.02	17.22	1		4.01	17.9	2
sp|P38882|UTP9_YEAST	2.01	41.22	1		4.21	21.74	2		2.07	26.4	1
sp|P40467|ASG1_YEAST	2.01	18.98	1		4.03	19.92	2		3.84	15.9	2
sp|P53914|KRE33_YEAST	2.01	19.22	1		4.31	24.91	2		6.01	26.5	4
sp|P34072|MKS1_YEAST	2.01	28.6	1		2	10.27	1		2.02	13.2	1
sp|Q06839|YP097_YEAST	2.01	19.57	1		2.05	20.6	1		4.04	20.9	3
sp|P34220|YBF5_YEAST	2.01	31.58	1		4.09	43.06	4		1.67	13.2	3
sp|Q03088|SVL3_YEAST	2.01	13.58	1		2.09	27.03	4		2.63	20	3
sp|Q08732|HRK1_YEAST	2.01	11.99	1		2	20.16	1		2.52	20.4	2
sp|P47122|NPA3_YEAST	2.01	27.79	1		6	20.78	4		4.53	22.1	4
sp|P53438|SOK2_YEAST	2.01	10.7	1		2.12	8.662	1		2.01	6.1	1
sp|P47154|STE24_YEAST	2.01	13.02	1		4.03	25.83	3		2.54	19.4	2
sp|P38629|RFC3_YEAST	2.01	10.59	1		2.07	21.47	1		3.13	26.8	2
sp|Q08492|BUD21_YEAST	2.01	27.57	1		4	37.38	2		4	17.3	2
sp|P40499|ICE2_YEAST	2.01	7.536	1		3.31	9.776	2		2	13.4	1
sp|Q04660|ERB1_YEAST	2.01	23.92	1		8.03	17.1	5		6.04	20.1	3
sp|P40957|MAD1_YEAST	2.01	24.7	1		2.02	16.29	1		2.01	25.4	1
sp|Q07825|FRA1_YEAST	2.01	20.29	1		2	15.22	1		4.35	30.8	3
sp|Q02785|PDR12_YEAST	2.01	9.861	1		4.06	17.47	2		2	10.9	1
sp|Q00711|DHSA_YEAST	2.01	24.06	1		6.16	23.75	3		7.74	30.8	4
sp|P38753|HSE1_YEAST	2.01	43.36	1		2.81	30.97	3		2.23	25.4	2
sp|Q05785|ENT2_YEAST	2.01	17.13	1		2.01	19.74	1		2.01	11.3	1
sp|Q08224|THI20_YEAST	2.01	25.59	1		1.27	26.86	1		2	34.1	1
sp|P25374|NFS1_YEAST	2.01	24.14	1		9.11	23.14	5		2.02	12.9	1
sp|P17157|PHO85_YEAST	2.01	30.16	2		6.38	41.64	4		8	37.1	4
sp|Q12404|MPD1_YEAST	2.01	28.93	1		2.23	39.62	1		5.83	40.3	3
sp|Q03322|TLG1_YEAST	2.01	33.04	1		2	15.63	1		2	27.7	1
sp|P32783|MCES_YEAST	2.01	17.43	1		6.89	30.05	4		2.05	18.8	1
sp|P53879|RHO5_YEAST	2.01	20.85	1		2.36	27.19	2		2.01	14.8	1
sp|P38875|GPI16_YEAST	2.01	14.43	1		3.85	16.56	2		4	11.2	2
sp|P53130|GPG1_YEAST	2.01	45.24	1		4	38.1	2		4.01	46.8	2
sp|P41814|TRM6_YEAST	2.01	13.6	1		2.01	7.95	1		4.07	16.3	3
sp|Q08689|NAT5_YEAST	2.01	26.14	1		6	48.86	3		5.32	32.4	3
sp|P53290|GTR2_YEAST	2.01	14.37	1		2	9.971	1		2	21.4	1
sp|P52917|VPS4_YEAST	2.01	10.07	1		5.12	34.55	5		6.02	40.7	4
sp|P47124|HOC1_YEAST	2.01	14.14	3		3.23	7.828	2		2	10.6	1
sp|P25045|LCB1_YEAST	2.01	12.54	1		6.99	23.12	5		4.63	14	3
sp|Q06485|ATG33_YEAST	2.01	25.38	1		2.18	46.7	2		2.01	17.8	2
sp|P46964|OST2_YEAST	2.01	31.54	1		2	22.31	1		2	13.1	1
tr|Q87024|Q87024_SCVLA	2	45.44	26		45.29	58.09	34		2	50.7	26
sp|O13516|RS9A_YEAST	2	63.45	19		2.1	54.31	21		2	53.8	20
sp|P40989|FKS2_YEAST	2	22.69	14		4	18.63	9		2.02	21.1	20
sp|P05738|RL9A_YEAST	2	66.49	19		25.1	73.82	24		2	67.5	15
sp|P38697|IMDH2_YEAST	2	34.8	13		6.02	51.63	19		4.03	52.8	21
sp|P05743|RL26A_YEAST	2	48.82	17		0.03	51.18	13		9.3	38.6	12
sp|P0C0V8|RS21A_YEAST	2	60.92	12		2	79.31	20		2	60.9	22
sp|P38816|TRXB2_YEAST	2	34.8	6		4	40.35	12		2	33.6	10
sp|P23595|PP2A2_YEAST	2	36.07	6		4.01	59.42	12		14.69	55.4	11
sp|Q12117|MRH1_YEAST	2	12.81	3		4	9.687	3		2	14.7	3
sp|Q12149|RRP6_YEAST	2	23.47	2		6.03	29.06	3		4.14	12.1	3
sp|P07807|DYR_YEAST	2	48.34	2		4.01	23.22	2		4	16.1	2
sp|P38828|LSM12_YEAST	2	22.46	2		2.02	24.6	1		2	21.9	2
sp|P32914|SPT4_YEAST	2	18.63	2		2	18.63	1		2	18.6	1
sp|Q12438|GLRX6_YEAST	2	24.24	1		4	13.85	2		4.01	19.9	2
sp|P04051|RPC1_YEAST	2	14.11	1		2.04	20.14	1		6.01	17.5	3
sp|P53091|MCM6_YEAST	2	20.75	1		4.02	13.96	2		4.03	11.8	2
sp|P35817|BDF1_YEAST	2	34.4	2		4.01	21.28	2		2.82	23.5	2
sp|P32806|GYP6_YEAST	2	21.4	1		1.1	18.12	1		3.57	22.3	2
sp|Q05931|HSP7Q_YEAST	2	23.14	1		3.36	27.55	2		4.45	35.6	3
sp|P47102|GEA1_YEAST	2	13.92	1		2.64	10.37	2		2.07	8.4	3
sp|P25655|NOT1_YEAST	2	14.61	1		2.13	10.82	3		4.01	12.4	2
sp|P41895|T2FA_YEAST	2	23.54	1		6.1	26.12	3		2	22.3	1
sp|P47048|YJE9_YEAST	2	21.33	1		1.11	22	1		0.79	9.3	1
sp|Q04847|ROY1_YEAST	2	13.92	1		4.02	24.59	2		2.01	15.2	1
sp|P50087|MOS2_YEAST	2	20.17	1		2.3	49.36	2		2.59	38.2	3
sp|Q07824|TPO1_YEAST	2	8.362	2		2	3.754	1		2	5.3	1
sp|P39526|LAA1_YEAST	2	8.342	2		2.01	12.02	1		2.21	14.7	2
sp|P53313|SDA1_YEAST	2	13.69	1		2.01	13.3	1		2.01	7.3	1
sp|Q00618|PGTA_YEAST	2	18.04	1		2.04	30.58	1		4.02	37	2
sp|P53121|FLC3_YEAST	2	10.1	1		2	7.606	1		4.85	13.8	3
sp|P20433|RPB4_YEAST	2	25.79	1		4	22.62	2		6	42.1	3
sp|P41543|OST1_YEAST	2	20.59	1		2.01	22.27	2		4.01	33.4	2
sp|P47166|SGM1_YEAST	2	18.67	1		4.13	21.64	2		2.13	21.1	1
sp|P36090|YKE7_YEAST	2	22.29	1		2.02	22.48	1		2.02	15.7	1
sp|Q04533|METX_YEAST	2	13.87	1		2.02	13.1	1		2	20.2	1
sp|P47164|MET7_YEAST	2	18.15	1		6.02	27.7	3		6	16.1	3
sp|P39965|SYPM_YEAST	2	12.85	1		1.89	19.79	1		2.06	12.7	1
sp|P33309|DOM34_YEAST	2	27.98	1		4.01	23.58	2		2	19.4	1
sp|P32264|PROB_YEAST	2	29.91	1		2	13.79	1		0.23	17.5	2
sp|P14747|PP2B2_YEAST	2	21.19	1		6.87	22.52	4		2.8	22.5	2
sp|P39006|PSD1_YEAST	2	16	1		5.39	20.4	3		2.09	19.8	2
sp|Q02933|RNY1_YEAST	2	26.73	1		2	9.908	1		6	12.2	3
sp|Q02486|ABF2_YEAST	2	24.59	1		6.39	45.9	5		2.37	44.8	2
sp|P48362|HGH1_YEAST	2	30.96	1		10.35	41.12	7		8.69	38.6	5
sp|P40350|ALG5_YEAST	2	23.95	1		2	16.77	1		2	13.8	1
sp|Q12373|HIF1_YEAST	2	15.84	1		4.01	19.74	2		5.28	24.7	3
sp|Q08726|GPN2_YEAST	2	24.78	1		2	10.95	1		2.1	13.8	2
sp|P40107|GMT1_YEAST	2	8.902	1		2	7.418	1		2	5.9	1
sp|P40081|MGDP1_YEAST	2	24.72	3		2	27.53	1		4.05	47.8	5
sp|P38996|NAB3_YEAST	2	5.237	1		2.05	17.83	2		4.49	21.1	3
sp|P38792|RRP4_YEAST	2	11.42	1		4.01	37.88	2		2.03	20.9	2
sp|Q12288|YL126_YEAST	2	14.34	1		8.33	36.25	5		6.07	32.3	4
sp|Q05533|INM2_YEAST	2	14.73	2		4	13.01	3		2	15.8	2
sp|P47064|AP3S_YEAST	2	19.07	1		2	19.07	2		2	13.9	1
sp|P29029|CHIT_YEAST	2	5.872	1		4	5.872	2		2	5.2	1
sp|P53281|LSB1_YEAST	2	11.2	1		3.17	25.31	3		3.13	17	3
sp|P53173|ERV14_YEAST	2	14.49	1		2	10.87	1		2	8	1
sp|P43682|SFT1_YEAST	2	54.64	1		2	61.86	1		2	61.9	1
sp|P39952|OXA1_YEAST	2	8.209	1		2	13.18	1		2	11.9	1
sp|P48415|SEC16_YEAST	2	10.02	2		5.72	17.08	5		4.69	20.3	5
sp|Q06218|DBP9_YEAST	2	21.89	1		2.02	17.85	1		4.01	16.8	2
sp|Q99257|MEX67_YEAST	2	22.04	1		2.18	30.38	2		8.04	26	4
sp|P08018|PBS2_YEAST	2	29.49	1		2.01	20.21	1		2.02	22.5	1
sp|P53295|RBG2_YEAST	2	25	1		8.52	31.25	5		4.2	26.9	3
sp|P53040|TAF6_YEAST	2	23.06	1		1.89	8.915	1		0.76	19	1
sp|P40160|RIO2_YEAST	2	31.29	1		1.77	15.29	1		4.01	23.8	2
sp|P35734|ASK1_YEAST	2	41.44	1		2	32.19	1		2.01	10.3	1
sp|P29468|PAP_YEAST	2	19.37	1		2	14.61	1		2.22	23.4	2
sp|Q12504|RKM4_YEAST	2	17.61	1		2.01	12.75	2		2.01	22.1	1
sp|Q12124|MED2_YEAST	2	28.07	1		2	17.17	1		3.28	11.1	2
sp|Q04739|GAL83_YEAST	2	20.38	1		4	12.71	2		4.03	18.2	3
sp|P40161|RT106_YEAST	2	14.95	1		2	12.97	1		1.17	16.7	2
sp|P38992|SUR2_YEAST	2	22.92	2		2.01	8.596	1		2	12.3	2
sp|P36007|SRY1_YEAST	2	40.8	1		2	36.5	1		2	32.2	1
sp|Q04080|GPI17_YEAST	2	15.92	1		2	13.86	1		5.51	12	3
sp|P50085|PHB2_YEAST	2	18.71	1		2	19.03	1		4.14	41	2
sp|P47095|MTNB_YEAST	2	26.23	2		6.57	35.25	5		7.9	37.3	4
sp|P38736|GOSR1_YEAST	2	30.49	1		4	20.63	2		2	9.4	1
sp|P38342|TSC10_YEAST	2	19.69	1		6.53	29.69	4		4.43	30.9	3
sp|P32462|ERG24_YEAST	2	13.47	2		2.01	12.1	1		2	8.9	1
sp|P25566|MXR2_YEAST	2	40.48	1		2	8.333	1		2	25.6	1
sp|Q3E834|YOS1_YEAST	2	29.41	1		2	27.06	1		2	27.1	1
sp|Q12743|DFM1_YEAST	2	24.63	1		2	15.84	1		3.2	19.7	2
sp|Q08816|YO352_YEAST	2	13.12	1		2.22	12.54	2		0.74	15.2	1
sp|Q04969|SPC2_YEAST	2	20.22	1		2	9.551	1		2.01	17.4	1
sp|Q04179|URH1_YEAST	2	15.88	1		2	21.76	1		2.01	20.9	1
sp|P47142|VPS25_YEAST	2	32.67	1		2	22.77	1		2	12.9	1
sp|P38276|YBY7_YEAST	2	31.84	1		8.64	51.96	5		6	19	4
sp|P38143|GPX2_YEAST	2	28.4	1		4.87	39.51	4		4	50	3
sp|P34240|ZRT3_YEAST	2	8.946	1		2	15.71	1		2	4.6	1
sp|P32857|PTM1_YEAST	2	7.648	1		4	16.06	2		3.62	10.3	2
sp|P32452|PHA2_YEAST	2	17.07	1		4	14.37	2		2.01	19.5	1
sp|P25637|YIH1_YEAST	2	25.97	1		2	9.302	1		2	13.6	1
sp|P25604|STP22_YEAST	2	9.351	1		2	14.55	1		4	24.2	2
sp|P22108|APA2_YEAST	2	23.08	1		2	9.538	1		2.58	11.1	2
sp|Q99288|DET1_YEAST	2	5.689	1		4	25.15	2		4.01	24	2
sp|Q12522|IF6_YEAST	2	14.29	1		4	33.06	2		4	21.2	3
sp|Q08969|GRE1_YEAST	2	23.21	2		2	17.86	2		2	8.9	1
sp|Q03429|MZM1_YEAST	2	27.64	1		4	64.23	2		4	53.7	2
sp|Q03323|SDC1_YEAST	2	23.43	1		8	34.29	4		1.29	17.1	1
sp|P53183|YGD9_YEAST	2	16.09	1		6	38.79	5		6.6	32.2	4
sp|P39515|TIM17_YEAST	2	32.91	1		4	55.7	2		2	28.5	1
sp|P36068|SHE2_YEAST	2	19.11	1		8	30.08	4		8	32.1	4
sp|P32329|YPS1_YEAST	2	7.909	1		2	9.315	1		2	9.8	2
sp|P15367|SEC11_YEAST	2	28.14	1		1.7	12.57	1		3.77	44.3	2
sp|P07250|IPMK_YEAST	2	12.11	2		4.01	25.07	2		2.02	14.7	1
sp|P03872|REP2_YEAST	2	16.89	1		4.07	25	3		4	34.5	2
sp|Q3E7Z5|YI002_YEAST	2	37.68	1		4.66	60.87	3		4	85.5	2
sp|Q12489|YD012_YEAST	2	28.97	1		2	27.1	1		0.38	16.8	1
sp|Q12025|YD056_YEAST	2	11.71	2		1.78	32.2	1		2	8.3	1
sp|Q05636|RRP45_YEAST	2	8.852	1		6.7	18.03	4		4.95	21.6	3
sp|Q05015|FSH2_YEAST	2	11.66	1		4	24.66	2		4	15.7	2
sp|Q03786|GNTK_YEAST	2	28.5	1		2.04	36.27	1		2.01	31.6	1
sp|Q03630|BET5_YEAST	2	16.35	1		2	10.06	2		2	15.1	2
sp|Q02205|MEH1_YEAST	2	19.57	1		2	40.76	1		2	38	1
sp|P53337|ERV29_YEAST	2	7.742	1		4.01	18.39	2		2	11	2
sp|P53330|RT102_YEAST	2	16.56	1		2	43.31	1		2	37.6	2
sp|P50106|RPA14_YEAST	2	11.68	1		2	8.759	1		4	57.7	2
sp|P43587|YPI1_YEAST	2	17.42	1		2	11.61	1		2	29.7	1
sp|P40857|PHS1_YEAST	2	15.67	1		2	12.44	1		2	10.6	1
sp|P40006|IRC22_YEAST	2	12.44	1		6	41.33	4		2.49	16.4	3
sp|P39543|SOP4_YEAST	2	6.838	1		2.23	39.74	2		2	12	1
sp|P38355|YB8B_YEAST	2	5.152	1		2	4.215	1		4.01	9.4	2
sp|P36101|YKC7_YEAST	2	5.369	1		6	25.95	4		2.01	11.4	1
sp|P32561|RPD3_YEAST	2	8.545	1		1.04	9.007	2		2.03	14.6	1
sp|P25378|RHEB_YEAST	2	12.44	1		2.01	31.58	1		2.01	20.1	1
sp|P07143|CY1_YEAST	2	9.061	1		4	18.45	2		2	4.2	1
sp|Q06549|CDD_YEAST	2	12.68	1		2	28.17	1		2.14	38	2
sp|Q05827|HOR7_YEAST	2	22.03	1		2	67.8	2		2	66.1	3
sp|P53195|COG7_YEAST	2	4.659	1		2.01	17.56	1		2.01	17.2	1
sp|P53039|YIP1_YEAST	2	8.871	1		2	8.871	1		2	8.9	1
sp|P40554|URM1_YEAST	2	13.13	1		2	13.13	1		2	17.2	1
sp|P39724|AIM1_YEAST	2	9.322	1		0.91	21.19	1		1.66	28	1
sp|P38203|LSM2_YEAST	2	10.53	1		4	22.11	2		6	41.1	3
sp|P34232|MTR2_YEAST	2	9.239	1		2	19.02	2		2	19	3
sp|P32798|COT1_YEAST	2	3.417	1		2	6.378	1		2	6.2	1
sp|P32529|RPA12_YEAST	2	12	1		2	12	1		2	12	1
sp|P22139|RPAB5_YEAST	2	37.14	1		4	52.86	2		4	52.9	2
sp|P00854|ATP6_YEAST	2	6.564	1		2	8.494	1		2	19.7	2
sp|A5Z2X5|YP010_YEAST	2	22.22	1		2	22.22	1		2	34.7	1
sp|P11914|MPPA_YEAST	1.87	32.99	1		2.16	34.44	3		6.62	42.5	5
sp|P38862|ATG7_YEAST	1.86	20.16	1		1.58	16.51	1		0.69	14.8	1
sp|P53853|VPS75_YEAST	1.86	29.92	2		4	13.64	2		5.46	25.8	3
sp|Q99190|TSC13_YEAST	1.85	6.774	1		2	6.774	1		4.78	14.2	3
sp|P32478|HS150_YEAST	1.85	3.39	1		2	10.65	1		1.82	14	1
sp|Q06405|ATPK_YEAST	1.85	20.79	1		2.52	28.71	2		3.33	19.8	2
sp|Q12287|COX17_YEAST	1.82	27.54	1		2	18.84	1		2	30.4	1
sp|Q03778|RIFK_YEAST	1.77	42.66	1		2.11	28.44	1		3.92	15.6	2
sp|P32794|AFG2_YEAST	1.68	15	1		2.25	20.38	2		2.01	11.7	1
sp|P53316|YG5B_YEAST	1.68	20.49	1		0.39	15.36	1		0.28	12.8	1
sp|Q12462|PEX11_YEAST	1.68	5.508	1		1.89	10.59	1		1.12	26.7	1
sp|P47822|MED21_YEAST	1.57	29.29	1		1.77	7.857	1		2	25	1
sp|P40029|MSRA_YEAST	1.53	14.67	1		8.84	44.02	5		6	22.8	3
sp|P38775|YHK5_YEAST	1.51	28.75	2		6	20	3		2.06	25.7	1
sp|Q08446|SGT1_YEAST	1.44	16.46	1		1.4	16.71	1		2	20.5	1
sp|Q03264|NGL2_YEAST	1.43	26.02	2		3.5	36.7	2		1.86	28.9	2
sp|P53723|YN8B_YEAST	1.43	26.49	2		2.89	14.6	3		2.27	20.1	5

## Sheet: SWATH_library
Protein Name	Unused score	% coverage	No. of peptides
sp|P00925|ENO2_YEAST	357.58	98.63	1586
sp|P06169|PDC1_YEAST	262.81	96.27	1145
sp|P00359|G3P3_YEAST	248.26	100	1052
sp|P10591|HSP71_YEAST	191.7	92.21	508
sp|P32589|HSP7F_YEAST	143.13	89.18	292
sp|P14540|ALF_YEAST	116.8	91.36	235
sp|P00560|PGK_YEAST	114.96	91.35	248
sp|P18899|DDR48_YEAST	103.91	86.74	163
sp|P04806|HXKA_YEAST	103.36	88.25	354
sp|P47143|ADK_YEAST	101.88	95	277
sp|P00942|TPIS_YEAST	98.25	97.18	334
sp|Q07653|HBT1_YEAST	96.38	65.39	99
sp|P22943|HSP12_YEAST	93.59	94.5	287
sp|P0CS90|HSP77_YEAST	92.48	75.99	135
sp|P07267|CARP_YEAST	90.93	77.78	198
sp|P00950|PMG1_YEAST	90.16	91.09	306
sp|P32324|EF2_YEAST	90.06	77.55	74
sp|P00817|IPYR_YEAST	89.74	89.2	282
sp|P37302|APE3_YEAST	85.2	71.88	162
sp|Q03104|MSC1_YEAST	84.52	72.12	153
sp|P34216|EDE1_YEAST	84.41	50.25	67
sp|P34760|TSA1_YEAST	82.26	94.39	190
sp|P11986|INO1_YEAST	81.89	89.87	171
sp|P00445|SODC_YEAST	81.37	100	278
sp|Q04432|HSP31_YEAST	81	92.83	112
sp|P40150|HSP76_YEAST	80.56	72.1	120
sp|P00924|ENO1_YEAST	78.62	98.63	1282
sp|Q03558|OYE2_YEAST	77.85	81.25	180
sp|P00360|G3P1_YEAST	76.58	93.98	500
sp|P53852|SYC_YEAST	76.17	75.75	50
sp|P54115|ALDH6_YEAST	75.83	86.4	155
sp|P06115|CATT_YEAST	75.69	89.15	107
sp|P38715|GRE3_YEAST	75.23	88.69	104
sp|P22515|UBA1_YEAST	72.74	69.34	48
sp|P46367|ALDH4_YEAST	71.88	76.3	119
sp|P19414|ACON_YEAST	70.66	70.57	50
sp|P19358|METK2_YEAST	70.22	93.23	124
sp|P43593|UBP6_YEAST	69.78	85.57	49
sp|P28272|PYRD_YEAST	69.72	87.26	264
sp|P04147|PABP_YEAST	69.36	89.95	101
sp|P15992|HSP26_YEAST	68.99	86.45	158
sp|P06208|LEU1_YEAST	66.91	78.35	70
sp|P02994|EF1A_YEAST	66.75	72.71	141
sp|P34167|IF4B_YEAST	65.81	88.3	50
sp|P14832|CYPH_YEAST	65.14	99.38	362
sp|P22202|HSP74_YEAST	65.01	80.53	218
sp|P17505|MDHM_YEAST	64.47	83.53	137
sp|P17649|GABAT_YEAST	64.36	86.62	38
sp|Q08245|ZEO1_YEAST	64.18	79.65	147
sp|Q05016|YM71_YEAST	63.82	92.51	144
sp|P54114|ALDH3_YEAST	59.88	80.04	58
sp|P17536|TPM1_YEAST	59.31	91.96	197
sp|P39522|ILV3_YEAST	59.2	80.51	77
sp|P13663|DHAS_YEAST	58.67	81.92	80
sp|P19882|HSP60_YEAST	58.18	59.97	59
sp|P46655|SYEC_YEAST	58.13	70.76	38
sp|P17709|HXKG_YEAST	57.96	89.8	83
sp|P38791|DHYS_YEAST	57.18	79.84	63
sp|P04807|HXKB_YEAST	56.86	79.63	117
sp|P50095|IMDH3_YEAST	56.84	88.91	62
sp|Q05905|HRI1_YEAST	56	91.39	85
sp|P41277|GPP1_YEAST	55.59	90.8	126
sp|P32499|NUP2_YEAST	54.98	80.56	37
sp|P15019|TAL1_YEAST	54.92	71.64	63
sp|P43590|YFH6_YEAST	54.71	70.09	42
sp|P07170|KAD2_YEAST	54.48	81.98	156
sp|Q12118|SGT2_YEAST	54.37	95.38	62
sp|P32614|FRDS_YEAST	53.84	74.04	59
sp|P46680|AIP1_YEAST	53.56	73.17	43
sp|P14907|NSP1_YEAST	53.56	52.98	31
sp|P53912|YNN4_YEAST	53.4	82.45	114
sp|P15891|ABP1_YEAST	52.8	75.51	66
sp|P10081|IF4A_YEAST	52.69	88.35	92
sp|P39954|SAHH_YEAST	52.5	68.82	111
sp|P16547|OM45_YEAST	52.22	77.1	49
sp|Q07551|KAR_YEAST	52.18	94.55	64
sp|P32316|ACH1_YEAST	51.96	75.29	42
sp|P16649|TUP1_YEAST	51.9	63.11	37
sp|Q04894|ADH6_YEAST	51.77	84.72	65
sp|P29509|TRXB1_YEAST	51.65	89.34	131
sp|P32590|HSP79_YEAST	51.53	73.88	71
sp|P38616|YGP1_YEAST	51.24	50.56	105
sp|P14306|CPYI_YEAST	51.05	96.35	95
sp|P32449|AROG_YEAST	50.71	82.16	85
sp|P17255|VATA_YEAST	50.67	54.34	44
sp|P38707|SYNC_YEAST	50.43	54.33	35
sp|Q12122|HOSM_YEAST	50.41	70.23	64
sp|P14065|GCY1_YEAST	50.36	85.9	72
sp|P07257|QCR2_YEAST	50.07	80.71	46
sp|P53278|YG3A_YEAST	50.05	60.05	33
sp|P14904|AMPL_YEAST	49.89	74.32	63
sp|P49090|ASNS2_YEAST	49.55	72.9	40
sp|P00431|CCPR_YEAST	49.53	86.43	57
sp|P16474|GRP78_YEAST	49.12	51.17	51
sp|P41921|GSHR_YEAST	48.5	74.95	90
sp|P07264|LEUC_YEAST	48.34	56.87	38
sp|P47137|YJ66_YEAST	48.06	96.45	62
sp|P54838|DAK1_YEAST	47.56	76.03	46
sp|Q08220|GSHB_YEAST	46	73.32	35
sp|P34223|UBX1_YEAST	45.98	72.81	44
sp|P53839|GOR1_YEAST	45.47	89.43	56
sp|P15705|STI1_YEAST	45.37	82.34	30
sp|Q08977|YP260_YEAST	45.13	80.22	36
sp|P38115|ARA1_YEAST	45.07	90.7	103
sp|Q12363|WTM1_YEAST	45.01	73	60
sp|P06101|CDC37_YEAST	44.91	83	42
sp|Q03161|YMY9_YEAST	44.18	82.15	35
sp|P24521|ERG8_YEAST	43.94	73.39	25
sp|P53303|ZPR1_YEAST	43.52	70.37	28
sp|P41920|YRB1_YEAST	43.44	81.59	64
sp|P20051|PYRC_YEAST	43.28	72.8	38
sp|P14843|AROF_YEAST	42.68	71.62	80
sp|P39683|NPT1_YEAST	42.44	72.96	64
sp|P33734|HIS5_YEAST	42.13	81.16	29
sp|P22203|VATE_YEAST	42.01	90.13	46
sp|P29952|MPI_YEAST	41.5	80.65	43
sp|Q04728|ARGJ_YEAST	41.27	69.39	39
sp|P33315|TKT2_YEAST	41.12	61.82	26
sp|P47068|BBC1_YEAST	40.95	46.85	29
sp|P16120|THRC_YEAST	40.83	85.41	34
sp|Q05050|EIS1_YEAST	40.72	58.36	23
sp|P00498|HIS1_YEAST	40.69	81.14	49
sp|P41338|THIL_YEAST	40.67	65.33	38
sp|P38845|CRP1_YEAST	40.64	59.35	42
sp|P43597|YFI6_YEAST	40.57	59.12	23
sp|P32377|MVD1_YEAST	40.25	75.76	35
sp|P12709|G6PI_YEAST	39.95	70.76	53
sp|P10664|RL4A_YEAST	39.32	70.72	33
sp|P07256|QCR1_YEAST	39.2	86.87	38
sp|P39966|PP2C2_YEAST	39.16	63.58	33
sp|P53111|ARI1_YEAST	39.05	87.32	67
sp|P53691|PPID_YEAST	39	82.21	72
sp|P36060|MCR1_YEAST	38.93	72.85	40
sp|Q06625|GDE_YEAST	38.56	38.67	21
sp|P04840|VDAC1_YEAST	37.83	85.16	38
sp|Q07505|DLHH_YEAST	37.67	77.66	43
sp|P46672|G4P1_YEAST	37.09	78.72	45
sp|P53598|SUCA_YEAST	37.07	87.54	41
sp|P40414|TPM2_YEAST	36.97	93.79	54
sp|P00890|CISY1_YEAST	36.52	69.73	26
sp|P32288|GLNA_YEAST	36.36	67.57	48
sp|Q12068|GRE2_YEAST	36.1	74.27	36
sp|P54885|PROA_YEAST	36.07	54.17	30
sp|Q12008|PMG2_YEAST	35.87	82.32	25
sp|P41818|GLC8_YEAST	35.87	89.08	27
sp|P21243|PSA1_YEAST	35.79	89.68	32
sp|P23776|EXG1_YEAST	35.78	64.96	61
sp|P48510|DSK2_YEAST	35.54	61.66	37
sp|P09232|PRTB_YEAST	35.44	42.05	45
sp|Q08412|CUE5_YEAST	35.43	76.64	32
sp|Q12305|RDL1_YEAST	35.21	94.24	78
sp|P0CT04|IPB2_YEAST	35.09	93.33	64
sp|P53184|PNC1_YEAST	35.08	77.31	73
sp|P17891|CLC1_YEAST	34.66	68.24	29
sp|P28777|AROC_YEAST	34.53	64.89	21
sp|P15454|KGUA_YEAST	34.23	91.44	55
sp|P10592|HSP72_YEAST	34.16	88.73	428
sp|Q99258|RIB3_YEAST	33.66	84.62	63
sp|P36047|SDS22_YEAST	33.54	83.43	25
sp|P31787|ACBP_YEAST	33.5	97.7	156
sp|Q04947|RTN1_YEAST	33.39	55.25	34
sp|P35176|CYPD_YEAST	32.98	90.67	83
sp|Q05584|GLO2_YEAST	32.96	81.02	30
sp|P38013|AHP1_YEAST	32.93	96.02	65
sp|P36139|PET10_YEAST	32.71	61.48	21
sp|P48836|VATG_YEAST	32.38	75.44	50
sp|P23201|SPA2_YEAST	32.22	53.07	19
sp|Q12447|PAA1_YEAST	31.95	89.01	29
sp|P40563|AIM21_YEAST	31.92	54.79	18
sp|Q12230|LSP1_YEAST	31.63	60.7	23
sp|P33442|RS3A1_YEAST	31.33	76.86	25
sp|P53141|MLC1_YEAST	31.15	85.91	32
sp|Q12044|RCN2_YEAST	31.14	93.96	22
sp|P38069|MNN2_YEAST	31.1	58.12	19
sp|P35844|KES1_YEAST	31	55.07	24
sp|P36016|LHS1_YEAST	30.93	51.08	17
sp|P38788|SSZ1_YEAST	30.67	62.64	21
sp|Q12458|YPR1_YEAST	30.64	91.35	58
sp|P22146|GAS1_YEAST	30.58	41.32	48
sp|P39721|AIM2_YEAST	30.26	88.21	46
sp|P38197|YBD6_YEAST	30.1	74.71	23
sp|P37291|GLYC_YEAST	29.98	75.69	18
sp|Q04304|YMY0_YEAST	29.95	69.6	31
sp|P34730|BMH2_YEAST	29.67	66.3	38
sp|P32477|GSH1_YEAST	29.56	60.18	18
sp|P05759|RS27A_YEAST	29.4	66.45	83
sp|P32471|EF1B_YEAST	29.31	68.93	124
sp|P38623|RCK2_YEAST	29.08	49.02	18
sp|P22217|TRX1_YEAST	29.04	100	78
sp|P32521|PAN1_YEAST	28.86	30.34	19
sp|P40302|PSA6_YEAST	28.85	89.32	24
sp|P36136|SHB17_YEAST	28.47	76.75	38
sp|P05750|RS3_YEAST	28.41	71.25	23
sp|Q12434|GDIR_YEAST	28.4	74.75	22
sp|P19881|PNPP_YEAST	28.36	66.03	21
sp|P21242|PSA7_YEAST	28.17	73.26	24
sp|P17106|CBF1_YEAST	28.16	54.42	20
sp|P25087|ERG6_YEAST	28.07	66.84	17
sp|P35732|DEF1_YEAST	28.06	30.62	17
sp|P38075|PDX3_YEAST	28.02	76.32	31
sp|Q99312|ISN1_YEAST	28.01	56.89	20
sp|P32379|PSA5_YEAST	28	85	23
sp|P01120|RAS2_YEAST	27.89	88.2	30
sp|P38853|KEL1_YEAST	27.8	51.37	17
sp|P06787|CALM_YEAST	27.71	99.32	49
sp|Q06146|YL257_YEAST	27.68	68.85	35
sp|Q04178|HPRT_YEAST	27.62	78.73	15
sp|P38891|BCA1_YEAST	27.59	68.45	16
sp|P40093|YEY6_YEAST	27.56	74.85	19
sp|P35719|MRP8_YEAST	27.47	83.56	25
sp|P0CX73|YP11A_YEAST	27.32	52.95	31
sp|P42826|XKS1_YEAST	27.18	44.83	17
sp|P18562|UPP_YEAST	27.18	85.65	36
sp|P05150|OTC_YEAST	27.15	70.71	31
sp|Q08601|MCA1_YEAST	27.08	51.16	33
sp|P38817|GGA2_YEAST	26.92	52.14	17
sp|P29453|RL8B_YEAST	26.92	74.22	28
sp|Q86ZR7|YKD3A_YEAST	26.7	82.63	23
sp|Q12213|RL7B_YEAST	26.65	65.98	25
sp|P50861|RIB4_YEAST	26.52	84.02	101
sp|P36046|MIA40_YEAST	26.35	59.06	23
sp|Q06252|YL179_YEAST	26.26	79.6	49
sp|P38260|FES1_YEAST	26.24	70.69	16
sp|P10659|METK1_YEAST	26.15	82.2	66
sp|P23301|IF5A1_YEAST	26.13	85.35	29
sp|P17695|GLRX2_YEAST	26.09	71.33	65
sp|P25332|RBSK_YEAST	26.08	53.45	22
sp|P32861|UGPA1_YEAST	26.05	54.31	14
sp|P00729|CBPY_YEAST	26.01	48.12	27
sp|P40531|GVP36_YEAST	26	49.08	20
sp|Q05785|ENT2_YEAST	25.99	39.15	16
sp|P17967|PDI_YEAST	25.99	40.23	19
sp|P32566|SMI1_YEAST	25.92	62.18	24
sp|P47120|DOHH_YEAST	25.74	76.31	15
sp|Q08199|SIL1_YEAST	25.69	58.67	15
sp|P53332|COAD_YEAST	25.51	73.11	14
sp|P00330|ADH1_YEAST	25.48	64.08	19
sp|P40303|PSA4_YEAST	25.41	74.41	18
sp|P32598|PP12_YEAST	25.32	83.97	30
sp|P40054|SERA_YEAST	25.31	52.03	17
sp|Q12032|AIM41_YEAST	25.28	65.95	15
sp|P48606|TBCA_YEAST	25.28	86.79	24
sp|P40185|MMF1_YEAST	25.17	88.97	79
sp|P42938|TDA10_YEAST	25.01	84.48	15
sp|P40106|GPP2_YEAST	24.99	91.2	80
sp|P22108|APA2_YEAST	24.95	76.62	13
sp|P35197|GCS1_YEAST	24.69	54.83	17
sp|P38009|PUR92_YEAST	24.63	60.81	14
sp|P20081|FKBP_YEAST	24.6	94.74	94
sp|Q05979|KYNU_YEAST	24.59	60.49	19
sp|P23638|PSA3_YEAST	24.57	67.05	15
sp|P08417|FUMH_YEAST	24.46	52.66	19
sp|P31116|DHOM_YEAST	24.44	75.49	18
sp|Q08641|AB140_YEAST	24.37	44.27	19
sp|P38879|NACA_YEAST	24.37	77.01	37
sp|P00549|KPYK1_YEAST	24.33	60.6	15
sp|P12904|AAKG_YEAST	24.26	66.46	17
sp|P33399|LHP1_YEAST	24.21	80.73	18
sp|P54783|ALO_YEAST	24.17	46.77	13
sp|P53196|RPN14_YEAST	24.02	54.92	13
sp|P14126|RL3_YEAST	24.01	58.91	22
sp|P53334|SCW4_YEAST	24.01	59.33	27
sp|P15703|BGL2_YEAST	24.01	50.48	35
sp|P36059|NNRD_YEAST	23.6	51.04	15
sp|P32860|NFU1_YEAST	23.58	80.86	13
sp|P25373|GLRX1_YEAST	23.52	83.64	57
sp|P32486|KRE6_YEAST	23.42	43.33	15
sp|P31539|HS104_YEAST	23.41	48.57	17
sp|P11491|PPB_YEAST	23.36	52.12	14
sp|P38858|SOL3_YEAST	23.36	86.35	21
sp|P13298|PYRE_YEAST	23.3	72.57	17
sp|P52911|EXG2_YEAST	23.17	46.44	18
sp|P25719|CYPC_YEAST	22.93	81.87	61
sp|P40159|YNU8_YEAST	22.79	86.93	47
sp|Q01532|BLH1_YEAST	22.71	59.63	18
sp|Q12189|RPIA_YEAST	22.7	78.68	16
sp|P09457|ATPO_YEAST	22.64	66.04	23
sp|Q12427|STB3_YEAST	22.63	41.91	14
sp|P15180|SYKC_YEAST	22.5	46.02	14
sp|P38755|OSH7_YEAST	22.48	66.59	13
sp|Q03655|GAS3_YEAST	22.31	51.15	16
sp|Q12497|FMP16_YEAST	22.12	70.97	31
sp|P36015|YKT6_YEAST	22.11	80	16
sp|P37370|VRP1_YEAST	22.09	31.58	12
sp|P38145|RISA_YEAST	22.09	61.76	18
sp|P22803|TRX2_YEAST	22.04	85.58	85
sp|P40581|GPX3_YEAST	22.01	63.19	35
sp|P50278|SOL1_YEAST	22	60.12	13
sp|P06782|SNF1_YEAST	21.92	44.23	11
sp|P07278|KAPR_YEAST	21.89	73.32	11
sp|P15496|IDI1_YEAST	21.84	80.21	13
sp|P40075|SCS2_YEAST	21.83	48.36	24
sp|P47044|YJF5_YEAST	21.67	66.94	25
sp|P15873|PCNA_YEAST	21.57	75.58	15
sp|P38281|APD1_YEAST	21.57	73.73	14
sp|Q03629|YMH9_YEAST	21.52	80.6	22
sp|P38067|UGA2_YEAST	21.48	51.71	19
sp|P40212|RL13B_YEAST	21.3	54.77	15
sp|P23639|PSA2_YEAST	21.24	53.2	17
sp|Q01976|ADPP_YEAST	21.14	56.71	49
sp|P07262|DHE4_YEAST	20.97	58.15	13
sp|P26783|RS5_YEAST	20.95	66.67	21
sp|P30657|PSB7_YEAST	20.91	79.7	14
sp|P11938|RAP1_YEAST	20.84	41.96	13
sp|P21538|REB1_YEAST	20.74	51.48	12
sp|P38071|ETR1_YEAST	20.72	52.37	19
sp|Q05902|ECM38_YEAST	20.69	45.3	11
sp|P46989|ATG27_YEAST	20.5	52.03	11
sp|P40517|YRB2_YEAST	20.49	64.53	11
sp|P32628|RAD23_YEAST	20.41	37.94	15
sp|P25623|SYP1_YEAST	20.35	47.7	11
sp|P26321|RL5_YEAST	20.35	75.42	25
sp|P0CX36|RS4B_YEAST	20.28	61.69	19
sp|P42222|ERR3_YEAST	20.21	75.29	26
sp|P00358|G3P2_YEAST	20.19	97.59	619
sp|P30656|PSB5_YEAST	20.15	83.28	12
sp|P0CX81|MTCU2_YEAST	20.12	77.05	85
sp|P41805|RL10_YEAST	20.03	70.14	19
sp|P32588|PUB1_YEAST	20	54.97	15
sp|P51996|YPT32_YEAST	19.88	52.7	12
sp|P25443|RS2_YEAST	19.88	49.21	17
sp|Q12511|PDP1_YEAST	19.84	55.24	11
sp|P53885|MDG1_YEAST	19.82	31.69	12
sp|Q05788|PNPH_YEAST	19.8	76.85	11
sp|P28707|SBA1_YEAST	19.77	54.17	24
sp|P14922|CYC8_YEAST	19.75	31.78	21
sp|P38109|YBY9_YEAST	19.67	38.78	15
sp|Q07716|AIM6_YEAST	19.64	74.1	14
sp|P32602|SEC17_YEAST	19.6	55.48	15
sp|P38682|GLO3_YEAST	19.42	30.02	14
sp|P05694|METE_YEAST	19.33	46.68	11
sp|P38993|FET3_YEAST	19.3	35.38	12
sp|P0CX48|RS11B_YEAST	19.19	51.28	14
sp|P05755|RS9B_YEAST	19.14	47.69	16
sp|P47103|CYP7_YEAST	19.01	51.15	11
sp|Q02326|RL6A_YEAST	19	56.82	13
sp|Q04120|TSA2_YEAST	18.97	79.08	25
sp|P46683|YAR1_YEAST	18.9	84	18
sp|P16603|NCPR_YEAST	18.85	41.68	13
sp|Q04493|PFD5_YEAST	18.8	69.94	18
sp|P25349|YCP4_YEAST	18.54	63.97	12
sp|Q12114|CHS5_YEAST	18.52	45.75	11
sp|P34227|PRX1_YEAST	18.51	52.87	11
sp|Q08647|PUS7_YEAST	18.48	51.18	10
sp|P40202|CCS1_YEAST	18.43	74.7	21
sp|P43577|GNA1_YEAST	18.35	83.65	18
sp|P50094|IMDH4_YEAST	18.3	66.6	39
sp|Q12288|YL126_YEAST	18.23	84.06	13
sp|P38841|YHT8_YEAST	18.2	73.68	12
sp|P38427|TSL1_YEAST	18.11	33.7	22
sp|P47160|ENT3_YEAST	18.07	40.44	14
sp|Q12109|SYWC_YEAST	18.04	43.29	9
sp|P38011|GBLP_YEAST	18.04	54.23	13
sp|P22141|PSB4_YEAST	18.01	60.1	15
sp|P53900|PFD4_YEAST	18	90.7	18
sp|P32472|FKBP2_YEAST	18	79.26	18
sp|P0CX56|RS18B_YEAST	18	64.38	19
sp|Q04951|SCW10_YEAST	18	30.85	14
sp|P02406|RL28_YEAST	17.92	63.76	11
sp|Q99321|DDP1_YEAST	17.76	85.11	15
sp|P38624|PSB1_YEAST	17.73	81.4	13
sp|Q04409|EMI2_YEAST	17.72	50.2	18
sp|P07991|OAT_YEAST	17.64	56.13	9
sp|P43638|MHP1_YEAST	17.6	34.62	10
sp|P10080|SSBP1_YEAST	17.51	88.1	22
sp|P0CX46|RL2B_YEAST	17.46	63.78	18
sp|P32481|IF2G_YEAST	17.38	47.06	10
sp|Q12335|PST2_YEAST	17.28	78.79	27
sp|P38523|GRPE_YEAST	17.23	83.33	25
sp|P22768|ASSY_YEAST	17.16	51.19	14
sp|P00427|COX6_YEAST	17.14	70.27	12
sp|P39958|GDI1_YEAST	17.07	64.97	10
sp|P24031|PPA3_YEAST	17.06	45.18	13
sp|P25040|TSR4_YEAST	16.95	50.74	9
sp|P38716|YHR2_YEAST	16.93	64.02	9
sp|P28321|MGLL_YEAST	16.8	59.11	10
sp|P40040|THO1_YEAST	16.79	74.31	12
sp|Q02046|MTD1_YEAST	16.72	60.62	13
sp|P11076|ARF1_YEAST	16.66	70.72	15
sp|P52286|SKP1_YEAST	16.52	69.07	15
sp|Q12314|YO021_YEAST	16.51	67.61	10
sp|P47165|XPT1_YEAST	16.51	64.11	10
sp|Q01560|NOP3_YEAST	16.49	40.82	12
sp|P08524|FPPS_YEAST	16.42	58.81	12
sp|P40029|MSRA_YEAST	16.38	75	12
sp|P38288|TOS1_YEAST	16.35	34.51	22
sp|P28239|IPYR2_YEAST	16.33	56.45	10
sp|Q3E841|YN034_YEAST	16.24	93.88	25
sp|P54113|PUR91_YEAST	16.2	69.2	15
sp|P52553|PFD6_YEAST	16.2	79.82	15
sp|Q07938|MTAP_YEAST	16.18	58.46	13
sp|P40357|SEC9_YEAST	16.12	37.63	9
sp|P39926|SSO2_YEAST	16.04	67.46	16
sp|P49089|ASNS1_YEAST	16.02	68.01	24
sp|Q99383|HRP1_YEAST	16.02	53.18	14
sp|P40582|GST1_YEAST	16.02	59.4	21
sp|P16965|STF2_YEAST	16.01	76.19	26
sp|P38804|SDO1L_YEAST	16	72.07	41
sp|Q02642|NACB1_YEAST	16	70.06	31
sp|P02400|RLA4_YEAST	15.96	98.18	18
sp|Q04410|GRH1_YEAST	15.94	39.25	9
sp|P53252|PIL1_YEAST	15.93	67.55	14
sp|P25294|SIS1_YEAST	15.83	40.06	9
sp|Q12443|RTN2_YEAST	15.78	36.39	10
sp|P00724|INV2_YEAST	15.77	36.09	8
sp|P25296|CANB_YEAST	15.73	77.14	12
sp|O43137|YB085_YEAST	15.72	87.06	23
sp|P38081|YBQ6_YEAST	15.68	43.31	9
sp|P37012|PGM2_YEAST	15.67	34.97	9
sp|P39101|CAJ1_YEAST	15.62	57.54	10
sp|Q02201|OSH6_YEAST	15.61	61.38	9
sp|P0CX38|RS6B_YEAST	15.6	61.86	9
sp|P21734|UBC1_YEAST	15.6	88.37	9
sp|Q04773|YMW4_YEAST	15.51	74.48	16
sp|P36069|PMU1_YEAST	15.48	57.29	10
sp|P48363|PFD3_YEAST	15.43	70.85	12
sp|P32643|TMT1_YEAST	15.23	64.21	8
sp|Q12306|SMT3_YEAST	15.23	79.21	39
sp|P53228|TAL2_YEAST	15.14	61.56	13
sp|P38131|KTR4_YEAST	15.1	44.61	8
sp|P27796|THIK_YEAST	15.05	67.87	9
sp|P39105|PLB1_YEAST	15.04	24.25	14
sp|P38934|BFR1_YEAST	14.97	44.47	10
sp|P38968|SEC31_YEAST	14.89	25.37	14
sp|P42940|ETFB_YEAST	14.82	52.11	9
sp|P57744|TIM8_YEAST	14.7	98.85	8
sp|P40081|MGDP1_YEAST	14.7	47.75	9
sp|P33336|SKN1_YEAST	14.67	25.94	10
sp|P43598|IGD1_YEAST	14.64	71.28	9
sp|P32911|SUI1_YEAST	14.62	72.22	15
sp|P32835|GSP1_YEAST	14.58	71.23	11
sp|Q12355|PST1_YEAST	14.46	34.91	11
sp|P38352|SAF1_YEAST	14.42	41.92	11
sp|P0CX85|RL35B_YEAST	14.4	66.67	11
sp|P06105|SC160_YEAST	14.39	39.69	7
sp|P38248|ECM33_YEAST	14.31	31.47	34
sp|P38720|6PGD1_YEAST	14.28	51.94	11
sp|P53164|NPY1_YEAST	14.21	62.24	8
sp|P0CX54|RL12B_YEAST	14.2	77.58	11
sp|P36017|VPS21_YEAST	14.19	55.24	9
sp|P25385|BOS1_YEAST	14.19	57.79	8
sp|Q12271|INP53_YEAST	14.17	38.3	10
sp|P27614|CBPS_YEAST	14.13	38.19	9
sp|P47096|3HAO_YEAST	14.09	87.01	13
sp|P30902|ATP7_YEAST	14.07	68.39	7
sp|P50107|LGUL_YEAST	14.04	57.06	12
sp|P40893|REE1_YEAST	14.04	73.74	10
sp|P07280|RS19A_YEAST	14.04	68.06	15
sp|P10869|AK_YEAST	14.03	36.62	7
sp|P46990|RL17B_YEAST	14.02	60.87	10
sp|P46654|RSSA2_YEAST	14.01	54.76	14
sp|Q03048|COFI_YEAST	14.01	79.72	25
sp|P40347|PPAL_YEAST	14.01	44.72	12
sp|P39015|STM1_YEAST	14	82.05	23
sp|P07560|SEC4_YEAST	14	81.86	9
sp|P39013|END3_YEAST	13.98	67.34	7
sp|P38701|RS20_YEAST	13.85	48.76	8
sp|P20459|IF2A_YEAST	13.84	61.51	7
sp|P06780|RHO1_YEAST	13.82	53.59	8
sp|P53066|YGZ2_YEAST	13.8	62.98	14
sp|Q08971|YP225_YEAST	13.73	97.26	8
sp|Q12480|ETFA_YEAST	13.7	43.31	7
sp|P32527|ZUO1_YEAST	13.67	44.11	11
sp|P14020|DPM1_YEAST	13.59	47.19	8
sp|P53301|CRH1_YEAST	13.55	38.86	9
sp|P26786|RS7A_YEAST	13.54	64.21	16
sp|P35189|TAF14_YEAST	13.48	51.23	10
sp|P40545|HIS4_YEAST	13.37	57.09	9
sp|P38972|PUR4_YEAST	13.36	37.11	8
sp|P53929|YNK8_YEAST	13.33	58.89	9
sp|P38910|CH10_YEAST	13.27	65.09	22
sp|P53152|MMS2_YEAST	13.26	78.83	9
sp|P53235|EIF2A_YEAST	13.24	45.02	8
sp|P04456|RL25_YEAST	13.23	47.18	11
sp|P39929|SNF7_YEAST	13.21	55	9
sp|P16521|EF3A_YEAST	13.17	29.21	10
sp|P04037|COX4_YEAST	13.16	78.71	10
sp|P20676|NUP1_YEAST	13.12	32.62	7
sp|P23724|PSB6_YEAST	13.12	63.07	16
sp|P28789|HEM3_YEAST	13.1	60.55	11
sp|P38998|LYS1_YEAST	13.1	54.69	8
sp|P14127|RS17B_YEAST	13.1	42.65	13
sp|Q12449|AHA1_YEAST	13.04	54	10
sp|Q12191|BUG1_YEAST	13.01	53.08	7
sp|P25451|PSB3_YEAST	13.01	49.76	13
sp|P0CX83|RL19B_YEAST	12.89	56.08	14
sp|P38758|TDA3_YEAST	12.86	40.73	9
sp|P06367|RS14A_YEAST	12.84	70.07	13
sp|P04076|ARLY_YEAST	12.82	50.32	8
sp|P20486|CKS1_YEAST	12.79	83.33	7
sp|O13297|CET1_YEAST	12.75	53.19	8
sp|Q00816|REG1_YEAST	12.71	41.42	9
sp|P39726|GCSH_YEAST	12.65	41.76	20
sp|P38765|YHI9_YEAST	12.58	37.07	7
sp|Q02772|PT191_YEAST	12.57	58.33	8
sp|Q08926|UIP4_YEAST	12.54	56.91	10
sp|P05756|RS13_YEAST	12.54	60.26	10
sp|P0CX24|RL20B_YEAST	12.52	54.07	9
sp|P38295|MCFS2_YEAST	12.45	57.65	9
sp|Q08193|GAS5_YEAST	12.45	29.75	17
sp|P0CX40|RS8B_YEAST	12.39	51.5	15
sp|P38074|HMT1_YEAST	12.35	47.13	7
sp|P07283|PMM_YEAST	12.34	69.29	9
sp|P38913|FAD1_YEAST	12.23	40.52	7
sp|Q08954|YP199_YEAST	12.2	39.58	7
sp|P40047|ALDH5_YEAST	12.19	28.46	11
sp|P30402|PYRX_YEAST	12.19	74.45	10
sp|O60200|MDM35_YEAST	12.1	79.07	9
sp|Q08581|SLK19_YEAST	12.08	54.69	8
sp|P47018|MTC1_YEAST	12.08	47.49	8
sp|P25369|LSB5_YEAST	12.08	45.48	6
sp|P07251|ATPA_YEAST	12.01	42.57	6
sp|Q12513|TMA17_YEAST	12.01	80.67	30
sp|Q03667|MIC17_YEAST	12.01	42.95	11
sp|P53897|IGO1_YEAST	12.01	54.17	8
sp|P51401|RL9B_YEAST	12	73.3	9
sp|Q12178|FCY1_YEAST	12	77.22	9
sp|P0C2H7|RL27B_YEAST	12	52.21	10
sp|P21306|ATP5E_YEAST	12	85.48	6
sp|P05030|PMA1_YEAST	11.96	27.02	8
sp|P40019|CHZ1_YEAST	11.96	69.28	10
sp|P40363|SFGH_YEAST	11.96	44.15	6
sp|Q08179|MDM38_YEAST	11.91	41.71	7
sp|P53849|GIS2_YEAST	11.88	60.13	31
sp|P26785|RL16B_YEAST	11.82	50	11
sp|P38836|ECM14_YEAST	11.77	24.65	8
sp|Q06406|LSM6_YEAST	11.74	84.88	8
sp|P53890|BNI5_YEAST	11.7	37.72	6
sp|P32179|MET22_YEAST	11.68	64.15	7
sp|P53221|RL26B_YEAST	11.67	57.48	11
sp|Q06608|PDXH_YEAST	11.67	80	7
sp|Q06440|CORO_YEAST	11.45	52.23	7
sp|P38066|RIB1_YEAST	11.44	50.72	7
sp|P38887|YH02_YEAST	11.41	21.93	7
sp|P28319|CWP1_YEAST	11.34	59	9
sp|Q3E7Y3|RS22B_YEAST	11.29	76.15	15
sp|P18239|ADT2_YEAST	11.14	70.44	7
sp|P25372|TRX3_YEAST	11.11	69.29	7
sp|Q04341|MIC14_YEAST	11.08	90.91	9
sp|P53044|UFD1_YEAST	11.07	55.96	8
sp|P40825|SYA_YEAST	11.05	46.59	7
sp|P38349|UBX7_YEAST	10.99	47.25	6
sp|P40553|DOT5_YEAST	10.99	58.14	8
sp|P05748|RL15A_YEAST	10.93	50	13
sp|P40037|HMF1_YEAST	10.88	57.36	7
sp|P05373|HEM2_YEAST	10.86	65.5	6
sp|P25043|PSB2_YEAST	10.86	47.89	9
sp|Q3E754|RS21B_YEAST	10.75	88.51	17
sp|P22336|RFA1_YEAST	10.73	37.04	6
sp|P11484|HSP75_YEAST	10.6	72.1	118
sp|P0CX52|RS16B_YEAST	10.54	78.32	8
sp|P48015|GCST_YEAST	10.5	46	7
sp|P23180|AIM17_YEAST	10.44	38.92	5
sp|P0CX32|RS24B_YEAST	10.43	47.41	9
sp|P34217|PIN4_YEAST	10.4	21.41	7
sp|P32582|CBS_YEAST	10.37	38.07	6
sp|O14467|MBF1_YEAST	10.33	53.64	8
sp|P36010|NDK_YEAST	10.28	69.28	6
sp|P07275|PUT2_YEAST	10.21	35.48	6
sp|Q12017|PLP2_YEAST	10.15	48.25	5
sp|P43582|WWM1_YEAST	10.13	44.08	10
sp|P49954|NIT3_YEAST	10.13	38.83	5
sp|P01119|RAS1_YEAST	10.09	61.17	12
sp|P53121|FLC3_YEAST	10.08	22.19	6
sp|Q12159|YRA1_YEAST	10.08	67.26	5
sp|P53879|RHO5_YEAST	10.08	55.29	7
sp|P12630|BAR1_YEAST	10.07	19.08	7
sp|P0CX44|RL1B_YEAST	10.06	53.92	5
sp|P43619|NADC_YEAST	10.04	38.64	6
sp|P24000|RL24B_YEAST	10.04	46.45	7
sp|P53210|YG1B_YEAST	10.02	37.04	8
sp|P32867|SSO1_YEAST	10	57.59	7
sp|P53859|CSL4_YEAST	10	46.23	5
sp|P23641|MPCP_YEAST	10	58.2	6
sp|P38203|LSM2_YEAST	10	86.32	5
sp|P40005|PFD2_YEAST	10	72.07	5
sp|O13547|CCW14_YEAST	10	38.66	13
sp|P32447|ASF1_YEAST	10	26.88	7
sp|P48589|RS12_YEAST	10	39.16	5
sp|P0C2H8|RL31A_YEAST	9.97	64.6	7
sp|Q12091|DAP1_YEAST	9.9	82.89	9
sp|Q12672|RL21B_YEAST	9.85	55	7
sp|Q08438|VHS3_YEAST	9.72	23.15	5
sp|P46988|PFD1_YEAST	9.7	67.89	9
sp|P25654|YCY0_YEAST	9.66	42.31	7
sp|P39714|BDH1_YEAST	9.64	37.43	5
sp|P53753|ENG1_YEAST	9.63	24.35	7
sp|P40022|YEM4_YEAST	9.62	82.16	8
sp|P36105|RL14A_YEAST	9.53	44.93	9
sp|P38345|FMP21_YEAST	9.46	84.06	6
sp|P38235|YBQ3_YEAST	9.44	56.7	7
sp|P21304|PWP1_YEAST	9.38	43.06	7
sp|Q3E757|RL11B_YEAST	9.37	44.25	8
sp|P45978|SCD6_YEAST	9.29	38.11	5
sp|P53200|AML1_YEAST	9.28	41.53	5
sp|Q01855|RS15_YEAST	9.27	46.48	14
sp|Q03833|GIS1_YEAST	9.2	31.32	10
sp|P53759|DUS1_YEAST	9.2	49.65	6
sp|Q00246|RHO4_YEAST	9.2	28.52	5
sp|P41940|MPG1_YEAST	9.16	39.89	5
sp|P16622|HEMH_YEAST	9.14	40.2	5
sp|P0CX42|RL23B_YEAST	9.12	45.99	9
sp|P48415|SEC16_YEAST	9.05	23.74	6
sp|P46984|GON7_YEAST	9	87.8	6
sp|P36154|AIM29_YEAST	8.97	63.87	9
sp|P11632|NHP6A_YEAST	8.92	64.52	5
sp|P38816|TRXB2_YEAST	8.81	67.54	32
sp|P25659|YCW6_YEAST	8.8	40.8	5
sp|Q03772|CWC15_YEAST	8.73	72.57	5
sp|P53299|TIM13_YEAST	8.73	64.76	10
sp|P53155|YGI2_YEAST	8.71	30.71	8
sp|Q07923|LOT6_YEAST	8.67	59.16	7
sp|P20606|SAR1_YEAST	8.65	67.89	7
sp|P33299|PRS7_YEAST	8.61	40.04	6
sp|Q08952|OXR1_YEAST	8.59	32.23	5
sp|Q06449|PIN3_YEAST	8.57	62.33	9
sp|Q05031|DFG5_YEAST	8.52	37.12	7
sp|Q05892|YL290_YEAST	8.46	62.82	5
sp|P07250|IPMK_YEAST	8.43	50.14	5
sp|P06168|ILV5_YEAST	8.41	28.86	5
sp|P43561|FET5_YEAST	8.4	28.3	6
sp|Q3E7X9|RS28A_YEAST	8.29	70.15	14
sp|O14455|RL36B_YEAST	8.28	43	10
sp|P36141|FMP46_YEAST	8.27	69.92	5
sp|P22133|MDHC_YEAST	8.26	33.42	4
sp|Q08745|RS10A_YEAST	8.26	56.19	4
sp|P32939|YPT7_YEAST	8.16	52.88	7
sp|Q06523|YP148_YEAST	8.14	44.83	9
sp|P23254|TKT1_YEAST	8.12	31.91	5
sp|P49017|COQ5_YEAST	8.12	45.6	6
sp|P48570|HOSC_YEAST	8.08	70.56	49
sp|P47017|LSM1_YEAST	8.07	83.14	5
sp|P53250|TWF1_YEAST	8.07	40.66	4
sp|P19955|RT31_YEAST	8.07	72.36	6
sp|P09624|DLDH_YEAST	8.06	40.88	4
sp|Q03148|SNZ1_YEAST	8.04	62.96	5
sp|Q04739|GAL83_YEAST	8.03	29.02	5
sp|P37262|SOL2_YEAST	8.02	59.05	10
sp|P14747|PP2B2_YEAST	8.02	33.11	6
sp|P36088|FRMSR_YEAST	8.02	42.78	4
sp|Q06336|GGA1_YEAST	8.01	49.55	4
sp|P39935|IF4F1_YEAST	8.01	37.5	8
sp|P07284|SYSC_YEAST	8.01	58.66	5
sp|Q06682|UBX5_YEAST	8.01	29.4	4
sp|Q08202|OPI10_YEAST	8.01	43.5	4
sp|P0C5N3|YG41A_YEAST	8.01	75.97	6
sp|P53163|MNP1_YEAST	8.01	34.02	8
sp|P13130|SS100_YEAST	8.01	16.56	5
sp|P48016|ATH1_YEAST	8	24.44	4
sp|Q04869|YM94_YEAST	8	38.97	5
sp|P32329|YPS1_YEAST	8	29.17	7
sp|Q3E764|TMA7_YEAST	8	73.44	5
sp|Q12349|ATP14_YEAST	8	68.55	13
sp|Q04338|VTI1_YEAST	8	46.54	5
sp|Q01519|COX12_YEAST	8	86.75	7
sp|P19073|CDC42_YEAST	8	41.36	6
sp|P14120|RL30_YEAST	8	50.48	5
sp|P25367|RNQ1_YEAST	7.94	17.53	5
sp|Q3E792|RS25A_YEAST	7.89	54.63	5
sp|Q12331|YFAS1_YEAST	7.88	61.76	6
sp|Q12166|LEU9_YEAST	7.84	62.42	24
sp|Q06494|PLR1_YEAST	7.84	72.75	4
sp|P33330|SERC_YEAST	7.84	33.16	6
sp|P27466|KCC1_YEAST	7.83	58.07	4
sp|P0CX50|RL18B_YEAST	7.82	49.46	6
sp|Q12165|ATPD_YEAST	7.77	76.88	11
sp|P40580|BZRD_YEAST	7.75	55.51	7
sp|P43603|LSB3_YEAST	7.72	27.02	5
sp|Q08969|GRE1_YEAST	7.71	50	8
sp|O13563|RPN13_YEAST	7.67	40.38	7
sp|P48164|RS7B_YEAST	7.64	59.47	7
sp|Q04934|IVY1_YEAST	7.64	43.71	4
sp|Q12462|PEX11_YEAST	7.64	52.12	6
sp|Q07478|SUB2_YEAST	7.61	40.81	7
sp|P42839|VNX1_YEAST	7.56	18.28	5
sp|P38711|RS27B_YEAST	7.49	37.8	9
sp|P41895|T2FA_YEAST	7.43	34.01	5
sp|P39940|RSP5_YEAST	7.39	34.61	5
sp|Q02784|GLRX5_YEAST	7.36	66.67	4
sp|Q12486|YOR31_YEAST	7.35	78.9	5
sp|P41057|RS29A_YEAST	7.33	80.36	5
sp|P38264|PHO88_YEAST	7.33	47.87	5
sp|P35691|TCTP_YEAST	7.33	36.53	5
sp|Q06677|SWA2_YEAST	7.3	41.02	5
sp|P38886|RPN10_YEAST	7.29	49.25	6
sp|P53281|LSB1_YEAST	7.27	38.59	7
sp|P40087|DDI1_YEAST	7.25	35.75	4
sp|Q12515|PAR32_YEAST	7.24	51.53	6
sp|P36973|APT2_YEAST	7.23	43.09	4
sp|P36076|CAB3_YEAST	7.22	23.99	4
sp|P30605|ITR1_YEAST	7.13	20.72	4
sp|P38266|AIM3_YEAST	7.1	15.63	4
sp|Q07541|YD121_YEAST	6.93	42.95	6
sp|P42937|YCH1_YEAST	6.92	81.08	4
sp|P38912|IF1A_YEAST	6.91	55.56	5
sp|P36041|EAP1_YEAST	6.85	43.35	4
sp|P38143|GPX2_YEAST	6.8	61.73	10
sp|P29311|BMH1_YEAST	6.78	76.78	36
sp|P40052|YEQ9_YEAST	6.77	45.71	7
sp|P38986|ASPG1_YEAST	6.71	44.36	4
sp|Q03778|RIFK_YEAST	6.71	41.74	5
sp|Q3E7Z5|YI002_YEAST	6.67	73.91	5
sp|P53075|SHE10_YEAST	6.64	33.28	5
sp|P36135|UTH1_YEAST	6.64	19.45	5
sp|P47176|BCA2_YEAST	6.63	46.28	6
sp|Q08742|RDL2_YEAST	6.48	45.64	8
sp|Q12680|GLT1_YEAST	6.41	27.74	6
sp|P32626|ENOPH_YEAST	6.41	45.37	4
sp|P53191|PIB2_YEAST	6.39	31.81	4
sp|P02294|H2B2_YEAST	6.36	41.98	5
sp|Q03529|SCS7_YEAST	6.34	27.6	7
sp|P39705|NUP60_YEAST	6.33	45.27	6
sp|P22696|ESS1_YEAST	6.33	40.59	3
sp|P39979|HPA3_YEAST	6.32	42.46	5
sp|P34220|YBF5_YEAST	6.32	34.45	4
sp|P38773|DOG2_YEAST	6.21	53.25	5
sp|P38797|PP2C7_YEAST	6.19	32.94	3
sp|P15700|KCY_YEAST	6.16	35.78	5
sp|P46969|RPE_YEAST	6.15	53.78	3
sp|P47166|SGM1_YEAST	6.14	30.55	4
sp|Q03533|TDA1_YEAST	6.14	27.3	6
sp|P23287|PP2B1_YEAST	6.14	27.67	5
sp|Q12326|PMG3_YEAST	6.13	58.75	7
sp|Q3E795|YL361_YEAST	6.13	75.51	4
sp|P38428|CUE1_YEAST	6.1	47.29	3
sp|P00812|ARGI_YEAST	6.09	33.03	3
sp|Q06685|VIP1_YEAST	6.07	28.45	5
sp|P07806-2|SYV_YEAST	6.06	32.8	6
sp|P32599|FIMB_YEAST	6.04	22.74	4
sp|P49334|TOM22_YEAST	6.04	51.97	4
sp|P0CX26|RL43B_YEAST	6.04	42.39	4
sp|P87108|TIM10_YEAST	6.03	89.25	4
sp|Q04401|ACN9_YEAST	6.03	48.87	5
sp|P16467|PDC5_YEAST	6.02	70.69	277
sp|P41807|VATH_YEAST	6.02	35.15	3
sp|Q12512|ZPS1_YEAST	6.02	47.79	8
sp|P35195|ECM15_YEAST	6.02	50	5
sp|P20449|DBP5_YEAST	6.01	40.66	7
sp|Q06178|NMA1_YEAST	6.01	31.17	3
sp|P47123|MOG1_YEAST	6.01	61.01	6
sp|P25491|MAS5_YEAST	6.01	30.56	3
sp|P01097|ATIF_YEAST	6.01	75.29	3
sp|Q12408|NPC2_YEAST	6.01	42.2	3
sp|P26263|PDC6_YEAST	6	63.77	320
sp|P38555|YPT31_YEAST	6	62.78	12
sp|Q3E7A9|CMC4_YEAST	6	71.23	5
sp|Q03674|PLB2_YEAST	6	14.87	4
sp|P16550|APA1_YEAST	6	32.4	3
sp|P38250|IST2_YEAST	6	19.03	10
sp|P12695|ODP2_YEAST	6	38.59	3
sp|Q3E7A4|COXM2_YEAST	6	70.64	3
sp|P43594|AIM13_YEAST	6	58.24	3
sp|P40518|ARPC5_YEAST	6	66.88	3
sp|P53379|MKC7_YEAST	6	18.46	3
sp|Q08561|IES4_YEAST	6	76.72	5
sp|P53903|PGA2_YEAST	6	53.49	4
sp|P43587|YPI1_YEAST	6	42.58	3
sp|Q07540|FRDA_YEAST	6	32.76	4
sp|P38166|SFT2_YEAST	6	41.86	3
sp|P07274|PROF_YEAST	6	68.25	7
sp|P53189|SCW11_YEAST	6	11.62	3
sp|P31109|SNC1_YEAST	6	67.52	5
sp|P00127|QCR6_YEAST	6	38.78	13
sp|P05319|RLA2_YEAST	6	39.62	3
sp|Q3E830|YC075_YEAST	6	69.33	6
sp|P80967|TOM5_YEAST	6	30	5
sp|P48813|GNP1_YEAST	5.87	29.71	5
sp|Q6Q546|HUB1_YEAST	5.85	43.84	6
sp|Q08492|BUD21_YEAST	5.82	27.1	6
sp|P54867|SLG1_YEAST	5.72	21.96	5
sp|Q12296|MAM3_YEAST	5.71	34.42	6
sp|P40169|YNT4_YEAST	5.71	14.95	6
sp|Q03559|YM8V_YEAST	5.7	54.82	4
sp|P38928|AXL2_YEAST	5.7	16.28	3
sp|Q05809|COA4_YEAST	5.7	51.04	3
sp|Q00055|GPD1_YEAST	5.67	13.55	6
sp|P38636|ATX1_YEAST	5.64	94.52	11
sp|P80428|ARP4_YEAST	5.64	19.84	3
sp|P16861|K6PF1_YEAST	5.58	25.13	3
sp|P53274|YG36_YEAST	5.54	56.96	4
sp|Q12040|YO283_YEAST	5.54	38.26	3
sp|P40477|NU159_YEAST	5.52	24.04	4
sp|P21957|OPI1_YEAST	5.48	46.78	4
sp|P40564|DJP1_YEAST	5.47	64.81	3
sp|P21375|OSM1_YEAST	5.45	37.52	5
sp|Q12316|YG13B_YEAST	5.43	34.07	26
sp|P01123|YPT1_YEAST	5.42	61.65	7
sp|P24280|SEC14_YEAST	5.41	59.54	4
sp|P42936|YG4D_YEAST	5.4	68.89	4
sp|Q06511|RRP15_YEAST	5.37	35.6	3
sp|Q12400|TRM10_YEAST	5.36	31.06	4
sp|P38162|YBK7_YEAST	5.34	52.04	3
sp|P53854|CWC25_YEAST	5.33	60.89	5
sp|P28000|RPAC2_YEAST	5.33	19.01	3
sp|P38182|ATG8_YEAST	5.29	49.57	4
sp|P0CX30|RS23B_YEAST	5.26	49.66	4
sp|P52893|ALAM_YEAST	5.23	38.34	4
sp|Q3E824|YO020_YEAST	5.23	62.22	5
sp|P43616|DUG1_YEAST	5.17	28.69	4
sp|Q02770|CWC27_YEAST	5.14	47.18	4
sp|P54000|SUB1_YEAST	5.11	50	3
sp|P53720|DUS2_YEAST	5.1	24.48	4
sp|Q03835|GLRX3_YEAST	5.1	15.44	4
sp|P38061|RL32_YEAST	5.09	43.08	4
sp|P36064|COXM1_YEAST	5.09	50.45	3
sp|P40011|YEK0_YEAST	5.07	37.18	4
sp|Q12753|HAA1_YEAST	5.04	31.12	3
sp|Q99288|DET1_YEAST	5.01	49.1	6
sp|P32452|PHA2_YEAST	4.95	36.23	4
sp|P33331|NTF2_YEAST	4.9	43.2	5
sp|P35734|ASK1_YEAST	4.83	53.08	5
sp|P47001|CIS3_YEAST	4.82	28.63	4
sp|Q12285|MDY2_YEAST	4.81	41.04	3
sp|P32771|FADH_YEAST	4.77	26.17	4
sp|P38885|AIM46_YEAST	4.67	71.61	3
sp|P33317|DUT_YEAST	4.67	43.54	5
sp|Q04418|RBA50_YEAST	4.64	44.87	4
sp|Q06451|TPO3_YEAST	4.64	21.7	3
sp|P15108|HSC82_YEAST	4.62	35.46	3
sp|P54837|TMEDA_YEAST	4.6	26.54	3
sp|P40008|FMP52_YEAST	4.56	46.32	3
sp|Q08967|FLC1_YEAST	4.55	29	4
sp|Q08230|SDHF2_YEAST	4.55	56.17	4
sp|Q05359|ERP1_YEAST	4.53	47.95	3
sp|P53550|DCP2_YEAST	4.44	25.98	5
sp|P11633|NHP6B_YEAST	4.42	66.67	3
sp|P23285|CYPB_YEAST	4.42	31.22	3
sp|P38199|HEK2_YEAST	4.38	18.64	3
sp|P38753|HSE1_YEAST	4.31	57.08	3
sp|P38795|NADE_YEAST	4.31	26.19	4
sp|P40069|IMB4_YEAST	4.29	14.38	5
sp|P38698|PPX1_YEAST	4.29	36.78	3
sp|Q3E769|YO59A_YEAST	4.29	51.11	3
sp|P41056|RL33B_YEAST	4.27	41.12	3
sp|P38351|PAF1_YEAST	4.25	29.89	3
sp|O74700|TIM9_YEAST	4.24	37.93	3
sp|P40510|SER33_YEAST	4.23	57.57	13
sp|P40051|ICP55_YEAST	4.23	50.49	3
sp|P40515|FIS1_YEAST	4.23	62.58	3
sp|Q06580|MLC2_YEAST	4.23	51.53	2
sp|P12612|TCPA_YEAST	4.22	31.66	4
sp|P11914|MPPA_YEAST	4.21	39.63	5
sp|P39939|RS26B_YEAST	4.21	42.86	3
sp|Q3E7A3|YJ133_YEAST	4.19	93.24	3
sp|P43558|OTU1_YEAST	4.19	50.5	3
sp|P31373|CYS3_YEAST	4.18	50	4
sp|P32463|ACPM_YEAST	4.17	46.4	12
sp|P40555|PSMD9_YEAST	4.16	45	2
sp|P26637|SYLC_YEAST	4.15	21.56	4
sp|Q02776|TIM50_YEAST	4.15	40.13	2
sp|Q08992|HSP32_YEAST	4.14	48.1	2
sp|P27616|PUR7_YEAST	4.14	34.64	2
sp|Q04603|DPB4_YEAST	4.13	59.69	2
sp|P25694|CDC48_YEAST	4.11	20.36	2
sp|Q06549|CDD_YEAST	4.11	38.03	2
sp|Q06144|ORM2_YEAST	4.11	40.28	2
sp|Q12494|KCS1_YEAST	4.09	33.62	2
sp|P18962|DAP2_YEAST	4.09	21.64	4
sp|P32897|TIM23_YEAST	4.08	38.74	6
sp|P40471|AYR1_YEAST	4.08	21.55	3
sp|P23248|RS3A2_YEAST	4.07	71.76	24
sp|P32335|MSS51_YEAST	4.06	43.81	3
sp|P05626|ATPF_YEAST	4.06	22.54	2
sp|P26784|RL16A_YEAST	4.05	42.21	5
sp|P46992|YJR1_YEAST	4.05	25.76	7
sp|P40513|MAM33_YEAST	4.05	40.98	4
sp|P28241|IDH2_YEAST	4.04	20.6	3
sp|P32775|GLGB_YEAST	4.04	34.66	2
sp|P38697|IMDH2_YEAST	4.03	65.58	32
sp|P00830|ATPB_YEAST	4.03	29.94	2
sp|Q05533|INM2_YEAST	4.03	20.89	3
sp|P05739|RL6B_YEAST	4.02	55.11	11
sp|P36156|GTO2_YEAST	4.02	43.51	2
sp|P33755|NPL4_YEAST	4.02	33.28	2
sp|Q03656|SKY1_YEAST	4.02	21.97	2
sp|P36169|SKG1_YEAST	4.02	30.42	2
sp|P16862|K6PF2_YEAST	4.01	25.55	2
sp|P53867|ATG4_YEAST	4.01	37.04	3
sp|P47082|AVT1_YEAST	4.01	24.75	2
sp|P39743|RV167_YEAST	4.01	18.88	2
sp|P39990|SNU13_YEAST	4.01	59.52	2
sp|P47099|YJ12A_YEAST	4	52.95	26
sp|P07260|IF4E_YEAST	4	41.31	3
sp|P32795|YME1_YEAST	4	47.12	3
sp|P22147|XRN1_YEAST	4	26.37	3
sp|Q03016|GIP3_YEAST	4	21.08	2
sp|Q04322|GYL1_YEAST	4	34.58	2
sp|P47116|PTK2_YEAST	4	25.06	2
sp|Q01662|MAP1_YEAST	4	46.77	5
sp|P53913|FYV6_YEAST	4	70.52	2
sp|P09938|RIR2_YEAST	4	27.82	2
sp|P38809|YHP7_YEAST	4	50.27	3
sp|P32831|NGR1_YEAST	4	22.02	2
sp|P23493|MBR1_YEAST	4	35.4	2
sp|P22470|SAN1_YEAST	4	17.05	2
sp|Q99176|SRN2_YEAST	4	38.5	2
sp|Q12425|ISA2_YEAST	4	36.76	2
sp|Q03390|VPS60_YEAST	4	43.67	2
sp|P03872|REP2_YEAST	4	32.09	3
sp|Q12233|ATPN_YEAST	4	42.61	2
sp|Q07651|FMP45_YEAST	4	19.42	2
sp|P40089|LSM5_YEAST	4	77.42	2
sp|P25036|YSP3_YEAST	4	20.08	2
sp|P10622|RLA3_YEAST	4	47.17	3
sp|Q03323|SDC1_YEAST	4	36.57	2
sp|Q96VH4|HBN1_YEAST	4	29.53	3
sp|P43497|CWP2_YEAST	4	18.48	2
sp|P32263|P5CR_YEAST	4	15.03	2
sp|P15731|UBC4_YEAST	4	37.16	3
sp|Q05827|HOR7_YEAST	4	50.85	3
sp|P50106|RPA14_YEAST	4	9.489	2
sp|P38216|YBM6_YEAST	4	14.06	7
sp|P13188|SYQ_YEAST	3.93	33.99	2
sp|Q03233|ADD37_YEAST	3.93	65.15	3
sp|P69771|DID2_YEAST	3.84	59.8	3
sp|P19454|CSK22_YEAST	3.8	24.48	2
sp|Q07914|TIM14_YEAST	3.8	19.64	2
sp|P47035|NET1_YEAST	3.78	30.78	3
sp|P38801|LRP1_YEAST	3.78	60.33	3
sp|P34240|ZRT3_YEAST	3.78	19.68	2
sp|Q03429|MZM1_YEAST	3.77	39.02	4
sp|P32774|T2AG_YEAST	3.7	31.15	2
sp|Q08229|NBA1_YEAST	3.68	38.52	3
sp|Q9P305|IGO2_YEAST	3.64	57.25	4
sp|P34221|PP2C3_YEAST	3.63	25.21	10
sp|P01094|IPA3_YEAST	3.63	47.06	7
sp|Q7LHD1|CCW22_YEAST	3.62	12.5	5
sp|Q01852|TIM44_YEAST	3.59	30.39	4
sp|Q12009|TRMB_YEAST	3.56	73.78	2
sp|P06774|HAP2_YEAST	3.54	35.85	2
sp|P19145|GAP1_YEAST	3.54	10.13	2
sp|Q03640|TCB3_YEAST	3.52	23.95	2
sp|P27692|SPT5_YEAST	3.49	19.47	2
sp|P33297|PRS6A_YEAST	3.46	41.24	2
sp|P25343|RV161_YEAST	3.43	47.17	2
sp|P53616|SUN4_YEAST	3.43	18.81	2
sp|P40344|ATG3_YEAST	3.43	15.48	2
sp|P33333|PLSC_YEAST	3.39	45.54	2
sp|P32906|MNS1_YEAST	3.38	35.52	3
sp|P60010|ACT_YEAST	3.38	36.27	3
sp|P32623|CRH2_YEAST	3.36	19.49	3
sp|Q06151|DCPS_YEAST	3.34	37.14	2
sp|Q8J0M4|YCB2_YEAST	3.34	47.01	2
sp|Q06689|YL413_YEAST	3.33	13.33	3
sp|P0CX34|RS30B_YEAST	3.31	44.44	4
sp|Q3E731|COX19_YEAST	3.3	83.67	2
sp|P25299|RNA15_YEAST	3.23	36.82	4
sp|P27476|NSR1_YEAST	3.16	53.62	2
sp|Q02629|NU100_YEAST	3.16	14.6	2
sp|P47122|NPA3_YEAST	3.16	22.6	2
sp|P38293|UMP1_YEAST	3.16	35.81	2
sp|Q03034|FDC1_YEAST	3.15	32.6	2
sp|Q06833|YP091_YEAST	3.12	32.86	2
sp|P32445|RIM1_YEAST	3.11	39.26	4
sp|P00044|CYC1_YEAST	3.07	58.72	5
sp|P39076|TCPB_YEAST	3.04	31.69	3
sp|P47089|DENR_YEAST	3.04	22.73	2
sp|P53724|RM50_YEAST	3.03	23.74	2
sp|P36024|SIS2_YEAST	3.02	27.05	4
sp|Q12164|POM33_YEAST	3.01	24.01	2
sp|P06738|PHSG_YEAST	3.01	27.38	3
sp|P21827|RCC1_YEAST	2.99	34.65	4
sp|Q06505|IWS1_YEAST	2.99	30.24	3
sp|P53438|SOK2_YEAST	2.97	16.05	2
sp|P09435|HSP73_YEAST	2.96	60.25	137
sp|P22579|SIN3_YEAST	2.93	23.24	2
sp|Q03823|YM35_YEAST	2.89	26.59	3
sp|P53904|TBCB_YEAST	2.88	23.23	2
sp|P50944|AVT4_YEAST	2.87	30.58	2
sp|Q07657|SHS1_YEAST	2.86	26.5	2
sp|Q03020|ISU1_YEAST	2.8	18.79	2
sp|P38822|BZZ1_YEAST	2.79	18.17	2
sp|Q12402|YOP1_YEAST	2.76	32.22	3
sp|P40529|AGE2_YEAST	2.72	47.99	3
sp|P00128|QCR7_YEAST	2.72	48.82	2
sp|Q05926|GLRX8_YEAST	2.7	34.86	3
sp|P40463|VHS2_YEAST	2.69	19.95	6
sp|P36108|DID4_YEAST	2.68	35.34	2
sp|Q12063|UPPS_YEAST	2.67	46.93	2
sp|P21954|IDHP_YEAST	2.64	30.37	3
sp|Q03264|NGL2_YEAST	2.64	30.29	3
sp|Q04964|SML1_YEAST	2.64	46.15	6
sp|P20435|RPAB2_YEAST	2.62	68.39	4
sp|P49957|TRM9_YEAST	2.6	69.89	3
sp|P38994|MSS4_YEAST	2.6	26.7	3
sp|P40495|LYS12_YEAST	2.59	32.61	2
sp|Q03707|SRC1_YEAST	2.57	24.1	2
sp|P87262|RL34A_YEAST	2.56	52.07	4
sp|P13517|CAPZB_YEAST	2.55	36.59	2
sp|P41896|T2FB_YEAST	2.51	28.25	2
sp|P18544|ARGD_YEAST	2.5	42.79	3
sp|Q04170|YD391_YEAST	2.5	28.45	3
sp|P47173|YJ9J_YEAST	2.44	28.36	2
sp|Q06169|PEX30_YEAST	2.44	15.87	4
sp|P49167|RL38_YEAST	2.44	53.85	2
sp|P43569|CAF16_YEAST	2.41	41.52	2
sp|Q04033|YD415_YEAST	2.39	23.53	2
sp|P53330|RT102_YEAST	2.39	52.87	2
sp|Q04438|SPG4_YEAST	2.39	73.91	2
sp|P40433|6P21_YEAST	2.38	34.7	2
sp|P40096|NCB1_YEAST	2.37	25.35	2
sp|P53212|YG1D_YEAST	2.35	30.69	2
sp|Q06177|TMA10_YEAST	2.32	66.28	2
sp|P27705|MIG1_YEAST	2.3	28.97	2
sp|P34226|SKT5_YEAST	2.27	18.97	2
sp|P53193|JAC1_YEAST	2.27	51.63	2
sp|P38325|OM14_YEAST	2.27	40.3	3
sp|P15274|AMPD_YEAST	2.26	29.38	2
sp|P19262|ODO2_YEAST	2.24	22.25	2
sp|Q02606|YP014_YEAST	2.2	31.5	2
sp|P40472|SIM1_YEAST	2.2	14.5	2
sp|P54858|DOS2_YEAST	2.17	40.32	2
sp|P40168|YNT5_YEAST	2.17	47.13	2
sp|P43321|SMD3_YEAST	2.16	34.65	3
sp|P42844|ZIM17_YEAST	2.16	37.36	1
sp|Q05931|HSP7Q_YEAST	2.14	27.85	3
sp|P40343|VPS27_YEAST	2.14	29.26	2
sp|Q04336|YM54_YEAST	2.12	31.89	1
sp|P52910|ACS2_YEAST	2.12	26.79	4
sp|P39724|AIM1_YEAST	2.12	46.61	2
sp|Q04272|VPS20_YEAST	2.1	36.65	1
sp|Q05518|PAL1_YEAST	2.09	36.47	2
sp|P25631|YCU1_YEAST	2.09	40.99	1
sp|Q07825|FRA1_YEAST	2.08	31.78	2
sp|Q02875|SYH1_YEAST	2.08	22.61	1
sp|P19146|ARF2_YEAST	2.07	67.4	12
sp|P17555|CAP_YEAST	2.07	21.29	2
sp|P27809|KRE2_YEAST	2.06	39.59	1
sp|P40354|NTA1_YEAST	2.06	33.26	1
sp|P21965|MCK1_YEAST	2.06	43.47	2
sp|P36027|MID2_YEAST	2.06	32.45	1
sp|Q3E752|YP036_YEAST	2.06	58.21	2
sp|P05317|RLA0_YEAST	2.05	23.08	2
sp|P33417|IXR1_YEAST	2.05	10.39	1
sp|P50623|UBC9_YEAST	2.05	32.48	2
sp|P34758|SCD5_YEAST	2.05	6.307	2
sp|P39719|FLC2_YEAST	2.04	12.13	1
sp|P52490|UBC13_YEAST	2.04	28.76	1
sp|P32803|EMP24_YEAST	2.03	37.44	4
sp|P38439|LEO1_YEAST	2.02	22.41	2
sp|P00175|CYB2_YEAST	2.02	28.09	1
sp|P38426|TPS3_YEAST	2.02	27.8	2
sp|P07213|TOM70_YEAST	2.02	46.03	1
sp|P15303|SEC23_YEAST	2.02	21.74	1
sp|Q05778|POC1_YEAST	2.02	34.42	1
sp|P40335|PEP8_YEAST	2.02	19	1
sp|Q3E833|PCC1_YEAST	2.02	53.41	1
sp|P53549|PRS10_YEAST	2.01	24.94	3
sp|P31383|2AAA_YEAST	2.01	14.49	2
sp|P36145|T2EB_YEAST	2.01	22.87	1
sp|Q02455|MLP1_YEAST	2.01	44.59	1
sp|P53112|PEX14_YEAST	2.01	56.6	2
sp|P40012|PPOX_YEAST	2.01	34.88	1
sp|P25617|YCQ6_YEAST	2.01	57.59	1
sp|P38694|MSC7_YEAST	2.01	20.65	2
sp|P25293|NAP1_YEAST	2.01	26.86	1
sp|Q07451|YET3_YEAST	2.01	25.12	1
sp|P38219|OLA1_YEAST	2.01	21.32	1
sp|P36095|VPS24_YEAST	2.01	29.46	1
sp|P04911|H2A1_YEAST	2.01	50.76	1
sp|P32496|RPN12_YEAST	2.01	33.21	1
sp|Q07629|YD218_YEAST	2.01	9.148	1
sp|P49626|RL4B_YEAST	2	71.55	31
sp|P17076|RL8A_YEAST	2	66.02	25
sp|O13516|RS9A_YEAST	2	48.22	13
sp|P05738|RL9A_YEAST	2	73.3	9
sp|P0C0V8|RS21A_YEAST	2	81.61	16
sp|Q02753|RL21A_YEAST	2	52.5	7
sp|P04449|RL24A_YEAST	2	47.74	6
sp|P05744|RL33A_YEAST	2	41.12	3
sp|P32478|HS150_YEAST	2	17.68	2
sp|Q03180|PIR3_YEAST	2	19.08	2
sp|P36126|SPO14_YEAST	2	36.78	1
sp|P19097|FAS2_YEAST	2	24.59	1
sp|P19524|MYO2_YEAST	2	16.71	1
sp|P46949|FYV8_YEAST	2	37.33	1
sp|P12689|REV1_YEAST	2	23.55	1
sp|P36165|TGL4_YEAST	2	21.54	1
sp|P32591|SWI3_YEAST	2	24.48	1
sp|P30822|XPO1_YEAST	2	22.32	1
sp|Q08732|HRK1_YEAST	2	26.35	1
sp|P46678|TFC5_YEAST	2	31.14	1
sp|P35183|AST1_YEAST	2	34.27	2
sp|Q05812|MSC3_YEAST	2	26.24	1
sp|Q04602|VBA4_YEAST	2	31.25	1
sp|P50109|PSP2_YEAST	2	30.69	1
sp|P40535|ACA2_YEAST	2	33.56	1
sp|P14680|YAK1_YEAST	2	21.31	1
sp|P04802|SYDC_YEAST	2	28.9	1
sp|P50105|TAF4_YEAST	2	42.01	1
sp|P39014|MET30_YEAST	2	20.62	1
sp|P32618|YEF3_YEAST	2	18.31	1
sp|P34761|WHI3_YEAST	2	23	1
sp|Q08108|PLB3_YEAST	2	16.18	1
sp|P53920|NM111_YEAST	2	14.54	1
sp|P32505|NAB2_YEAST	2	26.67	1
sp|P47135|JSN1_YEAST	2	12.65	1
sp|P40316|SECU_YEAST	2	41.55	1
sp|P40038|PCL6_YEAST	2	33.33	1
sp|P39976|DLD3_YEAST	2	31.25	1
sp|Q05636|RRP45_YEAST	2	25.25	1
sp|Q02256|PVH1_YEAST	2	21.98	1
sp|Q02204|RM13_YEAST	2	42.05	1
sp|P53139|YGK8_YEAST	2	54.29	1
sp|P42949|TIM16_YEAST	2	77.85	1
sp|Q12446|LAS17_YEAST	2	13.74	1
sp|Q06389|NCS1_YEAST	2	27.37	1
sp|Q03219|YM44_YEAST	2	24.82	1
sp|Q02933|RNY1_YEAST	2	23.73	1
sp|P43588|RPN11_YEAST	2	35.62	1
sp|P16451|ODPX_YEAST	2	25.85	1
sp|Q3E772|YG169_YEAST	2	64.13	1
sp|Q06325|YPS7_YEAST	2	19.46	1
sp|Q03940|RUVB1_YEAST	2	15.77	1
sp|Q03769|ENT5_YEAST	2	18.25	1
sp|P36040|POC2_YEAST	2	35.58	1
sp|P27680|COQ3_YEAST	2	23.72	1
sp|P06781|RHO2_YEAST	2	48.96	1
sp|Q08826|SNX3_YEAST	2	50	1
sp|P89886|TMA20_YEAST	2	52.49	1
sp|P50087|MOS2_YEAST	2	29.61	1
sp|P43682|SFT1_YEAST	2	77.32	1
sp|P40056|GET2_YEAST	2	20	1
sp|P40043|RGI1_YEAST	2	41.61	1
sp|P38777|FSH1_YEAST	2	33.33	1
sp|P36531|RM36_YEAST	2	36.16	1
sp|P34909|NOT4_YEAST	2	19.08	1
sp|Q08004|BUD20_YEAST	2	54.22	1
sp|Q04344|HNT1_YEAST	2	37.97	1
sp|Q03954|SPC19_YEAST	2	21.21	1
sp|Q02205|MEH1_YEAST	2	35.33	1
sp|P57743|LSM3_YEAST	2	59.55	1
sp|P53725|MPP6_YEAST	2	29.03	1
sp|P35725|YKG3_YEAST	2	25.15	1
sp|P35180|TOM20_YEAST	2	39.34	1
sp|P29029|CHIT_YEAST	2	9.609	3
sp|P25566|MXR2_YEAST	2	29.76	1
sp|P20048|SEC59_YEAST	2	6.551	1
sp|P18852|GBG_YEAST	2	38.18	1
sp|P00546|CDK1_YEAST	2	25.17	1
sp|Q99210|YO111_YEAST	2	18.53	1
sp|Q8TGU7|YB126_YEAST	2	85.29	1
sp|Q3E842|YM122_YEAST	2	57.14	1
sp|Q3E7B7|YD85C_YEAST	2	36.76	1
sp|Q3E785|SDHF1_YEAST	2	36.71	1
sp|Q12248|DAD1_YEAST	2	34.04	1
sp|Q02771|PT117_YEAST	2	42.06	1
sp|P53834|HCH1_YEAST	2	30.07	1
sp|P49166|RL37A_YEAST	2	45.45	1
sp|P38314|SDS24_YEAST	2	7.021	1
sp|P36532|RM37_YEAST	2	56.19	1
sp|P29704|FDFT_YEAST	2	10.14	1
sp|P26754|RFA2_YEAST	2	17.58	1
sp|Q3E762|YB230_YEAST	2	33.33	2
sp|Q06333|BL1S4_YEAST	2	49.18	1
sp|Q06011|ECM19_YEAST	2	26.79	1
sp|Q05789|YL211_YEAST	2	27.88	1
sp|Q05015|FSH2_YEAST	2	10.31	1
sp|P53889|FMP41_YEAST	2	16.22	3
sp|P53256|RRP46_YEAST	2	13.45	1
sp|P51601|GCH1_YEAST	2	9.465	1
sp|P47093|LSM8_YEAST	2	24.77	1
sp|P40554|URM1_YEAST	2	23.23	1
sp|P40319|ELO3_YEAST	2	5.217	1
sp|P35179|SC61G_YEAST	2	23.75	1
sp|P33421|SDH3_YEAST	2	9.596	1
sp|P33328|SNC2_YEAST	2	20	1
sp|P22139|RPAB5_YEAST	2	54.29	1
sp|A5Z2X5|YP010_YEAST	2	31.94	2
sp|Q3E840|DPH3_YEAST	2	15.85	1
sp|Q07648|DTD_YEAST	2	7.333	2
sp|P46973|HIT1_YEAST	2	8.537	1
sp|P40099|FTHC_YEAST	2	10.43	1
sp|P36110|PRY2_YEAST	2	4.559	1
sp|P32914|SPT4_YEAST	2	14.71	1
sp|P19956|RM44_YEAST	2	16.33	1
sp|P14724|CDC26_YEAST	2	19.35	1
sp|Q02486|ABF2_YEAST	1.93	40.44	1
sp|P12688|YPK1_YEAST	1.92	26.91	1
sp|P36421|SYYC_YEAST	1.92	35.03	1
sp|P35723|YET1_YEAST	1.92	40.29	1
sp|P07807|DYR_YEAST	1.92	51.18	1
sp|Q12199|TIP41_YEAST	1.92	23.31	1
sp|Q12415|TFC7_YEAST	1.92	16.55	1
sp|Q07549|SNA4_YEAST	1.89	39.29	1
sp|P39005|KRE9_YEAST	1.89	6.884	1
sp|P36077|SRX1_YEAST	1.89	18.11	1
sp|Q99247|YO087_YEAST	1.85	31.81	1
sp|P48837|NUP57_YEAST	1.82	16.45	2
sp|Q02100|SKO1_YEAST	1.78	26.43	2
sp|P37304|PAM1_YEAST	1.73	44.34	1
sp|Q00245|RHO3_YEAST	1.73	22.51	2
sp|P39936|IF4F2_YEAST	1.72	21.12	3
sp|Q08986|SAM3_YEAST	1.72	12.78	1
sp|P53082|FRA2_YEAST	1.72	47.5	1
sp|P25628|ARE1_YEAST	1.72	18.69	1
sp|P32047|MLF3_YEAST	1.72	24.56	1
sp|P40459|PANC_YEAST	1.72	8.091	1
sp|P39988|BUD16_YEAST	1.72	19.87	1
sp|P20084|RM33_YEAST	1.72	56.98	1
sp|P47009|YJO4_YEAST	1.72	13.46	1
sp|P38085|TAT1_YEAST	1.66	11.31	2
sp|P04650|RL39_YEAST	1.66	54.9	2
sp|D6VTK4|STE2_YEAST	1.65	16.47	3
sp|P38996|NAB3_YEAST	1.63	14.84	3
sp|P39968|VAC8_YEAST	1.6	21.45	1
sp|Q06493|YLH47_YEAST	1.6	18.94	1
sp|Q06810|OPY2_YEAST	1.6	9.444	1
sp|Q12207|NCE2_YEAST	1.59	24.28	1
sp|P51402|RL37B_YEAST	1.57	32.95	1
sp|P53832|WSC2_YEAST	1.55	11.13	2
sp|P32565|RPN2_YEAST	1.5	8.36	1
sp|P40088|FTR1_YEAST	1.5	18.56	1
sp|Q03790|NUP53_YEAST	1.46	37.47	2
sp|P47912|LCF4_YEAST	1.42	21.47	1
sp|Q12342|LDB17_YEAST	1.42	34.83	1
sp|Q04372|TAP42_YEAST	1.42	21.58	1
sp|Q06106|MRD1_YEAST	1.39	25.48	2
sp|P08539|GPA1_YEAST	1.36	27.12	1
sp|Q06651|PIB1_YEAST	1.36	46.5	1
sp|Q12416|WHI5_YEAST	1.36	33.22	1
sp|P19807|HNM1_YEAST	1.36	16.16	1
sp|Q6WNK7|SUS1_YEAST	1.36	52.08	1
sp|P53297|PBP1_YEAST	1.32	25.48	1
sp|P33308|MED9_YEAST	1.31	77.18	2
sp|P05743|RL26A_YEAST	1.3	57.48	12
sp|P47136|BUD4_YEAST	1.3	24.88	2
sp|P30665|MCM4_YEAST	1.29	25.29	1
sp|P36166|PXL1_YEAST	1.29	33.57	1
sp|P23292|KC12_YEAST	1.29	12.09	1
sp|P32781|AGA2_YEAST	1.29	11.49	1
sp|P29547|EF1G1_YEAST	1.23	16.63	2
sp|P20134|SFL1_YEAST	1.2	13.05	1
sp|P50896|PSP1_YEAST	1.19	18.91	2
sp|P38615|RIM11_YEAST	1.17	24.32	1
sp|P42939|MVB12_YEAST	1.17	49.5	2
sp|P36013|MAOM_YEAST	1.16	31.69	1
sp|P38088|SYG_YEAST	1.13	42.46	1
sp|P12611|WHI2_YEAST	1.1	22.84	1
sp|P50111|ZDS1_YEAST	1.09	19.23	1
sp|P25302|SWI4_YEAST	1.09	15.28	1
sp|P40059|DOT6_YEAST	1.09	16.12	1
sp|P23291|KC11_YEAST	1.09	25.65	1
sp|Q12451|OSH2_YEAST	1.07	26.58	2
sp|P38332|DPH7_YEAST	1.07	30.49	3
sp|P38212|RCR1_YEAST	1.03	24.41	1
sp|P34164|SIP2_YEAST	1.01	33.49	3
sp|P31386|ATS1_YEAST	1.01	27.93	1
sp|Q92331|VPS5_YEAST	1	47.41	2
sp|P38137|FAT2_YEAST	1	29.83	2
sp|P06634|DED1_YEAST	0.98	27.98	1
sp|P31377|STX8_YEAST	0.98	51.76	1
sp|P32656|CHAC_YEAST	0.98	5.172	1
sp|Q04779|RCO1_YEAST	0.96	32.16	1
sp|P53905|LSM7_YEAST	0.96	42.61	1
sp|P32453|ATP11_YEAST	0.91	11.01	1
sp|P40070|LSM4_YEAST	0.9	35.29	1
sp|P40204|RUXG_YEAST	0.89	27.27	1
sp|Q05948|YL225_YEAST	0.84	21.38	2
sp|P47129|ACF4_YEAST	0.83	25.89	1
sp|Q12184|ADRX_YEAST	0.83	26.16	2
RRRRRsp|Q08831|VTS1_YEAST	0.83	6.31	1
sp|Q08963|RU2A_YEAST	0.82	16.81	1
sp|P41058|RS29B_YEAST	0.81	76.79	4
sp|P33416|HSP78_YEAST	0.81	25.28	2
sp|Q06405|ATPK_YEAST	0.79	18.81	2
sp|Q12452|ERG27_YEAST	0.78	12.68	1
sp|Q03290|TFB3_YEAST	0.76	39.25	1
sp|Q05775|EIF3J_YEAST	0.76	35.09	1
sp|P29366|BEM1_YEAST	0.76	19.24	1
sp|Q08422|YO052_YEAST	0.75	35.33	1
sp|Q01217|ARG56_YEAST	0.72	32.79	2
sp|P53738|TR112_YEAST	0.71	5.926	1
sp|Q04215|YM13A_YEAST	0.69	30.45	8
sp|Q3E846|COA6_YEAST	0.69	71.15	1
sp|P40516|SEE1_YEAST	0.69	20.23	1
sp|P49687|NU145_YEAST	0.68	22.1	2
sp|P08019|AMYG_YEAST	0.67	17.67	1
sp|Q03178|PIR1_YEAST	0.66	28.74	2
sp|P43565|RIM15_YEAST	0.66	20.34	1
sp|Q08208|NOP12_YEAST	0.65	22.44	1
sp|Q03266|PABC_YEAST	0.65	25.67	1
sp|P40210|SIP5_YEAST	0.64	17.18	1
sp|Q05635|RNH2B_YEAST	0.61	21.14	1
sp|P80210|PURA_YEAST	0.6	26.79	1
sp|P05747|RL29_YEAST	0.6	13.56	1
sp|P05374|CHO2_YEAST	0.59	15.3	2
sp|P27810|KTR1_YEAST	0.58	29.77	1
RRRRRsp|P53119|HUL5_YEAST	0.58	17.03	1
sp|P25642|IMG2_YEAST	0.57	72.6	1
sp|P54003|SUR7_YEAST	0.57	20.2	1
sp|P40956|GTS1_YEAST	0.53	20.71	1
sp|P53267|DAM1_YEAST	0.53	14.58	1
sp|P40533|TED1_YEAST	0.52	22.83	2
sp|P0C2I8|YL14A_YEAST	0.5	54.32	28
sp|P38749|YAP3_YEAST	0.5	30	1
sp|P31382|PMT2_YEAST	0.5	14.49	1
sp|Q08689|NAT5_YEAST	0.48	7.955	1
sp|P33324|YKJ1_YEAST	0.47	7.419	1
sp|P53894|CBK1_YEAST	0.47	13.89	1
sp|P47127|AIM24_YEAST	0.46	27.16	1
sp|P46982|MNN5_YEAST	0.44	22.18	1
RRRRRsp|P31787|ACBP_YEAST	0.44	26.44	1
sp|Q12046|CWC2_YEAST	0.43	26.55	1
sp|Q06263|VTA1_YEAST	0.43	13.64	1
sp|Q03088|SVL3_YEAST	0.41	9.455	2
sp|P38634|SIC1_YEAST	0.41	19.72	1
sp|P38249|EIF3A_YEAST	0.4	36.93	2
sp|Q12344|GYP5_YEAST	0.4	30.31	1
sp|P25555|GBP2_YEAST	0.39	22.48	1
RRRRRsp|Q04924|GLU2B_YEAST	0.39	16.24	1
sp|Q12198|METW_YEAST	0.38	14.78	1
sp|Q03919|RUB1_YEAST	0.37	44.16	2
sp|P40422|RPAB4_YEAST	0.37	51.43	1
sp|P38625|GUAA_YEAST	0.36	22.1	1
sp|P38302|NTC20_YEAST	0.36	30	1
sp|Q03103|ERO1_YEAST	0.35	20.78	1
sp|P33753|TRM2_YEAST	0.33	42.57	1
sp|Q12386|ARP8_YEAST	0.33	14.64	1
sp|P07172|HIS8_YEAST	0.33	29.09	1
sp|Q3E7B6|VA0E_YEAST	0.31	13.7	1
sp|P38754|RL14B_YEAST	0.3	46.38	9
sp|P81450|ATP18_YEAST	0.28	25.42	2
sp|P04050|RPB1_YEAST	0.25	22.56	1
sp|Q08446|SGT1_YEAST	0.25	43.04	1
sp|P00045|CYC7_YEAST	0.23	68.14	3
sp|Q99271|NAH1_YEAST	0.23	12.28	1
sp|P36100|T2EA_YEAST	0.23	17.63	1
sp|Q08989|YP277_YEAST	0.23	14.37	1
sp|P81449|ATPJ_YEAST	0.23	20.83	1
sp|Q05580|YD266_YEAST	0.22	24.88	1
RRRRRsp|P38623|RCK2_YEAST	0.22	13.28	1
RRRRRsp|Q07747|AAD4_YEAST	0.21	12.77	1
sp|P56628|RL22B_YEAST	0.21	19.67	1
