# Supplementary figures and images for: In-depth comparative proteomic analysis of yeast proteome using iTRAQ and SWATH based MS
Source: Royal Society of Chemistry journal article supplement (doi:10.1039/c5mb00234f), 2015-06-09

# Supplementary figure 1

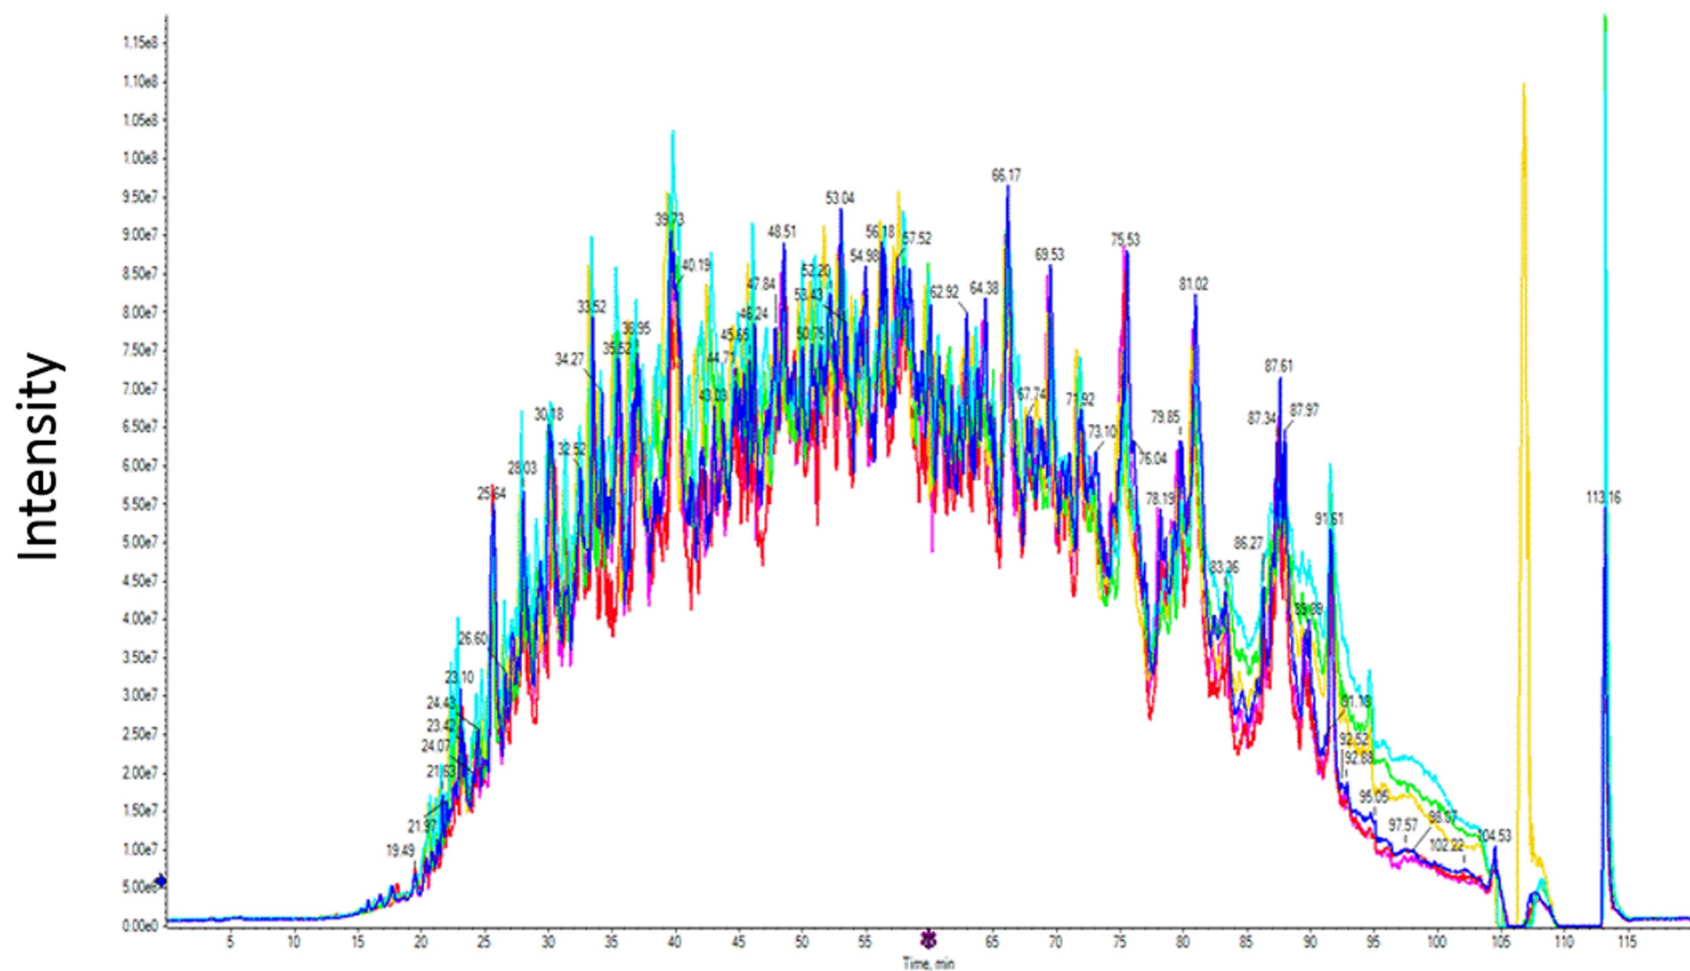

Supplement: c5mb00234f2.pdf [file c5mb00234f2.pdf]
